# Supplementary material for: SCS3 and YFT2 Link Transcription of Phospholipid Biosynthetic Genes to ER Stress and the UPR
Source: PLoS Genet. 2012 Aug 23;8(8):e1002890. doi: 10.1371/journal.pgen.1002890 (PMC3426550; doi:10.1371/journal.pgen.1002890)
Supplement: Table S1 — Stringent Set of SCS3 and YFT2 Genetic Interactions. (XLSX) [file pgen.1002890.s009.xlsx]

## Sheet: 636 FIT gene interactions
Table S1. Genetic Interactions of the Yeast FIT Genes
ORF	Gene	xxxD size	STDEV	Fitness	scs3D xxxD size	STDEV	Colony size difference	p value	fitness	epsilon	yft2D xxxD size	STDEV	Colony size difference	p value	fitness	epsilon	scs3D yft2D xxxD size	STDEV	Colony size difference	p value	fitness	epsilon	Description
YAL026C	DRS2	233.476	36.8389	0.884379	109.422	24.8427	124.054	1.53154e-06	0.414477	-0.42303	222.445	53.6721	11.0309	0.668632	0.842595	-0.00817745	174.747	23.9197	58.7288	0.00176104	0.661921	-0.125176	Aminophospholipid translocase (flippase) that maintains membrane lipid asymmetry in post-Golgi secretory vesicles; contributes to clathrin-coated vesicle formation and endocytosis; mutations in human homolog ATP8B1 result in liver disease
YAL027W		264.166	21.9137	1.00063	217.831	16.3623	46.3353	0.000330044	0.825117	-0.122479	239.872	32.8355	24.2945	0.147428	0.908605	-0.0540008	232.661	19.5226	31.5051	0.011706	0.881292	-0.00926819	Protein involved in Rad1p/Rad10p-dependent removal of 3'-nonhomologous tails during double-strand break repair via single-strand annealing; green fluorescent protein (GFP)-fusion protein localizes to the nucleus
YAL028W	FRT2	263.957	32.9487	0.999836	217.888	17.0027	46.0686	0.00251591	0.825333	-0.121511	227.359	20.6711	36.5973	0.0163653	0.86121	-0.100632	204.426	23.8661	59.5301	0.00104146	0.774343	-0.115511	Tail-anchored endoplasmic reticulum membrane protein, interacts with homolog Frt1p but is not a substrate of calcineurin (unlike Frt1p), promotes growth in conditions of high Na+, alkaline pH, or cell wall stress; potential Cdc28p substrate
YAL037W		293.667	46.5772	1.11238	240.689	50.7565	52.9786	0.0639949	0.9117	-0.141721	263.642	31.6566	30.0254	0.14831	0.998644	-0.0714623	227.737	19.2445	65.9305	0.00167223	0.86264	-0.127375	Uncharacterized
YAL051W	OAF1	287.362	24.0059	1.08849	246.379	38.8631	40.9827	0.0509595	0.933256	-0.0975475	265.776	19.4736	21.586	0.0721951	1.00673	-0.0404024	221.917	16.2623	65.4455	1.60909e-05	0.840594	-0.128165	Oleate-activated transcription factor, acts alone and as a heterodimer with Pip2p; activates genes involved in beta-oxidation of fatty acids and peroxisome organization and biogenesis
YAL068C		271.446	32.024	1.02821	241.346	22.5702	30.1	0.045957	0.91419	-0.0595202	250.088	25.0593	21.3584	0.162115	0.947302	-0.0418311	177.854	41.7822	93.5917	0.00125423	0.673691	-0.241411	Hypothetical protein of unknown function; YAL068C is not an essential gene
YAR002C-A	ERP1	254.407	22.9062	0.963661	203.233	27.8123	51.1733	0.00432556	0.769823	-0.142764	224.64	17.0697	29.7666	0.013135	0.850909	-0.0761331	216.218	8.06807	38.1889	0.000839202	0.819006	-0.0386523	Protein that forms a heterotrimeric complex with Erp2p, Emp24p, and Erv25p; member, along with Emp24p and Erv25p, of the p24 family involved in ER to Golgi transport and localized to COPII-coated vesicles
YBL015W	ACH1	300.297	19.199	1.13749	345.045	12.3447	-44.7488	6.02172e-05	1.30699	0.22979	315.372	19.6501	-15.0757	0.163558	1.19459	0.10033	299.94	36.8303	0.356585	0.983099	1.13614	0.123773	Protein with CoA transferase activity, particularly for CoASH transfer from succinyl-CoA to acetate; has minor acetyl-CoA-hydrolase activity; phosphorylated; required for acetate utilization and for diploid pseudohyphal growth
YBL016W	FUS3	169.603	40.5942	0.642434	172.307	13.9849	-2.70441	0.850558	0.652678	0.044293	201.234	18.1684	-31.6314	0.0519958	0.76225	0.144228	234.434	21.625	-64.8313	0.00097134	0.888007	0.316241	Mitogen-activated serine/threonine protein kinase involved in mating; phosphoactivated by Ste7p; substrates include Ste12p, Far1p, Bni1p, Sst2p; inhibits invasive growth during mating by phosphorylating Tec1p, promoting its degradation
YBL027W	RPL19B	239.481	51.0644	0.907126	196.309	26.0992	43.1719	0.0427326	0.743596	-0.115452	236.772	44.8144	2.70975	0.913442	0.896862	0.0242066	158.005	26.7366	81.4765	0.000941207	0.598503	-0.208839	Protein component of the large (60S) ribosomal subunit, nearly identical to Rpl19Ap and has similarity to rat L19 ribosomal protein; rpl19a and rpl19b single null mutations result in slow growth, while the double null mutation is lethal
YBL055C		288.728	30.001	1.09367	227.626	35.4491	61.1015	0.00611502	0.862221	-0.173481	254.618	30.9007	34.1098	0.0549837	0.964463	-0.0876444	221.924	28.5028	66.8039	0.000952754	0.840621	-0.132742	3'-->5' exonuclease and endonuclease with a possible role in apoptosis; has similarity to mammalian and C. elegans apoptotic nucleases
YBL066C	SEF1	252.291	33.8408	0.955648	197.692	18.5589	54.5992	0.000959644	0.748833	-0.156166	225.096	9.39629	27.1952	0.0354767	0.852636	-0.0666975	204.97	60.1945	47.3213	0.121212	0.776401	-0.074126	Putative transcription factor, has homolog in Kluyveromyces lactis
YBL098W	BNA4	263.896	27.5154	0.999605	217.886	11.1717	46.0098	0.000438898	0.825326	-0.1213	233.469	14.5778	30.4268	0.0120253	0.884352	-0.0772681	223.623	34.0223	40.2726	0.0365234	0.847057	-0.0425913	Kynurenine 3-mono oxygenase, required for the de novo biosynthesis of NAD from tryptophan via kynurenine; expression regulated by Hst1p; putative therapeutic target for Huntington disease
YBR019C	GAL10	291.049	25.0147	1.10246	238.379	20.8353	52.6702	0.000802205	0.902951	-0.141078	267.961	9.99261	23.0882	0.0297421	1.015	-0.0455617	252.347	34.4909	38.7025	0.0439192	0.955859	-0.02533	UDP-glucose-4-epimerase, catalyzes the interconversion of UDP-galactose and UDP-D-glucose in galactose metabolism; also catalyzes the conversion of alpha-D-glucose or alpha-D-galactose to their beta-anomers
YBR022W	POA1	294.684	19.8518	1.11623	230.253	23.2569	64.4314	0.000270226	0.87217	-0.184898	270.284	20.4771	24.4007	0.0408562	1.0238	-0.0500101	279.144	49.9748	15.5402	0.494195	1.05736	0.0639208	Phosphatase that is highly specific for ADP-ribose 1''-phosphate, a tRNA splicing metabolite; may have a role in regulation of tRNA splicing
YBR023C	CHS3	317.973	29.9476	1.20444	245.306	20.5864	72.6666	5.75292e-05	0.929189	-0.211417	267.532	7.74283	50.4407	0.000413947	1.01338	-0.145294	319.413	47.5994	-1.44079	0.94862	1.2099	0.137946	Chitin synthase III, catalyzes the transfer of N-acetylglucosamine (GlcNAc) to chitin; required for synthesis of the majority of cell wall chitin, the chitin ring during bud emergence, and spore wall chitosan
YBR026C	ETR1	173.043	20.5383	0.655468	179.098	19.1643	-6.05476	0.571627	0.678402	0.0576745	207.682	15.5805	-34.639	0.00274713	0.786676	0.156116	223.247	29.2215	-50.2031	0.00613082	0.845631	0.262265	2-enoyl thioester reductase, member of the medium chain dehydrogenase/reductase family; localized to in mitochondria, where it has a probable role in fatty acid synthesis
YBR030W		299.068	18.6875	1.13283	330.154	33.3751	-31.0864	0.0750722	1.25058	0.177792	351.455	19.628	-52.3871	0.000339968	1.33127	0.241484	318.484	40.4226	-19.4164	0.308441	1.20638	0.198158	Ribosomal lysine methyltransferase specific for monomethylation of Rpl42ap and Rpl42bp (lysine 40); nuclear SET domain containing protein
YBR034C	HMT1	257.02	23.8074	0.97356	183.427	16.4273	73.5924	8.45469e-06	0.694801	-0.22716	217.447	13.8069	39.5733	0.00136392	0.823661	-0.112904	175.448	4.31562	81.572	3.89114e-06	0.664575	-0.201893	Nuclear SAM-dependent mono- and asymmetric arginine dimethylating methyltransferase that modifies hnRNPs, including Npl3p and Hrp1p, thus facilitating nuclear export of these proteins; required for viability of npl3 mutants
YBR036C	CSG2	184.957	73.5568	0.700594	124.017	21.4864	60.9393	0.0315913	0.469763	-0.193699	106.628	26.4234	78.3291	0.00976988	0.403893	-0.270078	155.923	36.0676	29.0342	0.309828	0.590616	-0.0329129	Endoplasmic reticulum membrane protein, required for mannosylation of inositolphosphorylceramide and for growth at high calcium concentrations
YBR042C	CST26	261.352	31.2883	0.989969	207.074	15.7081	54.2783	0.000426904	0.78437	-0.153131	238.054	22.1051	23.2979	0.104724	0.90172	-0.0506308	218.148	8.14505	43.2035	0.00167943	0.82632	-0.0547528	Protein required for incorporation of stearic acid into phosphatidylinositol, affects chromosome stability when overexpressed
YBR047W	FMP23	263.3	21.9017	0.997349	202.512	19.2848	60.7883	9.07638e-05	0.76709	-0.177399	232.023	22.1343	31.2775	0.0196228	0.878874	-0.080576	189.162	26.9708	74.1379	0.00029943	0.716523	-0.171117	Putative protein of unknown function; proposed to be involved in iron or copper homeostatis; the authentic, non-tagged protein is detected in highly purified mitochondria in high-throughput studies
YBR054W	YRO2	273.464	26.2907	1.03585	262.495	34.1037	10.9688	0.516567	0.994299	0.0133514	269.42	29.4711	4.04369	0.787973	1.02053	0.0240452	206.874	32.3284	66.5892	0.00209893	0.783615	-0.138289	Putative protein of unknown function; the authentic, non-tagged protein is detected in a phosphorylated state in highly purified mitochondria in high-throughput studies; transcriptionally regulated by Haa1p
YBR068C	BAP2	263.738	32.1509	0.999007	221.696	19.2124	42.0416	0.00748794	0.839758	-0.106301	218.305	28.3385	45.4325	0.0139935	0.826914	-0.13413	199.282	17.6335	64.4561	0.00026351	0.754855	-0.134261	High-affinity leucine permease, functions as a branched-chain amino acid permease involved in the uptake of leucine, isoleucine and valine; contains 12 predicted transmembrane domains
YBR073W	RDH54	255.583	32.5098	0.968118	200.133	27.9998	55.45	0.00360144	0.75808	-0.158728	211.533	24.3106	44.0499	0.00866222	0.801262	-0.130067	199.778	17.8721	55.8056	0.000577368	0.756733	-0.104892	DNA-dependent ATPase, stimulates strand exchange by modifying the topology of double-stranded DNA; involved in recombinational repair of DNA double-strand breaks during mitosis and meiosis; proposed to be involved in crossover interference
YBR074W		255.378	24.424	0.967343	202.332	11.6202	53.046	0.000106764	0.766411	-0.149663	218.075	14.3235	37.3031	0.00259722	0.826043	-0.104541	192.929	30.6047	62.4495	0.00228193	0.730792	-0.130143	Uncharacterized
YBR083W	TEC1	267.046	26.6534	1.01154	204.423	15.1583	62.6224	3.32032e-05	0.77433	-0.183594	230.045	29.112	37.0004	0.029597	0.871383	-0.101715	209.427	38.0549	57.6185	0.011545	0.793284	-0.106983	Transcription factor required for full Ty1 expression, Ty1-mediated gene activation, and haploid invasive and diploid pseudohyphal growth; TEA/ATTS DNA-binding domain family member
YBR093C	PHO5	69.9502	15.8484	0.264963	50.197	28.9459	19.7532	0.170697	0.19014	-0.0607798	59.5399	20.2913	10.4104	0.317042	0.22553	-0.0293646	126.862	28.3772	-56.9114	0.00279826	0.480537	0.24472	Repressible acid phosphatase (1 of 3) that also mediates extracellular nucleotide-derived phosphate hydrolysis; secretory pathway derived cell surface glycoprotein; induced by phosphate starvation and coordinately regulated by PHO4 and PHO2
YBR121C	GRS1	234.988	25.6056	0.890107	301.252	30.1489	-66.2642	0.00137695	1.14111	0.298177	259.519	17.0642	-24.5309	0.0379391	0.983027	0.126744	249.966	28.5904	-14.9779	0.317221	0.946841	0.154646	Cytoplasmic and mitochondrial glycyl-tRNA synthase that ligates glycine to the cognate anticodon bearing tRNA; transcription termination factor that may interact with the 3'-end of pre-mRNA to promote 3'-end formation
YBR125C	PTC4	343.704	28.8352	1.30191	267.301	39.9568	76.4025	0.00334145	1.0125	-0.220402	314.075	19.0418	29.6287	0.0271085	1.18968	-0.0627573	296.011	44.9666	47.6922	0.0504037	1.12125	-0.0374427	Cytoplasmic type 2C protein phosphatase; identified as a high-copy number suppressor of the synthetic lethality of a cnb1 mpk1 double deletion; overexpression decreases high-osmolarity induced Hog1p phosphorylation and kinase activity
YBR150C	TBS1	263.381	29.8308	0.997655	211.462	19.3003	51.919	0.000872455	0.800992	-0.143787	230.858	28.547	32.5225	0.0527307	0.874463	-0.0852805	214.002	24.8243	49.3793	0.00374154	0.810612	-0.0773008	Putative protein of unknown function; the authentic, non-tagged protein is detected in highly purified mitochondria in high-throughput studies
YBR159W	IFA38	268.089	19.9868	1.01549	225.927	32.1966	42.162	0.0223132	0.855786	-0.105884	229.582	31.8165	38.5074	0.0310027	0.869629	-0.107273	197.936	26.923	70.1533	0.000465861	0.749758	-0.154028	Microsomal beta-keto-reductase; contains oleate response element (ORE) sequence in the promoter region; mutants exhibit reduced VLCFA synthesis, accumulate high levels of dihydrosphingosine, phytosphingosine and medium-chain ceramides
YBR161W	CSH1	281.85	61.3313	1.06762	248.358	28.7034	33.4919	0.162305	0.940752	-0.0702798	246.319	45.1649	35.5314	0.206757	0.933027	-0.0940194	204.92	36.7608	76.9302	0.00728626	0.776213	-0.173965	Probable catalytic subunit of a mannosylinositol phosphorylceramide (MIPC) synthase, forms a complex with probable regulatory subunit Csg2p; function in sphingolipid biosynthesis is overlapping with that of Sur1p
YBR172C	SMY2	258.541	47.262	0.979321	221.881	27.0687	36.6598	0.0686627	0.840458	-0.086959	259.753	22.9726	-1.21224	0.94622	0.983913	0.041806	189.978	36.0916	68.5626	0.00614865	0.719614	-0.151982	Protein of unknown function involved in COPII vesicle formation; interacts with the Sec23p/Sec24p subcomplex; overexpression suppresses the temperature sensitivity of a myo2 mutant; has similarity to S. pombe Mpd2
YBR189W	RPS9B	61.2122	21.769	0.231865	45.1846	22.2107	16.0277	0.195688	0.171154	-0.048422	72.4803	16.7568	-11.268	0.279559	0.274546	0.0514928	131.069	41.5374	-69.8563	0.00709795	0.496472	0.290112	Protein component of the small (40S) ribosomal subunit; nearly identical to Rps9Ap and has similarity to E. coli S4 and rat S9 ribosomal proteins
YBR200W	BEM1	193.839	64.6038	0.734238	255.607	22.8183	-61.7676	0.017361	0.968207	0.272883	267.541	26.2833	-73.7021	0.00712014	1.01341	0.307076	287.21	39.6779	-93.3708	0.00302399	1.08792	0.434444	Protein containing SH3-domains, involved in establishing cell polarity and morphogenesis; functions as a scaffold protein for complexes that include Cdc24p, Ste5p, Ste20p, and Rsr1p
YBR205W	KTR3	270.047	34.2907	1.0229	253.297	19.3954	16.7498	0.232695	0.959458	-0.00923217	248.68	32.4134	21.3669	0.237229	0.941969	-0.0420649	205.749	27.9379	64.2979	0.00139954	0.779352	-0.131033	Putative alpha-1,2-mannosyltransferase involved in O- and N-linked protein glycosylation; member of the KRE2/MNT1 mannosyltransferase family
YBR241C		287.998	39.35	1.0909	230.078	28.9093	57.92	0.00606252	0.871507	-0.161576	272.814	36.1792	15.1836	0.457572	1.03339	-0.0160593	230.444	31.4955	57.5543	0.00832038	0.872892	-0.0980095	Uncharacterized
YBR245C	ISW1	275.67	43.4788	1.0442	259.349	16.5119	16.3207	0.306591	0.982382	-0.00647818	260.954	33.1241	14.7156	0.459073	0.988462	-0.0160614	155.716	17.5821	119.953	3.46591e-06	0.589835	-0.339506	Member of the imitation-switch (ISWI) class of ATP-dependent chromatin remodeling complexes; ATPase that forms a complex with Ioc2p and Ioc4p to regulate transcription elongation, and a complex with Ioc3p to repress transcription initiation
YBR246W		253.792	22.9287	0.961333	223.587	29.329	30.2053	0.0603329	0.846919	-0.0634635	245.243	22.1671	8.54896	0.476458	0.928951	0.00414824	137.549	4.22898	116.243	2.42685e-08	0.52102	-0.334567	Putative protein of unknown function; non-essential gene identified in a screen for mutants with increased levels of rDNA transcription; null mutants display a weak carboxypeptidase Y missorting/secretion phenotype
YBR261C		255.691	18.71	0.968526	218.668	16.7705	37.0228	0.00185663	0.828288	-0.0889061	215.226	16.6388	40.4654	0.000926498	0.815248	-0.116474	188.837	35.7661	66.8536	0.00418314	0.715293	-0.146696	Putative S-adenosylmethionine-dependent methyltransferase of the seven beta-strand family; has a role in protein synthesis; green fluorescent protein (GFP)-fusion protein localizes to the cytoplasm; YBR261C is not an essential gene
YBR263W	SHM1	279.466	29.6068	1.05858	256.366	26.4867	23.0998	0.141191	0.971083	-0.0313943	265.837	29.5137	13.6291	0.400411	1.00696	-0.0113994	212.91	12.5392	66.5557	7.44728e-05	0.806478	-0.135661	Mitochondrial serine hydroxymethyltransferase, converts serine to glycine plus 5,10 methylenetetrahydrofolate; involved in generating precursors for purine, pyrimidine, amino acid, and lipid biosynthesis; reverse reaction generates serine
YBR264C	YPT10	259.094	22.0348	0.981418	207.594	19.6012	51.5004	0.000506613	0.786341	-0.143062	229.219	35.9956	29.8751	0.108891	0.868255	-0.0758695	180.835	23.0452	78.2595	5.07921e-05	0.68498	-0.188482	GTP binding protein that contains the PEST signal sequence specific for proteolytic enzymes; may be involved in vesicular transport; overexpression leads to accumulation of Golgi-like cisternae with budding vesicles
YBR266C	SLM6	136.155	19.182	0.51574	114.842	21.7778	21.3134	0.0770825	0.435007	-0.0533982	137.176	29.5561	-1.02064	0.941715	0.519606	0.0234642	189.675	20.7521	-53.52	0.000442434	0.718467	0.259458	Protein with a potential role in actin cytoskeleton organization; gene exhibits synthetic genetic interaction with MSS4 encoding phosphatidylinositol 4-phosphate kinase
YBR267W	REI1	96.3265	19.425	0.364873	122.053	23.3068	-25.7266	0.0509167	0.462322	0.116787	112.427	10.2343	-16.1008	0.0576233	0.425861	0.074853	178.564	31.035	-82.2376	0.000494822	0.676379	0.351642	Cytoplasmic pre-60S factor; required for the correct recycling of shuttling factors Alb1, Arx1 and Tif6 at the end of the ribosomal large subunit biogenesis; involved in bud growth in the mitotic signaling network
YBR275C	RIF1	255.035	15.6208	0.966043	215.727	27.5501	39.308	0.0151536	0.817149	-0.0976937	213.324	18.8889	41.7109	0.00134024	0.808047	-0.121286	227.97	22.6763	27.065	0.032998	0.863524	0.00374563	Protein that binds to the Rap1p C-terminus and acts synergistically with Rif2p to help control telomere length and establish telomeric silencing; deletion results in telomere elongation
YCL001W	RER1	270.94	25.4932	1.02629	220.371	30.9884	50.5689	0.00817216	0.834739	-0.137156	255.199	23.3912	15.7409	0.232925	0.966663	-0.0206258	203.944	19.0433	66.9964	4.41755e-05	0.772514	-0.140882	Protein involved in retention of membrane proteins, including Sec12p, in the ER; localized to Golgi; functions as a retrieval receptor in returning membrane proteins to the ER
YCL010C	SGF29	215.066	49.3174	0.814643	243.265	16.8629	-28.1993	0.123936	0.921459	0.149992	236.851	15.4095	-21.7854	0.220313	0.897164	0.113477	142.06	25.5881	73.0055	0.00166389	0.538107	-0.186925	Probable subunit of SAGA histone acetyltransferase complex
YCR007C		268.412	19.4329	1.01671	246.036	13.3594	22.3758	0.0203562	0.931956	-0.030871	248.778	21.3367	19.6344	0.100238	0.94234	-0.0357378	205.384	21.6341	63.0279	0.000183008	0.777971	-0.126904	Uncharacterized
YCR010C	ADY2	284.736	28.2401	1.07854	254.282	37.194	30.4537	0.11992	0.96319	-0.058192	258.07	37.5457	26.6655	0.169298	0.977539	-0.0600212	220.945	25.3986	63.7911	0.000598565	0.836911	-0.122993	Acetate transporter required for normal sporulation; phosphorylated in mitochondria
YCR011C	ADP1	274.215	25.0186	1.03869	263.555	27.6375	10.66	0.457428	0.998313	0.0146719	266.821	26.3141	7.39412	0.591347	1.01068	0.0114623	212.003	14.9209	62.2112	2.20757e-05	0.803044	-0.121392	Putative ATP-dependent permease of the ABC transporter family of proteins
YCR034W	FEN1	307.823	24.0602	1.166	370.357	13.4088	-62.5341	1.06419e-05	1.40287	0.298669	373.895	46.5402	-66.0725	0.0155893	1.41627	0.294583	290.494	50.099	17.3293	0.45551	1.10035	0.0626183	Fatty acid elongase, involved in sphingolipid biosynthesis; acts on fatty acids of up to 24 carbons in length; mutations have regulatory effects on 1,3-beta-glucan synthase, vacuolar ATPase, and the secretory pathway
YCR063W	BUD31	100.201	28.2433	0.379547	92.4507	24.0977	7.74981	0.570455	0.350192	-0.00923931	122.656	37.9936	-22.4554	0.243582	0.464606	0.0994811	206.699	62.7851	-106.499	0.00719574	0.782951	0.445154	Component of the SF3b subcomplex of the U2 snRNP; diploid mutants display a random budding pattern instead of the wild-type bipolar pattern
YCR067C	SED4	302.679	22.8138	1.14651	215.219	15.9184	87.4608	4.41932e-07	0.815222	-0.270526	269.172	20.2902	33.5074	0.0103296	1.01959	-0.0833544	242.12	28.1234	60.5596	0.00158407	0.91712	-0.103276	Integral endoplasmic reticulum membrane protein, functions as a positive regulator of Sar1p probably through inhibition of GTPase activation by Sec23p; binds Sec16p, participates in vesicle formation, similar to Sec12p
YCR086W	CSM1	236.492	22.4427	0.895801	186.381	24.9544	50.1103	0.00249959	0.70599	-0.142334	233.891	23.5749	2.60072	0.832104	0.88595	0.0241892	173.528	8.77527	62.9637	2.91881e-06	0.657302	-0.139961	Nucleolar protein that forms a complex with Lrs4p and then Mam1p at kinetochores during meiosis I to mediate accurate homolog segregation; required for condensin recruitment to the replication fork barrier site and rDNA repeat segregation
YDL002C	NHP10	171.826	54.9837	0.650857	171.571	20.1092	0.254885	0.989635	0.649891	0.0335299	188.778	18.7432	-16.9517	0.389729	0.715068	0.0889436	288.503	40.2033	-116.677	0.000284805	1.09281	0.513552	Protein related to mammalian high mobility group proteins; likely component of the INO80 complex, which is an ATP-dependent chromatin-remodeling complex
YDL006W	PTC1	106.283	25.72	0.402587	66.1221	22.7628	40.161	0.0071009	0.250462	-0.130788	102.722	12.2646	3.56144	0.714981	0.389097	0.00180802	79.9119	15.0644	26.3711	0.0215499	0.302697	-0.0556059	Type 2C protein phosphatase (PP2C); inactivates the osmosensing MAPK cascade by dephosphorylating Hog1p; mutation delays mitochondrial inheritance; deletion reveals defects in precursor tRNA splicing, sporulation and cell separation
YDL012C		281.662	29.3922	1.0669	252.004	27.2294	29.658	0.069578	0.954559	-0.0557954	263.981	25.2696	17.6802	0.237732	0.999929	-0.0264283	218.095	18.7419	63.5668	0.000199056	0.826116	-0.123424	Uncharacterized
YDL061C	RPS29B	108.86	33.0498	0.41235	108.65	22.5305	0.209978	0.988185	0.411554	0.0210592	120.212	18.0627	-11.3521	0.389833	0.45535	0.0586697	171.33	19.8671	-62.4697	0.00032857	0.648977	0.281986	Protein component of the small (40S) ribosomal subunit; nearly identical to Rps29Ap and has similarity to rat S29 and E. coli S14 ribosomal proteins
YDL074C	BRE1	151.778	27.1361	0.574917	163.017	19.1996	-11.2386	0.350624	0.617488	0.073041	164.556	15.544	-12.7782	0.251078	0.62332	0.0702492	260.957	37.8284	-109.179	0.000247842	0.988475	0.476798	E3 ubiquitin ligase for Rad6p, required for the ubiquitination of histone H2B, recruitment of Rad6p to promoter chromatin and subsequent methylation of histone H3 (on K4 and K79), contains RING finger domain
YDL077C	VAM6	164.353	19.1368	0.62255	227.083	20.9482	-62.73	0.000146477	0.860163	0.270609	193.041	10.7338	-28.6884	0.00270807	0.731218	0.132325	235.808	37.2108	-71.4549	0.00366626	0.893212	0.339143	Vacuolar protein that plays a critical role in the tethering steps of vacuolar membrane fusion by facilitating guanine nucleotide exchange on small guanosine triphosphatase Ypt7p
YDL079C	MRK1	316.685	26.9115	1.19956	257.762	23.275	58.9233	0.000595695	0.97637	-0.159618	307.427	31.1885	9.25851	0.559758	1.16449	0.0105134	295.847	34.5609	20.8385	0.238947	1.12063	0.0530186	Glycogen synthase kinase 3 (GSK-3) homolog; one of four GSK-3 homologs in S. cerevisiae that function to activate Msn2p-dependent transcription of stress responsive genes and that function in protein degradation
YDL081C	RPP1A	140.019	31.1183	0.530377	153.561	20.6145	-13.5419	0.329183	0.581672	0.079405	143.894	27.9946	-3.87437	0.806156	0.545052	0.0348299	242.726	46.4921	-102.707	0.00145453	0.919418	0.447383	Ribosomal stalk protein P1 alpha, involved in the interaction between translational elongation factors and the ribosome; accumulation of P1 in the cytoplasm is regulated by phosphorylation and interaction with the P2 stalk component
YDL124W		287.017	33.3281	1.08719	256.552	36.4505	30.4651	0.126071	0.971787	-0.0577772	271.26	25.4497	15.7571	0.306444	1.0275	-0.0183729	216.454	28.3368	70.5633	0.000699447	0.8199	-0.147695	NADPH-dependent alpha-keto amide reductase; reduces aromatic alpha-keto amides, aliphatic alpha-keto esters, and aromatic alpha-keto esters; member of the aldo-keto reductase (AKR) family
YDL131W	LYS21	270.16	36.5414	1.02333	233.741	30.3499	36.419	0.0575612	0.885383	-0.0837142	220.431	14.7661	49.7295	0.00359395	0.834964	-0.149483	215.281	12.8005	54.8789	0.0017623	0.815459	-0.0953078	Homocitrate synthase isozyme, catalyzes the condensation of acetyl-CoA and alpha-ketoglutarate to form homocitrate, which is the first step in the lysine biosynthesis pathway; highly similar to the other isozyme, Lys20p
YDL134C	PPH21	268.242	25.0016	1.01607	210.779	23.9826	57.4629	0.000907841	0.798405	-0.163811	236.42	17.6246	31.8214	0.0127278	0.895532	-0.0819252	220.82	18.9873	47.4221	0.00116817	0.836439	-0.0678617	Catalytic subunit of protein phosphatase 2A, functionally redundant with Pph22p; methylated at C terminus; forms alternate complexes with several regulatory subunits; involved in signal transduction and regulation of mitosis
YDL154W	MSH5	293.236	15.2597	1.11074	276.34	23.2995	16.8953	0.156546	1.04674	-0.00512794	268.602	26.9287	24.6338	0.0805476	1.01743	-0.0511017	227.146	16.7762	66.0902	1.45855e-05	0.8604	-0.12816	Protein of the MutS family, forms a dimer with Msh4p that facilitates crossovers between homologs during meiosis; msh5-Y823H mutation confers tolerance to DNA alkylating agents; homologs present in C. elegans and humans
YDL189W	RBS1	310.05	26.3467	1.17443	252.956	35.9595	57.0939	0.00916221	0.958167	-0.15402	294.2	34.9363	15.8501	0.363924	1.11439	-0.01541	297.743	27.8637	12.3068	0.402887	1.12781	0.0825707	Protein of unknown function, identified as a high copy suppressor of psk1 psk2 mutations that confer temperature-sensitivity for galactose utilization; proposed to bind single-stranded nucleic acids via its R3H domain
YDL190C	UFD2	232.89	19.6697	0.882158	174.017	19.328	58.8726	0.000130181	0.659156	-0.176248	210.685	15.6415	22.2052	0.0312907	0.798048	-0.0505886	200.705	16.9768	32.1844	0.00555663	0.760248	-0.0248733	Ubiquitin chain assembly factor (E4) that cooperates with a ubiquitin-activating enzyme (E1), a ubiquitin-conjugating enzyme (E2), and a ubiquitin protein ligase (E3) to conjugate ubiquitin to substrates; also functions as an E3
YDL203C		298.397	34.1018	1.13029	225.782	25.8361	72.6151	0.000337197	0.855235	-0.215152	275.01	47.0137	23.3874	0.318367	1.0417	-0.0456377	272.75	20.7189	25.6468	0.0824023	1.03315	0.0271851	Protein that functions upstream of Pkc1p in the cell wall integrity pathway; GFP-fusion protein expression is induced in response to the DNA-damaging agent MMS; non-tagged Ack1p is detected in purified mitochondria
YDL222C	FMP45	261.062	28.4382	0.988873	203.903	28.4966	57.1597	0.00268822	0.772359	-0.164104	247.019	12.5513	14.0429	0.197483	0.93568	-0.0156156	239.993	23.9545	21.0697	0.13835	0.909063	0.0289665	Integral membrane protein localized to mitochondria (untagged protein); required for sporulation and maintaining sphingolipid content; has sequence similarity to SUR7 and YNL194C
YDL232W	OST4	126.978	21.48	0.480976	151.52	41.7792	-24.5427	0.225396	0.573941	0.118457	198.489	56.3153	-71.511	0.0251185	0.751851	0.289152	244.27	49.9019	-117.292	0.00146309	0.925265	0.497196	Subunit of the oligosaccharyltransferase complex of the ER lumen, which catalyzes protein asparagine-linked glycosylation; type I membrane protein required for incorporation of Ost3p or Ost6p into the OST complex
YDL236W	PHO13	302.846	29.1729	1.14714	230.245	37.1183	72.6011	0.00295575	0.87214	-0.214205	277.187	32.6407	25.6594	0.150966	1.04995	-0.0536033	264.119	19.0197	38.7268	0.00825343	1.00045	-0.0205064	Alkaline phosphatase specific for p-nitrophenyl phosphate; also has protein phosphatase activity
YDR009W	GAL3	263.288	50.2596	0.997304	220.37	9.22901	42.9185	0.0253006	0.834734	-0.109713	219.976	14.9564	43.3124	0.0266313	0.833242	-0.126164	200.57	30.0905	62.7179	0.0075035	0.759736	-0.127864	Transcriptional regulator involved in activation of the GAL genes in response to galactose; forms a complex with Gal80p to relieve Gal80p inhibition of Gal4p; binds galactose and ATP but does not have galactokinase activity
YDR051C		277.579	33.9083	1.05144	298.062	29.5128	-20.4823	0.228374	1.12902	0.133311	257.229	22.7067	20.3507	0.173508	0.974351	-0.0371312	212.732	14.3892	64.847	0.000139616	0.805804	-0.129975	Protein involved in the non-vesicular transport of sterols in both directions between the endoplasmic reticulum and plasma membrane; deletion confers sensitivity to nickel
YDR055W	PST1	279.838	27.6325	1.05999	291.898	32.7324	-12.0606	0.475327	1.10568	0.101863	256.667	27.4299	23.1707	0.138527	0.972224	-0.0474883	209.651	20.3728	70.1863	8.39305e-05	0.794134	-0.149258	Cell wall protein that contains a putative GPI-attachment site; secreted by regenerating protoplasts; up-regulated by activation of the cell integrity pathway, as mediated by Rlm1p; upregulated by cell wall damage via disruption of FKS1
YDR072C	IPT1	303.101	43.057	1.14811	361.856	13.1062	-58.7551	0.00185898	1.37067	0.283407	301.564	11.0116	1.53648	0.916623	1.14229	0.0378081	259.859	22.2407	43.2418	0.0194551	0.984314	-0.0375026	Inositolphosphotransferase, involved in synthesis of mannose-(inositol-P)2-ceramide (M(IP)2C), the most abundant sphingolipid;, can mutate to resistance to the antifungals syringomycin E and DmAMP1 and to K. lactis zymocin
YDR074W	TPS2	122.027	49.5753	0.462225	107.536	38.0901	14.4914	0.523167	0.407334	-0.0303936	158.833	33.2324	-36.8053	0.0980684	0.601639	0.156979	232.369	37.6165	-110.341	0.000230985	0.880184	0.468803	Phosphatase subunit of the trehalose-6-phosphate synthase/phosphatase complex, which synthesizes the storage carbohydrate trehalose; expression is induced by stress conditions and repressed by the Ras-cAMP pathway
YDR075W	PPH3	310.821	34.7944	1.17735	262.071	26.7834	48.7502	0.00943863	0.992691	-0.12226	301.947	49.8732	8.87393	0.714491	1.14374	0.011126	302.196	31.754	8.6248	0.629293	1.14468	0.096839	Catalytic subunit of an evolutionarily conserved protein phosphatase complex containing Psy2p and the regulatory subunit Psy4p; required for cisplatin resistance; involved in activation of Gln3p
YDR083W	RRP8	132.48	16.2019	0.501816	120.642	24.0181	11.838	0.321046	0.456975	-0.0182447	158.593	14.6954	-26.1134	0.00743384	0.600731	0.117983	197.085	18.9181	-64.6051	5.30038e-05	0.746533	0.299916	Nucleolar protein involved in rRNA processing, pre-rRNA cleavage at site A2; also involved in telomere maintenance; mutation is synthetically lethal with a gar1 mutation
YDR097C	MSH6	272.908	19.6504	1.03374	188.253	25.6418	84.655	8.53712e-05	0.713081	-0.265874	243.579	19.8015	29.3297	0.0155963	0.922647	-0.071815	237.366	22.7963	35.5423	0.0106443	0.899114	-0.020918	Protein required for mismatch repair in mitosis and meiosis, forms a complex with Msh2p to repair both single-base & insertion-deletion mispairs; potentially phosphorylated by Cdc28p
YDR146C	SWI5	261.737	43.0536	0.991429	240.435	20.6184	21.3024	0.2051	0.910738	-0.0281452	217.029	24.971	44.7086	0.0198403	0.822078	-0.131676	189.364	15.757	72.3734	0.000394978	0.717287	-0.165084	Transcription factor that activates transcription of genes expressed at the M/G1 phase boundary and in G1 phase; localization to the nucleus occurs during G1 and appears to be regulated by phosphorylation by Cdc28p kinase
YDR173C	ARG82	58.1605	22.9287	0.220305	86.7949	35.7202	-28.6344	0.119143	0.328769	0.12014	116.138	32.9978	-57.9778	0.00538042	0.439918	0.227984	108.922	29.1498	-50.7611	0.00565787	0.412582	0.21651	Inositol polyphosphate multikinase (IPMK), sequentially phosphorylates Ins(1,4,5)P3 to form Ins(1,3,4,5,6)P5; also has diphosphoinositol polyphosphate synthase activity; regulates arginine-, phosphate-, and nitrogen-responsive genes
YDR174W	HMO1	104.658	15.9015	0.396432	157.235	45.8734	-52.5774	0.0366691	0.595588	0.220168	123.286	23.2941	-18.6276	0.124984	0.466991	0.0856234	205.771	25.8722	-101.113	3.84172e-05	0.779437	0.426613	Chromatin associated high mobility group (HMG) family member involved in genome maintenance; rDNA-binding component of the Pol I transcription system; associates with a 5'-3' DNA helicase and Fpr1p, a prolyl isomerase
YDR178W	SDH4	284.757	41.4091	1.07862	309.912	36.5697	-25.155	0.229734	1.17391	0.152451	271.71	22.0961	13.0465	0.425769	1.02921	-0.00843072	221.128	13.8165	63.6288	0.00078949	0.837606	-0.12237	Membrane anchor subunit of succinate dehydrogenase (Sdh1p, Sdh2p, Sdh3p, Sdh4p), which couples the oxidation of succinate to the transfer of electrons to ubiquinone
YDR179W-A		308.217	28.298	1.16749	257.205	29.6398	51.0117	0.00720026	0.974262	-0.131349	305.679	50.7567	2.5379	0.91433	1.15787	0.0347513	281.14	16.2634	27.0763	0.0356177	1.06493	0.0258619	Uncharacterized
YDR206W	EBS1	260.176	25.3126	0.985514	250.906	39.1727	9.26992	0.619048	0.950401	0.0171189	265.597	41.9452	-5.42078	0.782327	1.00605	0.0579828	326.817	38.7238	-66.6415	0.00605864	1.23794	0.360837	Protein involved in inhibition of translation and nonsense-mediated decay; interacts with cap binding protein Cdc33p and with Nam7p; localizes to P-bodies upon glucose starvation; mRNA abundance regulated by mRNA decay factors
YDR223W	CRF1	276.369	33.212	1.04685	251.823	28.6804	24.5461	0.153676	0.953876	-0.0374944	256.199	31.7315	20.1701	0.261	0.970451	-0.0366216	213.388	33.3643	62.9816	0.00435936	0.808287	-0.123413	Transcriptional corepressor involved in the regulation of ribosomal protein gene transcription via the TOR signaling pathway and protein kinase A, phosphorylated by activated Yak1p which promotes accumulation of Crf1p in the nucleus
YDR225W	HTA1	227.552	22.4885	0.861939	217.245	25.1148	10.307	0.428607	0.822898	0.00664122	214.383	13.238	13.1685	0.162536	0.812058	-0.0171272	322.197	52.9421	-94.6446	0.00573343	1.22044	0.453316	Histone H2A, core histone protein required for chromatin assembly and chromosome function; one of two nearly identical subtypes (see also HTA2); DNA damage-dependent phosphorylation by Mec1p facilitates DNA repair; acetylated by Nat4p
YDR245W	MNN10	129.026	58.365	0.488734	131.361	47.2142	-2.33495	0.931662	0.497578	0.0347474	172.497	46.8151	-43.4712	0.126546	0.653397	0.183235	294.766	46.7279	-165.74	3.44483e-05	1.11654	0.681565	Subunit of a Golgi mannosyltransferase complex also containing Anp1p, Mnn9p, Mnn11p, and Hoc1p that mediates elongation of the polysaccharide mannan backbone; membrane protein of the mannosyltransferase family
YDR253C	MET32	247.708	13.9024	0.938287	213.494	48.7884	34.2134	0.149389	0.80869	-0.079867	177.463	20.2758	70.245	6.99353e-05	0.672207	-0.230425	232.881	9.42043	14.8268	0.0285957	0.882125	0.0470495	Zinc-finger DNA-binding protein, involved in transcriptional regulation of the methionine biosynthetic genes, similar to Met31p
YDR254W	CHL4	246.221	25.83	0.932654	234.914	30.0532	11.3067	0.500904	0.889825	0.00660223	204.81	14.1276	41.4107	0.00919821	0.775795	-0.121418	235.358	24.8854	10.863	0.475256	0.891506	0.0614443	Outer kinetochore protein required for chromosome stability, interacts with kinetochore proteins Ctf19p, Ctf3p, and Iml3p; exhibits a two-hybrid interaction with Mif2p; association with CEN DNA requires Ctf19p
YDR255C	RMD5	262.244	28.6162	0.99335	247.901	35.0908	14.3436	0.425555	0.939018	-0.00168432	213.447	23.0791	48.7974	0.00323187	0.808511	-0.147091	243.788	29.2948	18.4565	0.253666	0.923439	0.0393573	Conserved protein that has an E3-like ubiquitin ligase activity necessary for polyubiquitination and degradation of the gluconeogenic enzyme fructose-1,6-bisphosphatase; also required for sporulation; has a degenerate RING finger domain
YDR258C	HSP78	270.581	26.8233	1.02493	274.791	46.8373	-4.20988	0.847426	1.04088	0.0702678	220.249	17.3734	50.3319	0.000704362	0.834278	-0.151704	236.476	15.8497	34.1052	0.00867165	0.895743	-0.0164441	Oligomeric mitochondrial matrix chaperone that cooperates with Ssc1p in mitochondrial thermotolerance after heat shock; able to prevent the aggregation of misfolded proteins as well as resolubilize protein aggregates
YDR260C	SWM1	276.612	34.8782	1.04777	255.462	28.7867	21.1498	0.213282	0.96766	-0.0245808	220.431	23.4904	56.1815	0.00186063	0.834964	-0.172993	256.099	29.2718	20.5127	0.23072	0.970074	0.0375555	Subunit of the anaphase-promoting complex, which is an E3 ubiquitin ligase that regulates the metaphase-anaphase transition and exit from mitosis; required for activation of the daughter-specific gene expression and spore wall maturation
YDR261C	EXG2	273.213	39.4524	1.0349	266.244	33.9337	6.96898	0.715061	1.0085	0.028452	214.693	17.5497	58.5208	0.00127156	0.81323	-0.182343	232.64	29.3869	40.573	0.0354369	0.881214	-0.0398468	Exo-1,3-beta-glucanase, involved in cell wall beta-glucan assembly; may be anchored to the plasma membrane via a glycosylphosphatidylinositol (GPI) anchor
YDR270W	CCC2	275.867	24.2559	1.04495	266.065	38.2112	9.80278	0.589341	1.00782	0.0182508	188.377	27.0832	87.4905	7.84078e-05	0.713549	-0.291695	210.606	29.9025	65.261	0.00145285	0.797752	-0.132256	Cu(+2)-transporting P-type ATPase, required for export of copper from the cytosol into an extracytosolic compartment; has similarity to human proteins involved in Menkes and Wilsons diseases
YDR272W	GLO2	253.476	32.0668	0.960137	206.864	9.18149	46.6125	0.00117046	0.783575	-0.125675	190.913	27.7469	62.5634	0.00144341	0.723155	-0.200497	205.578	23.5828	47.8978	0.00442004	0.778706	-0.0758161	Cytoplasmic glyoxalase II, catalyzes the hydrolysis of S-D-lactoylglutathione into glutathione and D-lactate
YDR273W	DON1	251.256	15.1812	0.951728	192.755	26.4983	58.5013	0.0016128	0.730133	-0.171154	188.765	16.3242	62.4909	1.82354e-05	0.71502	-0.200542	208.372	16.7964	42.8847	0.000502668	0.789286	-0.0577519	Meiosis-specific component of the spindle pole body, part of the leading edge protein (LEP) coat, forms a ring-like structure at the leading edge of the prospore membrane during meiosis II
YDR275W	BSC2	295.876	47.5868	1.12074	251.707	30.0959	44.1691	0.0394037	0.953437	-0.107908	211.366	31.1632	84.5107	0.000775282	0.800628	-0.277528	213.523	50.0075	82.3531	0.00851289	0.8088	-0.188662	Protein of unknown function, ORF exhibits genomic organization compatible with a translational readthrough-dependent mode of expression
YDR277C	MTH1	241.577	35.7843	0.915066	216.64	13.1589	24.9379	0.0690376	0.820604	-0.0459633	175.928	16.7272	65.6498	0.000229168	0.666393	-0.213901	178.531	19.899	63.046	0.000476541	0.676256	-0.138153	Negative regulator of the glucose-sensing signal transduction pathway, required for repression of transcription by Rgt1p; interacts with Rgt1p and the Snf3p and Rgt2p glucose sensors; phosphorylated by Yck1p, triggering Mth1p degradation
YDR281C	PHM6	267.646	23.6612	1.01381	276.661	48.8976	-9.01489	0.686166	1.04796	0.0878793	200.282	18.4312	67.364	2.7161e-05	0.758644	-0.216642	225.212	24.1557	42.4336	0.00603934	0.853078	-0.0492142	Protein of unknown function, expression is regulated by phosphate levels
YDR282C		265.235	22.4272	1.00468	275.661	42.1959	-10.4256	0.593849	1.04417	0.0927389	213.761	11.8599	51.4738	3.38102e-05	0.809702	-0.156799	224.116	14.3936	41.1188	0.000548152	0.848925	-0.0452385	Uncharacterized
YDR286C		271.147	19.8305	1.02707	289.69	31.8369	-18.5427	0.241016	1.09731	0.124672	214.973	16.9436	56.1738	7.50602e-05	0.814293	-0.173751	236.53	34.6439	34.6173	0.061028	0.895946	-0.0181482	Uncharacterized
YDR287W	INM2	272.486	38.162	1.03214	278.005	36.9829	-5.51935	0.780549	1.05305	0.0756102	220.716	29.1289	51.7694	0.0092266	0.836046	-0.156875	229.063	28.8843	43.4227	0.0231115	0.867663	-0.0509443	Inositol monophosphatase, involved in biosynthesis of inositol; enzymatic activity requires magnesium ions and is inhibited by lithium and sodium ions; inm1 inm2 double mutant lacks inositol auxotrophy
YDR289C	RTT103	259.645	45.0914	0.983503	241.731	27.6796	17.9138	0.341586	0.915647	-0.0157298	192.769	18.7858	66.8761	0.00118324	0.730184	-0.215946	256.19	49.8385	3.45516	0.892213	0.970415	0.0950975	Protein that interacts with exonuclease Rat1p and Rai1p and plays a role in transcription termination by RNA polymerase II, has an RPR domain (carboxy-terminal domain interacting domain); also involved in regulation of Ty1 transposition
YDR291W		274.383	36.337	1.03933	284.274	30.2271	-9.89091	0.568094	1.07679	0.09255	201.044	16.5916	73.339	9.12796e-05	0.76153	-0.238305	223.932	28.8816	50.4509	0.00929146	0.848227	-0.0767758	Putative RecQ helicase; belongs to the widely conserved RecQ family of proteins which are involved in maintaining genomic integrity; similar to the human RecQ4p implicated in Rothmund-Thomson syndrome(RTS)
YDR294C	DPL1	267.826	35.1091	1.01449	285.185	29.4513	-17.3593	0.309322	1.08025	0.119523	182.38	12.0554	85.4455	1.33591e-05	0.690834	-0.285107	201.034	37.1314	66.7914	0.0050876	0.761494	-0.141404	Dihydrosphingosine phosphate lyase, regulates intracellular levels of sphingolipid long-chain base phosphates (LCBPs), degrades phosphorylated long chain bases, prefers C16 dihydrosphingosine-l-phosphate as a substrate
YDR297W	SUR2	294.207	43.866	1.11442	346.981	21.6428	-52.7746	0.00645043	1.31432	0.258968	221.708	26.313	72.4985	0.001019	0.839804	-0.232267	243.583	30.7212	50.6237	0.0174709	0.922663	-0.0691704	Sphinganine C4-hydroxylase, catalyses the conversion of sphinganine to phytosphingosine in sphingolipid biosyntheis
YDR309C	GIC2	326.182	21.8283	1.23554	258.916	41.514	67.2663	0.00855167	0.980742	-0.189313	162.772	21.8685	163.41	2.40297e-08	0.61656	linkage	208.813	107.4	117.369	0.043598	0.790957	linkage	Redundant rho-like GTPase Cdc42p effector; homolog of Gic1p; involved in initiation of budding and cellular polarization; interacts with Cdc42p via the Cdc42/Rac-interactive binding (CRIB) domain and with PI(4,5)P2 via a polybasic region
YDR319C		246.931	32.1151	0.935345	196.833	27.7835	50.0976	0.00647958	0.745581	-0.14019	51.214	12.959	195.717	3.25835e-10	0.193992	linkage	41.2425	7.77675	205.689	5.10654e-08	0.156221	linkage	YFT2
YDR320C	SWA2	267.594	34.5197	1.01362	199.961	19.5458	67.6331	0.000194049	0.757429	-0.202464	52.1	17.5173	215.494	1.74604e-10	0.197348	linkage	46.9195	35.2075	220.675	7.20236e-05	0.177725	linkage	Auxilin-like protein involved in vesicular transport; clathrin-binding protein required for uncoating of clathrin-coated vesicles
YDR333C		300.317	28.1644	1.13757	239.502	30.5432	60.8149	0.00285791	0.907206	-0.170068	120.926	21.5538	179.392	4.82567e-09	0.458052	linkage	206.61	84.5279	93.7071	0.041196	0.782614	linkage	Putative protein of unknown function
YDR334W	SWR1	261.847	13.9273	0.991847	210.545	25.0171	51.3026	0.00248208	0.797518	-0.14176	139.942	24.1644	121.906	7.94888e-06	0.530082	linkage	165.65	44.7102	96.1975	0.00262761	0.627462	linkage	Swi2/Snf2-related ATPase that is the structural component of the SWR1 complex, which exchanges histone variant H2AZ (Htz1p) for chromatin-bound histone H2A
YDR354W	TRP4	266.7	23.0615	1.01023	275.124	31.5633	-8.42412	0.588959	1.04214	0.0854515	208.046	21.2854	58.6532	0.000322404	0.788054	-0.183783	236.596	50.6938	30.1034	0.218734	0.896198	-0.00290313	Anthranilate phosphoribosyl transferase of the tryptophan biosynthetic pathway, catalyzes the phosphoribosylation of anthranilate, subject to the general control system of amino acid biosynthesis
YDR357C		276.056	21.7189	1.04567	265.037	37.6833	11.0197	0.533848	1.00393	0.0136793	218.42	20.1024	57.6365	0.000198012	0.827348	-0.178585	228.505	55.2018	47.5511	0.0905567	0.86555	-0.0650945	Uncharacterized
YDR358W	GGA1	278.565	20.168	1.05517	253.783	29.4841	24.7827	0.109445	0.961298	-0.0379496	198.24	12.4584	80.3253	3.18783e-07	0.75091	-0.264166	245.342	20.0896	33.2236	0.00962704	0.929325	-0.00977798	Golgi-localized protein with homology to gamma-adaptin, interacts with and regulates Arf1p and Arf2p in a GTP-dependent manner in order to facilitate traffic through the late Golgi
YDR360W	OPI7	245.949	41.1927	0.931623	206.215	34.3324	39.7336	0.0653415	0.781117	-0.10113	170.508	27.7864	75.4409	0.000976569	0.645862	-0.250359	159.286	65.6567	86.6624	0.02161	0.603356	-0.225788	Dubious open reading frame unlikely to encode a protein, based on available experimental and comparative sequence data; partially overlaps verified gene EAF1/VID21/YDR359C
YDR368W	YPR1	269.446	47.5836	1.02063	257.451	26.4625	11.9949	0.527773	0.975194	0.00865829	191.145	9.91966	78.3014	0.000479746	0.724033	-0.257812	237.685	71.4971	31.7607	0.362821	0.900324	-0.00803655	NADPH-dependent aldo-keto reductase, reduces multiple substrates including 2-methylbutyraldehyde and D,L-glyceraldehyde, expression is induced by osmotic and oxidative stress; functionally redundant with other aldo-keto reductases
YDR369C	XRS2	165.123	33.6149	0.625466	142.063	18.6311	23.06	0.0995247	0.538117	-0.0541989	119.549	12.9462	45.574	0.00216027	0.452837	-0.148861	148.266	31.4275	16.8572	0.332894	0.561613	0.00494825	Protein required for DNA repair; component of the Mre11 complex, which is involved in double strand breaks, meiotic recombination, telomere maintenance, and checkpoint signaling
YDR370C		277.932	29.7889	1.05277	262.386	21.2282	15.546	0.245517	0.993887	-0.00308947	197.729	14.8936	80.2033	5.40801e-06	0.748974	-0.263795	226.689	51.1025	51.2435	0.0597614	0.85867	-0.078299	Uncharacterized
YDR371W	CTS2	281.96	23.3155	1.06803	266.786	29.0034	15.1734	0.305297	1.01055	-0.000869543	190.391	15.2107	91.5688	1.98525e-07	0.721177	-0.306266	241.196	42.7648	40.7637	0.0695329	0.913621	-0.0369249	Protein similar to Ashbya gossypii sporulation-specific chitinase
YDR372C	VPS74	299.149	26.5724	1.13314	290.193	31.837	8.95638	0.576747	1.09921	0.0261308	231.468	21.7368	67.681	0.000112674	0.876773	-0.213308	225.437	27.9404	73.7124	0.000371629	0.853927	-0.154568	Protein required for Golgi localization of glycosyltransferases; binds the cytosolic domains of Golgi glycosyltransferases; functions as a heterotetramer
YDR374C		283.891	9.4446	1.07534	273.449	21.9281	10.442	0.311716	1.03579	0.0174402	221.489	27.5172	62.4014	0.00194962	0.838975	-0.195506	236.531	34.1269	47.3602	0.0182343	0.895949	-0.0611068	Uncharacterized
YDR375C	BCS1	283.67	45.0072	1.07451	215.29	51.8627	68.3803	0.0273916	0.815492	-0.202067	187.165	24.1621	96.5049	0.000305547	0.708959	-0.324717	237.89	60.2404	45.7802	0.152729	0.901098	-0.0552138	Protein of the mitochondrial inner membrane that functions as an ATP-dependent chaperone, required for the incorporation of the Rip1p and Qcr10p subunits into the cytochrome bc(1) complex; member of the CDC48/PAS1/SEC18 ATPase family
YDR379W	RGA2	284.93	15.0561	1.07928	237.716	26.4319	47.2137	0.0051307	0.90044	-0.121638	205.397	25.6946	79.5332	0.0002006	0.778018	-0.26025	225.634	56.2351	59.2964	0.0487852	0.854672	-0.105887	GTPase-activating protein for the polarity-establishment protein Cdc42p; implicated in control of septin organization, pheromone response, and haploid invasive growth; regulated by Pho85p and Cdc28p
YDR380W	ARO10	290.367	36.5809	1.09987	249.671	74.7718	40.6953	0.257817	0.945725	-0.0958555	222.703	29.8635	67.6641	0.00192767	0.843571	-0.214508	258.034	70.1803	32.3331	0.334421	0.9774	-0.00148771	Phenylpyruvate decarboxylase, catalyzes decarboxylation of phenylpyruvate to phenylacetaldehyde, which is the first specific step in the Ehrlich pathway
YDR384C	ATO3	273.828	28.7159	1.03723	280.786	33.9848	-6.95818	0.684328	1.06358	0.0813298	214.805	20.2997	59.0234	0.000315282	0.813654	-0.184159	220.358	47.1233	53.4698	0.0389659	0.83469	-0.0884422	Plasma membrane protein, regulation pattern suggests a possible role in export of ammonia from the cell; phosphorylated in mitochondria; member of the TC 9.B.33 YaaH family of putative transporters
YDR385W	EFT2	218.253	32.0069	0.826716	220.518	32.6726	-2.26498	0.894959	0.835295	0.0523954	160.926	23.4713	57.3268	0.00118039	0.609569	-0.185732	212.483	42.2733	5.77003	0.77997	0.80486	0.0690826	Elongation factor 2 (EF-2), also encoded by EFT1; catalyzes ribosomal translocation during protein synthesis; contains diphthamide, the unique posttranslationally modified histidine residue specifically ADP-ribosylated by diphtheria toxin
YDR386W	MUS81	247.825	24.8414	0.938732	247.644	27.5182	0.181608	0.989696	0.938044	0.0490649	189.856	5.84683	57.9688	2.57963e-05	0.719153	-0.183907	194.829	23.4566	52.9961	0.0012547	0.737989	-0.0974825	Subunit of the structure-specific Mms4p-Mus81p endonuclease that cleaves branched DNA; involved in DNA repair, replication fork stability, and joint molecule formation/resolution during meiotic recombination; helix-hairpin-helix protein
YDR387C		288.498	28.4103	1.09279	286.378	46.0079	2.11989	0.92163	1.08476	0.0498882	227.145	23.9204	61.3526	0.000562739	0.860398	-0.19087	234.635	26.2955	53.8622	0.00255735	0.88877	-0.0838163	Uncharacterized
YDR391C		274.39	36.8254	1.03935	268.234	23.5295	6.15582	0.689661	1.01604	0.0317683	223.927	25.7739	50.4622	0.00648575	0.84821	-0.151649	232.267	27.9461	42.1225	0.0226886	0.8798	-0.045226	Uncharacterized
YDR395W	SXM1	269.181	35.9675	1.01962	271.114	27.5237	-1.93379	0.905587	1.02695	0.061365	217.868	28.8645	51.313	0.00820402	0.825256	-0.155622	248.611	74.6414	20.57	0.548957	0.941707	0.0342421	Nuclear transport factor (karyopherin) involved in protein transport between the cytoplasm and nucleoplasm; similar to Nmd5p, Cse1p, Lph2p, and the human cellular apoptosis susceptibility protein, CAS1
YDR399W	HPT1	275.972	40.8981	1.04535	263.894	42.0467	12.0779	0.586025	0.999598	0.00965399	220.618	24.7197	55.3541	0.00455017	0.835673	-0.169951	218.539	39.4143	57.4332	0.0178419	0.827797	-0.102562	Dimeric hypoxanthine-guanine phosphoribosyltransferase, catalyzes the formation of both inosine monophosphate and guanosine monophosphate; mutations in the human homolog HPRT1 can cause Lesch-Nyhan syndrome and Kelley-Seegmiller syndrome
YDR402C	DIT2	269.011	27.4504	1.01898	274.565	35.353	-5.55422	0.749417	1.04002	0.0750447	225.368	16.7388	43.6428	0.00145799	0.853667	-0.126592	211.731	40.5174	57.2799	0.0159008	0.802011	-0.104882	N-formyltyrosine oxidase, sporulation-specific microsomal enzyme involved in the production of N,N-bisformyl dityrosine required for spore wall maturation, homologous to cytochrome P-450s
YDR446W	ECM11	286.054	21.8816	1.08354	213.598	37.1842	72.4562	0.00319521	0.809083	-0.217028	270.644	24.4839	15.4104	0.241444	1.02517	-0.0171983	249.262	23.4931	36.7918	0.0117877	0.944175	-0.0201737	Non-essential protein apparently involved in meiosis, GFP fusion protein is present in discrete clusters in the nucleus throughout mitosis; may be involved in maintaining chromatin structure
YDR483W	KRE2	254.115	24.4916	0.962558	153.936	81.2698	100.179	0.0283714	0.583093	-0.32845	243.466	34.1727	10.649	0.52767	0.922221	-0.00376008	135.13	10.7706	118.985	2.91627e-08	0.511858	-0.344819	Alpha1,2-mannosyltransferase of the Golgi involved in protein mannosylation
YDR500C	RPL37B	167.261	36.3799	0.633564	183.016	25.7202	-15.755	0.32963	0.693242	0.093257	186.9	29.4036	-19.6389	0.259469	0.707953	0.0984651	214.225	11.4753	-46.9638	0.00275342	0.811457	0.247585	Protein component of the large (60S) ribosomal subunit, has similarity to Rpl37Ap and to rat L37 ribosomal protein
YDR501W	PLM2	286.396	13.0343	1.08483	255.876	27.1779	30.5199	0.0396422	0.969229	-0.0581094	270.387	34.2787	16.0089	0.316679	1.02419	-0.0194162	218.657	38.2175	67.7391	0.00628454	0.828247	-0.137256	Forkhead Associated domain containing protein and putative transcription factor found associated with chromatin; target of SBF transcription factor; induced in response to DNA damaging agents and deletion of telomerase; similar to TOS4
YDR506C		256.7	40.9142	0.97235	200.082	28.5319	56.6186	0.00602266	0.757885	-0.16293	215.941	19.2818	40.7596	0.0179544	0.817958	-0.117443	210.774	12.8559	45.9262	0.00671799	0.798387	-0.0670042	Uncharacterized
YDR541C		291.197	38.8415	1.10302	337.73	16.983	-46.5333	0.00563592	1.27928	0.234723	294.835	12.9856	-3.6388	0.790276	1.1168	0.055698	253.754	18.6053	37.4426	0.0216559	0.961189	-0.0204963	Uncharacterized
YER019C-A	SBH2	185.582	33.5284	0.702964	269.208	37.7125	-83.626	0.00129755	1.01973	0.354022	252.253	25.7037	-66.671	0.000639772	0.955505	0.279254	241.314	34.4494	-55.7318	0.00959376	0.914069	0.288431	Ssh1p-Sss1p-Sbh2p complex component, involved in protein translocation into the endoplasmic reticulum; homologous to Sbh1p
YER019W	ISC1	137.787	27.0268	0.521921	200.877	35.8166	-63.0897	0.00540091	0.760898	0.266638	225.158	43.2747	-87.3705	0.00255615	0.85287	0.350782	282.913	41.3817	-145.126	7.09555e-05	1.07164	0.60713	Mitochondrial membrane localized inositol phosphosphingolipid phospholipase C, hydrolyzes complex sphingolipids to produce ceramide; activated by phosphatidylserine, cardiolipin, and phosphatidylglycerol; mediates Na+ and Li+ halotolerance
YER024W	YAT2	213.203	45.7386	0.807588	289.306	42.8941	-76.1024	0.00628551	1.09585	0.331069	273.986	39.5434	-60.7826	0.0159566	1.03783	0.260926	235.762	26.087	-22.5587	0.2297	0.893038	0.174284	Carnitine acetyltransferase; has similarity to Yat1p, which is a carnitine acetyltransferase associated with the mitochondrial outer membrane
YER033C	ZRG8	268.408	36.7201	1.0167	362.122	49.0387	-93.714	0.00333068	1.37168	0.408862	314.493	18.436	-46.0848	0.0050516	1.19126	0.213198	298.483	35.8073	-30.0746	0.135768	1.13062	0.225756	Protein of unknown function; authentic, non-tagged protein is detected in highly purified mitochondria in high-throughput studies; GFP-fusion protein is localized to the cytoplasm; transcription induced under conditions of zinc deficiency
YER056C	FCY2	248.444	26.4937	0.941076	224.767	33.2958	23.677	0.17297	0.85139	-0.0398086	291.758	24.1881	-43.3144	0.00617889	1.10515	0.19983	287.018	41.3804	-38.5742	0.0773128	1.08719	0.249633	Purine-cytosine permease, mediates purine (adenine, guanine, and hypoxanthine) and cytosine accumulation
YER056C-A	RPL34A	243.719	33.729	0.923178	273.324	24.7814	-29.6051	0.0648462	1.03532	0.161069	308.214	19.4468	-64.4946	0.00025701	1.16748	0.279378	298.778	45.2829	-55.0585	0.0314673	1.13173	0.310105	Protein component of the large (60S) ribosomal subunit, nearly identical to Rpl34Bp and has similarity to rat L34 ribosomal protein
YER060W-A	FCY22	277.162	28.706	1.04986	192.425	59.1178	84.7376	0.0150045	0.728882	-0.265333	232.179	21.6837	44.9832	0.00444578	0.879467	-0.130496	260.6	19.5781	16.5621	0.206959	0.987122	0.052749	Putative purine-cytosine permease, very similar to Fcy2p but cannot substitute for its function
YER061C	CEM1	176.215	43.088	0.667482	184.207	11.72	-7.99219	0.590989	0.697755	0.06565	220.982	37.9738	-44.7664	0.0512631	0.837051	0.194934	276.514	52.0187	-100.299	0.00315481	1.0474	0.453343	Mitochondrial beta-keto-acyl synthase with possible role in fatty acid synthesis; required for mitochondrial respiration
YER074W	RPS24A	111.435	18.4844	0.422103	100.094	21.8617	11.3407	0.321462	0.379146	-0.0205857	121.757	18.8906	-10.3217	0.318782	0.4612	0.0551371	176.015	38.1128	-64.5801	0.00698683	0.666724	0.291053	Protein component of the small (40S) ribosomal subunit; identical to Rps24Bp and has similarity to rat S24 ribosomal protein
YER092W	IES5	177.034	53.67	0.670582	235.666	41.3891	-58.6323	0.0294529	0.892674	0.257633	240.853	11.8653	-63.8191	0.00443232	0.912321	0.267221	306.67	51.7096	-129.637	0.000566027	1.16163	0.564812	Protein that associates with the INO80 chromatin remodeling complex under low-salt conditions
YER111C	SWI4	248.712	35.4923	0.942091	242.255	14.8753	6.45725	0.621306	0.917632	0.0254716	238.102	13.5582	10.6099	0.421054	0.901902	-0.00438943	316.897	32.9662	-68.1854	0.00238264	1.20037	0.361908	DNA binding component of the SBF complex (Swi4p-Swi6p), a transcriptional activator that in concert with MBF (Mbp1-Swi6p) regulates late G1-specific transcription of targets including cyclins and genes required for DNA synthesis and repair
YER120W	SCS2	269.149	27.6669	1.0195	226.353	26.4578	42.796	0.0115591	0.857397	-0.108073	234.283	20.327	34.8662	0.0149332	0.887434	-0.0933277	189.559	34.7347	79.5898	0.00107724	0.718026	-0.189331	Integral ER membrane protein that regulates phospholipid metabolism via an interaction with the FFAT motif of Opi1p, also involved in telomeric silencing, disruption causes inositol auxotrophy above 34 degrees C, VAP homolog
YER139C		238.102	34.8238	0.901903	241.534	29.5987	-3.43202	0.837216	0.914903	0.0608009	237.762	28.7448	0.340671	0.983449	0.900613	0.0329819	172.702	15.7376	65.4002	0.000176629	0.654175	-0.148519	Protein with a role in transcription; interacts with Rpo21p; has a cysteine-rich motif required for function and conserved in eukaryotes; shuttles between the nucleus and cytoplasm; RTR1 shows genetic interactions with RPB4, 5, 7, and 9
YER140W		269.937	29.8669	1.02249	292.632	26.9918	-22.6952	0.144784	1.10845	0.140159	264.639	22.5591	5.29757	0.694497	1.00242	0.018788	204.298	26.7701	65.6391	0.000725212	0.773855	-0.136159	Uncharacterized
YER144C	UBP5	310.356	30.118	1.17559	250.364	22.9455	59.9917	0.000808689	0.948349	-0.164935	324.891	57.9323	-14.5353	0.589686	1.23065	0.0997303	287.167	50.597	23.1887	0.34459	1.08775	0.041479	Putative ubiquitin-specific protease, closest paralog of Doa4p but has no functional overlap; concentrates at the bud neck
YER145C	FTR1	310.454	21.4413	1.17596	254.777	34.9595	55.677	0.00904903	0.965064	-0.148572	311.099	35.4543	-0.645086	0.969172	1.17841	0.0471301	282.128	22.8054	28.3262	0.0356444	1.06867	0.0220595	High affinity iron permease involved in the transport of iron across the plasma membrane; forms complex with Fet3p; expression is regulated by iron
YER151C	UBP3	172.093	30.752	0.651868	58.7728	11.0125	113.32	1.61381e-07	0.222624	-0.394695	198.265	31.3275	-26.1716	0.13292	0.751002	0.123906	123.268	61.7836	48.8254	0.117001	0.466923	-0.113239	Ubiquitin-specific protease that interacts with Bre5p to co-regulate anterograde and retrograde transport between endoplasmic reticulum and Golgi compartments; inhibitor of gene silencing; cleaves ubiquitin fusions but not polyubiquitin
YER153C	PET122	282.668	42.389	1.07071	223.603	18.9217	59.0652	0.00552495	0.846982	-0.166984	286.693	38.3984	-4.02462	0.856019	1.08596	0.0559319	283.043	59.6066	-0.374528	0.989842	1.07213	0.119197	Mitochondrial translational activator specific for the COX3 mRNA, acts together with Pet54p and Pet494p; located in the mitochondrial inner membrane
YER155C	BEM2	233.428	23.6862	0.884197	266.583	25.5289	-33.1552	0.0272322	1.00979	0.17245	270.725	20.9173	-37.2971	0.00668887	1.02547	0.174876	351.356	57.4657	-117.928	0.00298674	1.33089	0.543958	Rho GTPase activating protein (RhoGAP) involved in the control of cytoskeleton organization and cellular morphogenesis; required for bud emergence
YER161C	SPT2	267.491	24.381	1.01322	271.008	27.2838	-3.51721	0.80057	1.02655	0.0670236	281.59	24.2052	-14.0984	0.285184	1.06663	0.0919056	341.258	18.9171	-73.7667	1.42717e-05	1.29264	0.390874	Protein involved in negative regulation of transcription; required for RNA polyadenylation; exhibits regulated interactions with both histones and SWI-SNF components, has similarity to mammalian HMG1 proteins
YER163C		286.155	19.6124	1.08392	226.998	23.4528	59.1574	0.000539852	0.85984	-0.166633	274.874	44.8374	11.2812	0.580123	1.04119	-0.00154265	259.286	31.4034	26.869	0.0989612	0.982145	0.0174547	Uncharacterized
YER170W	ADK2	272.482	27.0313	1.03213	222.431	13.8524	50.0513	0.000250147	0.842541	-0.134886	242.966	25.3503	29.5163	0.0496729	0.920325	-0.0725831	242.514	24.62	29.9684	0.0432218	0.918612	1.75294e-05	Mitochondrial adenylate kinase, catalyzes the reversible synthesis of GTP and AMP from GDP and ADP; may serve as a back-up for synthesizing GTP or ADP depending on metabolic conditions; 3' sequence of ADK2 varies with strain background
YER178W	PDA1	187.758	40.6644	0.711205	191.135	23.9557	-3.37654	0.837459	0.723994	0.0504838	229.982	26.6712	-42.2242	0.0254074	0.871145	0.186966	253.02	37.5422	-65.2618	0.00725639	0.958408	0.325436	E1 alpha subunit of the pyruvate dehydrogenase (PDH) complex, catalyzes the direct oxidative decarboxylation of pyruvate to acetyl-CoA; phosphorylated; regulated by glucose
YER179W	DMC1	273.235	23.9618	1.03498	225.225	16.7079	48.0106	0.000368017	0.853124	-0.127004	243.289	19.3109	29.9459	0.0173583	0.92155	-0.0741022	239.778	22.392	33.4568	0.0163784	0.908252	-0.0128823	Meiosis-specific protein required for repair of double-strand breaks and pairing between homologous chromosomes; homolog of Rad51p and the bacterial RecA protein
YER185W		269.828	19.7443	1.02208	220.639	24.6378	49.189	0.00261572	0.835756	-0.132152	254.033	24.5448	15.795	0.219608	0.962248	-0.0209907	210.736	34.2594	59.0923	0.00611918	0.798243	-0.111406	Plasma membrane protein with roles in the uptake of protoprophyrin IX and the efflux of heme; expression is induced under both low-heme and low-oxygen conditions; member of the fungal lipid-translocating exporter (LTE) family of proteins
YFL013C	IES1	198.47	35.8003	0.751782	275.823	36.0823	-77.3522	0.00171079	1.04478	0.332845	273.154	34.0657	-74.6834	0.00154336	1.03467	0.311459	346.009	94.6998	-147.539	0.010964	1.31064	0.641556	Subunit of the INO80 chromatin remodeling complex
YFL031W	HAC1	248.261	54.5879	0.940383	186.642	26.5414	61.6195	0.00932756	0.706976	-0.183567	253.27	52.7309	-5.00903	0.859262	0.959357	0.0547082	216.982	91.231	31.2797	0.470312	0.8219	-0.0150415	Basic leucine zipper (bZIP) transcription factor (ATF/CREB1 homolog) that regulates the unfolded protein response, via UPRE binding, and membrane biogenesis; ER stress-induced splicing pathway facilitates efficient Hac1p synthesis
YFL036W	RPO41	97.3979	33.5078	0.368931	105.854	34.0517	-8.45585	0.638464	0.400961	0.0515831	138.229	38.0044	-40.8309	0.0559923	0.523594	0.168682	184.174	48.3734	-86.7761	0.00481071	0.697629	0.36928	Mitochondrial RNA polymerase; single subunit enzyme similar to those of T3 and T7 bacteriophages; requires a specificity subunit encoded by MTF1 for promoter recognition
YFL049W		254.154	45.5854	0.962704	186.528	13.9284	67.626	0.0010141	0.706545	-0.205136	212.6	9.70656	41.5543	0.0189565	0.805302	-0.12082	205.936	29.9332	48.2183	0.0232753	0.780059	-0.0767474	Member of the SWI/SNF chromatin remodeling complex in which it plays an as yet unidentified role; has identifiable counterparts in closely related yeast species; abundantly expressed in many growth conditions; paralog of Npl6p
YFR010W	UBP6	147.322	24.3105	0.558039	156.768	30.3841	-9.44534	0.5339	0.593817	0.0653539	154.685	22.8363	-7.36288	0.55444	0.585929	0.0490952	268.88	42.7568	-121.557	0.000380838	1.01848	0.521829	Ubiquitin-specific protease situated in the base subcomplex of the 26S proteasome, releases free ubiquitin from branched polyubiquitin chains; works in opposition to polyubiquitin elongation activity of Hul5p
YFR018C		301.865	13.792	1.14343	288.594	43.0947	13.2707	0.49445	1.09316	0.0103339	292.594	31.4487	9.27138	0.520781	1.10831	0.00833144	232.903	11.0937	68.9626	1.29704e-07	0.882207	-0.135445	Uncharacterized
YFR019W	FAB1	277.602	15.7359	1.05152	230.594	23.6832	47.0078	0.00275371	0.873462	-0.122329	243.91	55.4409	33.6915	0.201163	0.923902	-0.0876615	273.293	14.5984	4.30912	0.5977	1.0352	0.0993449	1-phosphatidylinositol-3-phosphate 5-kinase; vacuolar membrane kinase that generates phosphatidylinositol (3,5)P2, which is involved in vacuolar sorting and homeostasis
YFR039C		259.851	47.407	0.984285	203.069	24.9915	56.7819	0.0074152	0.769202	-0.162916	239.034	31.2932	20.8178	0.308752	0.90543	-0.0414523	202.825	26.1482	57.0265	0.00786825	0.768276	-0.107738	Uncharacterized
YFR041C	ERJ5	265.159	31.4551	1.00439	274.77	33.0588	-9.61074	0.585716	1.04079	0.089637	254.948	30.945	10.2111	0.54664	0.965711	-0.000511758	201.417	38.8956	63.742	0.00824776	0.762942	-0.130964	Type I membrane protein with a J domain is required to preserve the folding capacity of the endoplasmic reticulum; loss of the non-essential ERJ5 gene leads to a constitutively induced unfolded protein response
YFR043C		267.908	23.9918	1.0148	283.449	35.9548	-15.5408	0.379819	1.07367	0.112651	288.636	14.5654	-20.7272	0.0579605	1.09332	0.117075	192.652	26.0498	75.2561	0.000194875	0.729743	-0.173432	Putative protein of unknown function; null mutant displays increased levels of spontaneous Rad52p foci
YFR055W		279.109	33.9479	1.05723	293.754	34.0863	-14.6445	0.423036	1.1127	0.111505	276.413	12.8284	2.69599	0.825072	1.04702	0.0299627	215.368	31.6212	63.7411	0.00282394	0.815789	-0.125148	Putative cystathionine beta-lyase; involved in copper ion homeostasis and sulfur metabolism; null mutant displays increased levels of spontaneous Rad52p foci; expression induced by nitrogen limitation in a GLN3, GAT1-dependent manner
YGL017W	ATE1	263.043	30.9427	0.996374	276.412	31.5696	-13.3689	0.427102	1.04701	0.103448	272.143	31.6819	-9.09987	0.586561	1.03084	0.0723314	200.08	26.9691	62.963	0.00110064	0.757878	-0.128895	Arginyl-tRNA-protein transferase, catalyzes post-translational conjugation of arginine to the amino termini of acceptor proteins which are then subject to degradation via the N-end rule pathway
YGL027C	CWH41	268.255	47.5387	1.01612	221.82	32.9726	46.4353	0.0378378	0.840226	-0.122037	240.979	12.585	27.2761	0.114094	0.912798	-0.0647063	200.35	22.6862	67.9051	0.0018721	0.7589	-0.145444	Processing alpha glucosidase I, ER type II integral membrane N-glycoprotein involved in assembly of cell wall beta 1,6 glucan and asparagine-linked protein glycosylation; also involved in ER protein quality control and sensing of ER stress
YGL046W	YGL046W	171.61	29.8665	0.650039	171.192	10.8904	0.41835	0.968673	0.648455	0.0328674	226.873	21.1353	-55.263	0.000772518	0.859369	0.234031	175.234	31.6303	-3.62401	0.825285	0.663767	0.0852316	Merged with RIM8, Protein of unknown function, involved in the proteolytic activation of Rim101p in response to alkaline pH; has similarity to A. nidulans PalF; essential for anaerobic growth
YGL060W	YBP2	296.872	13.9912	1.12452	232.247	35.6163	64.625	0.0054023	0.879724	-0.185192	288.222	33.5772	8.64981	0.5715	1.09175	0.00996714	278.256	13.6639	18.6165	0.0264075	1.054	0.0531797	Central kinetochore associated protein that mediates mitotic progression; interacts with several central kinetochore proteins and the centromeric histone Cse4p; role in resistance to oxidative stress; similarity to Ybp1p and Slk19p
YGL062W	PYC1	299.511	33.1274	1.13451	247.623	18.754	51.8875	0.00131971	0.937968	-0.136415	268.602	30.3013	30.9086	0.0819133	1.01743	-0.0739666	229.662	25.3978	69.8489	0.000392633	0.869932	-0.139783	Pyruvate carboxylase isoform, cytoplasmic enzyme that converts pyruvate to oxaloacetate; highly similar to isoform Pyc2p but differentially regulated; mutations in the human homolog are associated with lactic acidosis
YGL063W	PUS2	333.424	59.2899	1.26297	253.364	47.1188	80.0603	0.0108979	0.959712	-0.236321	278.786	30.8296	54.6381	0.0298789	1.05601	-0.15897	203.216	56.5013	130.208	0.00107568	0.769757	-0.354287	Mitochondrial tRNA:pseudouridine synthase; acts at positions 27 and 28, but not at position 72; efficiently and rapidly targeted to mitochondria, specifically dedicated to mitochondrial tRNA modification
YGL066W	SGF73	147.37	33.1896	0.558218	101.851	19.3378	45.519	0.00529097	0.385798	-0.142835	149.201	20.7353	-1.8311	0.897436	0.565154	0.0281483	110.191	15.1353	37.1787	0.0125953	0.417389	-0.0794246	Subunit of SAGA histone acetyltransferase complex; involved in formation of the preinitiation complex assembly at promoters; null mutant displays defects in premeiotic DNA synthesis
YGL067W	NPY1	286.37	22.0081	1.08474	228.223	34.6679	58.147	0.00694874	0.864482	-0.162763	290.645	34.3576	-4.27438	0.79222	1.10093	0.0574108	194.451	30.4596	91.9193	0.000180217	0.736556	-0.228858	NADH diphosphatase (pyrophosphatase), hydrolyzes the pyrophosphate linkage in NADH and related nucleotides; localizes to peroxisomes
YGL071W	RCS1	347.303	56.7151	1.31554	273.32	46.2743	73.9825	0.0144273	1.0353	-0.210513	303.699	46.1284	43.6041	0.118451	1.15037	-0.115177	243.066	40.1083	104.236	0.000813606	0.920706	-0.250125	Transcription factor involved in iron utilization and homeostasis; binds the consensus site PyPuCACCCPu and activates the expression of target genes in response to changes in iron availability
YGL077C	HNM1	301.662	40.065	1.14266	205.626	19.4515	96.036	1.78728e-05	0.778887	-0.303212	265.579	30.0986	36.0828	0.0615964	1.00598	-0.0932563	208.07	24.6695	93.5916	4.81918e-05	0.788146	-0.228821	Choline/ethanolamine transporter; involved in the uptake of nitrogen mustard and the uptake of glycine betaine during hypersaline stress; co-regulated with phospholipid biosynthetic genes and negatively regulated by choline and myo-inositol
YGL078C	DBP3	195.587	48.6104	0.740858	108.332	35.5606	87.2546	0.00114758	0.410349	-0.291244	154.791	14.0183	40.7954	0.0297125	0.58633	-0.126376	152.181	21.3432	43.4057	0.0285495	0.576443	-0.082921	Putative ATP-dependent RNA helicase of the DEAD-box family involved in ribosomal biogenesis
YGL079W		282.535	29.523	1.07021	220.251	14.2908	62.2842	0.000140578	0.834283	-0.179204	285.806	31.7648	-3.27068	0.844685	1.0826	0.0530568	186.733	14.3992	95.8017	2.09934e-06	0.707322	-0.245163	Uncharacterized
YGL080W	FMP37	277.151	24.8727	1.04982	229.003	20.8514	48.1489	0.00128444	0.867434	-0.126742	273.795	31.6306	3.35608	0.829447	1.0371	0.0271806	180.007	19.4148	97.1445	9.88649e-07	0.681845	-0.252492	Putative protein of unknown function; highly conserved across species and orthologous to human gene BRP44L; the authentic, non-tagged protein is detected in highly purified mitochondria in high-throughput studies
YGL081W		250.316	29.8746	0.948166	230.024	27.2081	20.2917	0.199633	0.871304	-0.0266098	264.502	19.7322	-14.186	0.288141	1.0019	0.0897653	188.789	24.369	61.527	0.000857849	0.715109	-0.128759	Uncharacterized
YGL082W		284.99	18.9843	1.07951	218.094	33.7689	66.8961	0.00304171	0.826115	-0.19618	272.808	31.6262	12.182	0.419773	1.03337	-0.00512263	199.643	15.2188	85.3471	2.71655e-07	0.756225	-0.204538	Uncharacterized
YGL083W	SCY1	274.502	21.9948	1.03978	209.005	27.3391	65.497	0.000786865	0.791685	-0.192986	285.08	25.3722	-10.5784	0.417461	1.07985	0.0795815	221.022	26.7601	53.48	0.00253215	0.837204	-0.0881999	Putative kinase, suppressor of GTPase mutant, similar to bovine rhodopsin kinase
YGL084C	GUP1	252.719	28.1422	0.95727	149.603	26.5511	103.116	1.3126e-05	0.566679	-0.339855	232.567	31.4484	20.1527	0.226896	0.880934	-0.0399596	208.284	39.1255	44.4348	0.040656	0.788956	-0.0630139	Plasma membrane protein involved in remodeling GPI anchors; member of the MBOAT family of putative membrane-bound O-acyltransferases; proposed to be involved in glycerol transport
YGL085W		262.957	18.1767	0.99605	156.977	26.7661	105.981	2.71166e-05	0.594609	-0.348651	231.194	24.9456	31.7628	0.0264583	0.875737	-0.0824637	156.39	18.1148	106.567	2.69696e-07	0.592386	-0.294099	Putative protein of unknown function, has homology to Staphylococcus aureus nuclease; green fluorescent protein (GFP)-fusion protein localizes to mitochondria and is induced in response to the DNA-damaging agent MMS
YGL086W	MAD1	274.145	34.0178	1.03843	184.206	38.3732	89.9392	0.000886577	0.697751	-0.285642	270.45	45.8864	3.69513	0.868259	1.02443	0.0254636	183.782	36.0439	90.3631	0.000545653	0.696145	-0.228057	Coiled-coil protein involved in the spindle-assembly checkpoint; phosphorylated by Mps1p upon checkpoint activation which leads to inhibition of the activity of the anaphase promoting complex; forms a complex with Mad2p
YGL087C	MMS2	297.324	23.9481	1.12623	199.984	31.1416	97.3401	0.000126754	0.757517	-0.309022	301.249	47.5055	-3.92476	0.85618	1.1411	0.0576632	172.547	40.9472	124.777	0.000238303	0.653587	-0.348757	Ubiquitin-conjugating enzyme variant involved in error-free postreplication repair; forms a heteromeric complex with Ubc13p, an active ubiquitin-conjugating enzyme; cooperates with chromatin-associated RING finger proteins, Rad18p and Rad5p
YGL090W	LIF1	272.575	34.1171	1.03248	199.552	36.56	73.0226	0.00263175	0.75588	-0.221879	291.214	31.7588	-18.6391	0.292091	1.10308	0.109837	160.001	41.226	112.574	0.000308567	0.606065	-0.312843	Component of the DNA ligase IV complex that mediates nonhomologous end joining in DNA double-strand break repair; physically interacts with Dnl4p and Nej1p; homologous to mammalian XRCC4 protein
YGL094C	PAN2	290.297	34.431	1.09961	226.048	62.3357	64.2487	0.0539863	0.856242	-0.185087	282.745	28.5967	7.55171	0.644457	1.071	0.0131802	182.461	42.9695	107.835	0.0005748	0.691141	-0.287511	Essential subunit of the Pan2p-Pan3p poly(A)-ribonuclease complex, which acts to control poly(A) tail length and regulate the stoichiometry and activity of postreplication repair complexes
YGL153W	PEX14	230.207	66.3459	0.871997	159.839	21.1341	70.368	0.00941121	0.605452	-0.22033	232.889	15.6809	-2.68175	0.904985	0.882155	0.043294	136.061	27.0209	94.1464	0.00161991	0.515382	-0.260695	Peroxisomal membrane peroxin that is a central component of the peroxisomal protein import machinery; interacts with both PTS1 (Pex5p) and PTS2 (Pex7p), peroxisomal matrix protein signal recognition factors and membrane receptor Pex13p
YGL156W	AMS1	236.453	30.0172	0.895654	202.677	47.5272	33.7759	0.15933	0.767715	-0.0804695	267.461	45.5075	-31.0087	0.177145	1.01311	0.151492	129.249	19.0672	107.204	5.19748e-07	0.489579	-0.307554	Vacuolar alpha mannosidase, involved in free oligosaccharide (fOS) degradation; delivered to the vacuole in a novel pathway separate from the secretory pathway
YGL157W	ARI1	237.005	47.5796	0.897746	174.478	33.8588	62.5268	0.00884033	0.660902	-0.189263	268.899	18.8964	-31.8941	0.0822098	1.01856	0.154925	113.665	12.5431	123.34	8.99604e-06	0.430548	-0.368446	Aldehyde reductase; Oxidoreductase, catalyzes NADPH-dependent reduction of the bicyclic diketone bicyclo[2.2.2]octane-2,6-dione (BCO2,6D) to the chiral ketoalcohol (1R,4S,6S)-6-hydroxybicyclo[2.2.2]octane-2-one (BCO2one6ol)
YGL158W	RCK1	274.246	38.5144	1.03881	205.116	22.3546	69.13	0.000460449	0.776953	-0.206799	277.72	36.2358	-3.4747	0.859341	1.05197	0.0526365	140.869	50.5932	133.376	0.000428392	0.533596	-0.390944	Protein kinase involved in the response to oxidative stress; identified as suppressor of S. pombe cell cycle checkpoint mutations
YGL159W		240.831	20.8324	0.912239	189.884	28.2361	50.9472	0.00462662	0.719257	-0.144633	246.642	22.6346	-5.81143	0.619764	0.934252	0.0566781	149.61	41.3364	91.2206	0.00182702	0.566706	-0.245186	Uncharacterized
YGL160W		253.769	22.62	0.961248	196.171	28.6768	57.5981	0.00246007	0.743074	-0.167228	237.496	17.3089	16.2737	0.12965	0.899605	-0.0251154	122.368	21.1656	131.402	1.185e-07	0.463514	-0.391997	Putative protein of with similarity to iron/copper reductases (FRE1-8), possibly involved in iron homeostasis; may interact with ribosomes; null mutant displays elevated frequency of mitochondrial genome loss
YGL161C	YIP5	257.463	29.3882	0.975239	191.985	35.8762	65.4778	0.00436299	0.727217	-0.196334	248.68	21.2514	8.78272	0.501549	0.941971	0.00379121	173.091	12.06	84.3725	2.24924e-06	0.655646	-0.212317	Protein that interacts with Rab GTPases, localized to late Golgi vesicles; computational analysis of large-scale protein-protein interaction data suggests a possible role in vesicle-mediated transport
YGL162W	SUT1	248.856	35.8282	0.942636	170.64	26.6244	78.2158	0.000242706	0.646364	-0.246312	269.784	25.2851	-20.9282	0.194512	1.02191	0.115094	192.904	35.2456	55.9522	0.0111502	0.730696	-0.10825	Transcription factor of the Zn[II]2Cys6 family involved in sterol uptake; involved in induction of hypoxic gene expression
YGL163C	RAD54	202.158	50.5725	0.76575	137.087	30.0121	65.071	0.00605457	0.519269	-0.205896	195.086	31.8453	7.07147	0.736652	0.738964	0.0023126	159.469	26.4529	42.6885	0.0442351	0.604051	-0.0774663	DNA-dependent ATPase, stimulates strand exchange by modifying the topology of double-stranded DNA; involved in the recombinational repair of double-strand breaks in DNA during vegetative growth and meiosis; member of the SWI/SNF family
YGL164C	YRB30	267.811	37.1893	1.01443	226.606	42.1392	41.2045	0.0774092	0.858357	-0.102313	267.492	34.1718	0.319178	0.986345	1.01323	0.0373395	159.951	23.0803	107.86	5.01632e-06	0.605875	-0.296972	RanGTP-binding protein, inhibits RanGAP1 (Rna1p)-mediated GTP hydrolysis of RanGTP (Gsp1p); shares similarity to proteins in other fungi but not in higher eukaryotes
YGL166W	CUP2	275.718	50.4811	1.04439	224.913	28.8708	50.8051	0.0226602	0.851943	-0.137091	301.696	29.5361	-25.9774	0.215102	1.14279	0.138086	182.034	51.3167	93.6838	0.00481429	0.689524	-0.23998	Copper-binding transcription factor; activates transcription of the metallothionein genes CUP1-1 and CUP1-2 in response to elevated copper concentrations
YGL170C	SPO74	265.89	19.9679	1.00716	227.068	26.1499	38.8224	0.0133459	0.860105	-0.093675	267.062	33.8928	-1.17143	0.941225	1.0116	0.0427093	178.834	25.8612	87.0558	6.92042e-05	0.677403	-0.218969	Component of the meiotic outer plaque of the spindle pole body, involved in modifying the meiotic outer plaque that is required prior to prospore membrane formation
YGL176C		288.62	29.8305	1.09326	211.198	20.6314	77.4221	4.98832e-05	0.799991	-0.235323	302.239	26.9144	-13.6196	0.37669	1.14485	0.0931331	266.531	42.2556	22.0883	0.298387	1.00959	0.0365904	Uncharacterized
YGL179C	TOS3	291.819	41.976	1.10538	262.692	47.6833	29.1273	0.245828	0.995045	-0.0517458	304.761	11.9637	-12.9419	0.379414	1.1544	0.0910265	224.352	27.2831	67.4668	0.00166133	0.849819	-0.133965	Protein kinase, related to and functionally redundant with Elm1p and Sak1p for the phosphorylation and activation of Snf1p; functionally orthologous to LKB1, a mammalian kinase associated with Peutz-Jeghers cancer-susceptibility syndrome
YGL195W	GCN1	238.21	22.4386	0.902311	249.908	45.4852	-11.6982	0.576109	0.946622	0.0921337	273.878	31.8031	-35.6682	0.042337	1.03742	0.169395	171.677	34.2209	66.5328	0.00313356	0.650292	-0.152764	Positive regulator of the Gcn2p kinase activity, forms a complex with Gcn20p; proposed to stimulate Gcn2p activation by an uncharged tRNA
YGL202W	ARO8	298.164	35.1946	1.12941	213.655	39.5219	84.5088	0.00165582	0.8093	-0.26025	244.791	33.9117	53.3732	0.0119802	0.927238	-0.159254	266.281	34.1824	31.8833	0.101805	1.00864	0.0034651	Aromatic aminotransferase I, expression is regulated by general control of amino acid biosynthesis
YGL208W	SIP2	287.214	30.4954	1.08793	206.118	40.6995	81.0958	0.00260455	0.780751	-0.249521	279.094	18.262	8.12013	0.516146	1.05717	0.0105833	251.221	42.9968	35.9932	0.109727	0.951594	-0.0166656	One of three beta subunits of the Snf1 serine/threonine protein kinase complex involved in the response to glucose starvation; null mutants exhibit accelerated aging; N-myristoylprotein localized to the cytoplasm and the plasma membrane
YGL209W	MIG2	283.144	24.8432	1.07251	223.811	17.0171	59.3327	0.000105345	0.847769	-0.167902	270.636	21.6262	12.5074	0.32201	1.02514	-0.00662101	264.955	48.4656	18.1884	0.425389	1.00362	0.0490813	Protein containing zinc fingers, involved in repression, along with Mig1p, of SUC2 (invertase) expression by high levels of glucose; binds to Mig1p-binding sites in SUC2 promoter
YGL210W	YPT32	281.846	23.7103	1.0676	202.56	42.0981	79.2857	0.00396626	0.767272	-0.243742	249.339	25.4066	32.5065	0.0292363	0.944466	-0.0825621	243.812	15.9471	38.0334	0.00190985	0.923531	-0.0266304	GTPase of the Ypt/Rab family, very similar to Ypt31p; involved in the exocytic pathway; mediates intra-Golgi traffic or the budding of post-Golgi vesicles from the trans-Golgi
YGL211W	NCS6	245.614	28.9322	0.930357	193.23	31.4679	52.3844	0.00834568	0.731931	-0.149117	222.935	19.7976	22.6789	0.0947907	0.844452	-0.0505513	250.213	28.8148	-4.599	0.768086	0.947777	0.11976	Protein required for thiolation of the uridine at the wobble position of Gln, Lys, and Glu tRNAs; has a role in urmylation and in invasive and pseudohyphal growth; inhibits replication of Brome mosaic virus in S. cerevisiae
YGL212W	VAM7	142.704	34.0537	0.540545	141.137	33.4492	1.56643	0.929874	0.534611	0.0227154	159.647	45.5642	-16.9428	0.452239	0.604722	0.0847178	204.817	26.8428	-62.1132	0.00145407	0.775822	0.294737	Component of the vacuole SNARE complex involved in vacuolar morphogenesis; SNAP-25 homolog; functions with a syntaxin homolog Vam3p in vacuolar protein trafficking
YGL216W	KIP3	256.166	37.6176	0.970325	191.463	22.3606	64.7032	0.000713708	0.725237	-0.193661	227.088	18.0858	29.0782	0.0572317	0.86018	-0.0732725	215.05	4.87	41.1154	0.00718047	0.814585	-0.0490044	Kinesin-related motor protein involved in mitotic spindle positioning
YGL219C	MDM34	128.148	53.5686	0.485407	146.674	8.5784	-18.5264	0.30995	0.555583	0.0959025	193.242	27.3555	-65.0944	0.00640504	0.731977	0.265015	152.773	39.7739	-24.6256	0.312875	0.578686	0.146674	Mitochondrial outer membrane protein required for normal mitochondrial morphology and inheritance; localizes to dots on mitochondrial surface near mtDNA nucleoids; ubiquitination target of Mdm30p; interacts genetically with MDM31 and MDM32
YGL221C	NIF3	252.782	18.9113	0.957509	188.976	28.767	63.8066	0.00146293	0.715817	-0.190944	229.67	21.36	23.1118	0.0547375	0.869964	-0.0511596	199.264	35.3286	53.5185	0.0116413	0.754787	-0.0973955	Protein of unknown function, similar to Listeria monocytogenes major sigma factor (rpoD gene product); the authentic, non-tagged protein is detected in highly purified mitochondria in high-throughput studies
YGL224C	SDT1	292.484	12.259	1.10789	260.941	15.3497	31.5429	0.00213401	0.988413	-0.0607622	267.279	14.3119	25.2044	0.00543727	1.01242	-0.0533714	214.536	10.7234	77.948	1.69331e-08	0.812636	-0.173389	Pyrimidine nucleotidase; overexpression suppresses the 6-AU sensitivity of transcription elongation factor S-II, as well as resistance to other pyrimidine derivatives
YGL234W	ADE5,7	278.091	30.1227	1.05337	281.827	21.8037	-3.73588	0.778866	1.06752	0.0699799	276.785	24.9528	1.30574	0.926912	1.04843	0.0350822	210.694	7.56662	67.3967	3.58465e-05	0.798083	-0.13942	Bifunctional enzyme of the 'de novo' purine nucleotide biosynthetic pathway, contains aminoimidazole ribotide synthetase and glycinamide ribotide synthetase activities
YGL237C	HAP2	248.166	41.8459	0.940024	264.435	24.4638	-16.2687	0.360418	1.00165	0.111445	262.283	37.8974	-14.1165	0.511241	0.993496	0.0891924	176.668	41.7784	71.4987	0.00790841	0.669196	-0.167426	Subunit of the heme-activated, glucose-repressed Hap2p/3p/4p/5p CCAAT-binding complex, a transcriptional activator and global regulator of respiratory gene expression; contains sequences sufficient for both complex assembly and DNA binding
YGL244W	RTF1	169.138	45.6382	0.640675	143.589	20.4321	25.5488	0.148721	0.543899	-0.0628201	179.739	11.3545	-10.6007	0.499199	0.680829	0.0644998	247.608	18.9953	-78.4699	0.000353626	0.937909	0.367709	Subunit of the RNA polymerase II-associated Paf1 complex; directly or indirectly regulates DNA-binding properties of Spt15p and relative activities of different TATA elements; involved in telomere maintenance
YGL255W	ZRT1	158.973	41.5406	0.602169	211.022	64.2662	-52.0489	0.116202	0.799324	0.22907	244.625	41.9547	-85.6527	0.00237612	0.926611	0.347325	252.969	33.6004	-93.9965	0.000296844	0.958216	0.422286	High-affinity zinc transporter of the plasma membrane, responsible for the majority of zinc uptake; transcription is induced under low-zinc conditions by the Zap1p transcription factor
YGL261C		248.417	33.9898	0.940972	235.921	10.6572	12.4958	0.303047	0.893639	0.00253889	225.153	49.4325	23.2641	0.339125	0.852851	-0.0523645	177.978	16.5537	70.4391	7.82521e-05	0.674157	-0.163308	Putative protein of unknown function; mRNA expression appears to be regulated by SUT1 and UPC2; YGL261C is not an essential gene
YGR028W	MSP1	268.53	17.3043	1.01716	212.012	28.4545	56.5179	0.00283482	0.803075	-0.160173	227.567	45.9679	40.9631	0.082341	0.861995	-0.116511	187.57	21.4355	80.96	2.57887e-05	0.710491	-0.194779	Mitochondrial protein involved in sorting of proteins in the mitochondria; putative membrane-spanning ATPase
YGR038W	ORM1	298.493	37.5294	1.13066	230.938	38.2902	67.5553	0.00643533	0.874764	-0.195967	262.012	30.5621	36.4806	0.060654	0.992471	-0.0952193	298.176	19.9757	0.316541	0.98342	1.12946	0.123173	Evolutionarily conserved protein with similarity to Orm2p, required for resistance to agents that induce the unfolded protein response; human ortholog is located in the endoplasmic reticulum
YGR052W	FMP48	277.668	38.8357	1.05177	230.157	19.4494	47.5112	0.00593836	0.871806	-0.124223	279.185	13.1444	-1.51736	0.911733	1.05752	0.0457149	265.683	22.1927	11.9847	0.445367	1.00638	0.0702986	Putative protein of unknown function; the authentic, non-tagged protein is detected in highly purified mitochondria in high-throughput studies; induced by treatment with 8-methoxypsoralen and UVA irradiation
YGR053C		259.143	31.8097	0.981604	212.404	9.32174	46.7394	0.00201348	0.804561	-0.125018	221.284	33.6987	37.8598	0.0532439	0.838196	-0.106107	216.091	22.6472	43.0522	0.0092046	0.818528	-0.0551	Uncharacterized
YGR058W		257.071	30.7254	0.973754	207.96	24.8155	49.1111	0.00412874	0.787727	-0.134418	247.739	15.3017	9.33152	0.432936	0.938407	0.00165598	219.277	20.7826	37.7935	0.0112111	0.830596	-0.0360444	Penta-EF-hand protein required for polar bud growth and cell wall abscission; binds calcium and zinc with different affinity; localizes to bud site in G1, bud neck in G2
YGR080W	TWF1	253.572	32.3881	0.960501	227.365	34.8496	26.2069	0.165714	0.861233	-0.0483621	223.467	17.8377	30.105	0.0311639	0.846467	-0.077535	189.738	20.2185	63.8344	0.000260142	0.718705	-0.136142	Twinfilin, highly conserved actin monomer-sequestering protein involved in regulation of the cortical actin cytoskeleton, composed of two cofilin-like regions, localizes actin monomers to sites of rapid filament assembly
YGR092W	DBF2	156.601	46.0828	0.593185	185.437	36.3976	-28.8366	0.189719	0.702415	0.140668	159.625	2.42092	-3.02372	0.840627	0.604639	0.0339945	267.6	45.4377	-110.999	0.000678585	1.01363	0.4857	Ser/Thr kinase involved in transcription and stress response; functions as part of a network of genes in exit from mitosis; localization is cell cycle regulated; activated by Cdc15p during the exit from mitosis
YGR105W	VMA21	78.4437	46.2743	0.297135	95.9527	21.5863	-17.5089	0.323364	0.363457	0.0820699	108.277	11.211	-29.8329	0.0785076	0.410139	0.124295	155.465	34.6053	-77.0211	0.00223399	0.588882	0.324431	Integral membrane protein that is required for vacuolar H+-ATPase (V-ATPase) function, although not an actual component of the V-ATPase complex; functions in the assembly of the V-ATPase; localized to the yeast endoplasmic reticulum (ER)
YGR106C		261.436	39.7807	0.990286	295.373	36.4061	-33.9375	0.108083	1.11884	0.181036	278.772	43.8678	-17.3369	0.446977	1.05596	0.103301	198.283	32.212	63.1522	0.00436626	0.751073	-0.130281	Endoplasmic reticulum protein that functions, together with other assembly factors, in assembly of the V0 sector of the vacuolar ATPase (V-ATPase); null mutation enhances the V-ATPase deficiency of a vma21 mutant impaired in ER retrieval
YGR123C	PPT1	246.383	39.2283	0.93327	294.726	16.9454	-48.3429	0.00462907	1.11639	0.232581	268.74	24.9148	-22.3562	0.185353	1.01795	0.120147	223.466	25.2778	22.9174	0.177677	0.846462	0.0158515	Protein serine/threonine phosphatase with similarity to human phosphatase PP5; present in both the nucleus and cytoplasm; expressed during logarithmic growth; computational analyses suggest roles in phosphate metabolism and rRNA processing
YGR157W	CHO2	137.998	12.3016	0.52272	143.176	51.4129	-5.17784	0.81738	0.542333	0.0473172	169.49	15.8085	-31.4923	0.00259009	0.642009	0.139152	184.036	24.9198	-46.0379	0.00462512	0.697106	0.231885	Phosphatidylethanolamine methyltransferase (PEMT), catalyzes the first step in the conversion of phosphatidylethanolamine to phosphatidylcholine during the methylation pathway of phosphatidylcholine biosynthesis
YGR188C	BUB1	136.85	26.0117	0.518371	125.544	34.709	11.3056	0.508775	0.475546	-0.0153507	164.336	22.9144	-27.4858	0.0479382	0.622483	0.123811	182.581	26.3321	-45.7311	0.00651305	0.691594	0.230245	Protein kinase that forms a complex with Mad1p and Bub3p that is crucial in the checkpoint mechanism required to prevent cell cycle progression into anaphase in the presence of spindle damage, associates with centromere DNA via Skp1p
YGR201C		286.433	24.8322	1.08497	292.44	34.5249	-6.00736	0.719145	1.10773	0.0802588	287.729	28.4698	-1.29637	0.928282	1.08988	0.0461395	222.282	16.0578	64.1513	2.17112e-05	0.841976	-0.12365	Uncharacterized
YGR203W		269.653	31.3626	1.02141	290.489	44.6405	-20.8359	0.349457	1.10034	0.133059	284.174	39.0487	-14.5214	0.465368	1.07642	0.0938191	206.395	14.0195	63.2582	0.000195974	0.781799	-0.127259	Phosphatase with sequence similarity to Acr2p and Cdc25p; member of the single-domain rhodanese homology superfamily; green fluorescent protein (GFP)-fusion protein localizes to both the cytoplasm and the nucleus
YGR205W		272.841	24.6207	1.03349	284.952	17.8549	-12.1108	0.276205	1.07936	0.100649	276.265	20.0812	-3.42335	0.767047	1.04646	0.0522398	211.126	22.1978	61.715	0.000262228	0.79972	-0.120085	ATP-binding protein of unknown function; crystal structure resembles that of E.coli pantothenate kinase and other small kinases
YGR224W	AZR1	234.295	26.4318	0.887481	292.567	22.7796	-58.2716	0.000551486	1.10821	0.267762	247.772	25.8989	-13.4773	0.339117	0.938532	0.0847747	207.607	30.3606	26.6885	0.106151	0.786389	-0.00346984	Plasma membrane transporter of the major facilitator superfamily, involved in resistance to azole drugs such as ketoconazole and fluconazole
YGR231C	PHB2	269.426	39.7409	1.02055	205.158	13.694	64.2678	0.00104547	0.777113	-0.189349	246.473	32.2133	22.953	0.241744	0.933609	-0.0481621	194.409	35.5909	75.0168	0.00256761	0.736397	-0.171894	Subunit of the prohibitin complex (Phb1p-Phb2p), a 1.2 MDa ring-shaped inner mitochondrial membrane chaperone that stabilizes newly synthesized proteins; determinant of replicative life span; involved in mitochondrial segregation
YGR233C	PHO81	234.749	26.4348	0.8892	306.819	25.7283	-72.0697	0.000263136	1.16219	0.320119	273.757	47.2009	-39.0079	0.107506	1.03696	0.181547	203.401	30.7078	31.3479	0.0689036	0.770459	-0.0209298	Cyclin-dependent kinase (CDK) inhibitor, regulates Pho80p-Pho85p and Pcl7p-Pho85p cyclin-CDK complexes in response to phosphate levels; inhibitory activity for Pho80p-Pho85p requires myo-D-inositol heptakisphosphate (IP7) generated by Vip1p
YGR247W	CPD1	284.389	30.0892	1.07723	287.616	35.607	-3.22637	0.856682	1.08945	0.0693144	290.568	34.366	-6.17919	0.72343	1.10064	0.0643409	216.091	34.1347	68.2978	0.00254085	0.818528	-0.140208	Cyclic nucleotide phosphodiesterase, hydrolyzes ADP-ribose 1'', 2''-cyclic phosphate to ADP-ribose 1''-phosphate; may have a role in tRNA splicing; no detectable phenotype is conferred by null mutation or by overexpression
YGR255C		334.865	38.5676	1.26843	302.319	20.6676	32.5463	0.045649	1.14515	-0.0560548	293.291	30.6388	41.5739	0.0337835	1.11095	-0.109277	258.763	37.9777	76.1024	0.00275139	0.980162	-0.14874	Putative flavin-dependent monooxygenase, involved in ubiquinone (Coenzyme Q) biosynthesis; localizes to the matrix face of the mitochondrial inner membrane in a large complex with other ubiquinone biosynthetic enzymes
YGR276C	RNH70	289.459	42.6043	1.09643	266.865	28.5408	22.5933	0.225779	1.01085	-0.0274695	272.73	27.3675	16.7284	0.355581	1.03307	-0.0217007	214.913	23.8241	74.5459	0.000513647	0.814064	-0.161763	3'-5' exoribonuclease; required for maturation of 3' ends of 5S rRNA and tRNA-Arg3 from dicistronic transcripts
YGR287C		274.041	27.0151	1.03803	215.746	14.276	58.2954	6.2899e-05	0.817218	-0.1658	239.822	17.6141	34.2193	0.00852346	0.908416	-0.0901732	216.773	15.6503	57.2684	9.91239e-05	0.821108	-0.102742	Isomaltase (alpha-D-glucosidase); may interact with ribosomes, based on co-purification experiments; authentic, non-tagged protein detected in purified mitochondria in high-throughput studies
YHL010C		269.993	27.1725	1.0227	222.845	15.038	47.1473	0.000536369	0.844112	-0.124385	236.921	30.8549	33.0715	0.0564242	0.897429	-0.0864082	194.236	19.9451	75.7568	2.1639e-05	0.735742	-0.17446	Putative protein of unknown function that is required for growth on ethanol; contains a zinc finger region and has homology to human BRAP2, which is a cytoplasmic protein that binds nuclear localization sequences
YHL014C	YLF2	266.528	27.9903	1.00958	252.442	23.934	14.0865	0.317613	0.956218	0.000149638	246.567	29.1168	19.9616	0.214431	0.933964	-0.0372482	194.803	31.3449	71.7256	0.00110176	0.737889	-0.160634	Protein of unknown function, has weak similarity to E. coli GTP-binding protein gtp1; the authentic, non-tagged protein is detected in highly purified mitochondria in high-throughput studies
YHL020C	OPI1	254.673	25.2629	0.96467	322.154	9.71719	-67.4813	4.93553e-06	1.22028	0.306738	253.542	11.1904	1.13085	0.90404	0.960386	0.0323739	291.688	32.7465	-37.0156	0.0426785	1.10488	0.246324	Transcriptional regulator of a variety of genes; phosphorylation by protein kinase A stimulates Opi1p function in negative regulation of phospholipid biosynthetic genes; involved in telomere maintenance
YHL036W	MUP3	257.176	17.4227	0.974152	243.121	36.8065	14.0551	0.411728	0.920913	-0.00160895	249.173	24.9765	8.00335	0.509463	0.943836	0.00670207	186.526	31.7671	70.6505	0.001647	0.706536	-0.160459	Low affinity methionine permease, similar to Mup1p
YHL040C	ARN1	239.872	16.4875	0.908605	223.575	23.6121	16.297	0.175435	0.846874	-0.0135749	216.5	36.4144	23.3712	0.186502	0.820078	-0.0540002	181.687	15.5244	58.1847	1.82918e-05	0.688208	-0.12045	Transporter, member of the ARN family of transporters that specifically recognize siderophore-iron chelates; responsible for uptake of iron bound to ferrirubin, ferrirhodin, and related siderophores
YHR006W	STP2	271.13	32.5325	1.02701	300.223	26.5559	-29.0929	0.0745043	1.13721	0.164632	252.129	27.5774	19.0006	0.236329	0.955035	-0.0329457	208.546	18.3285	62.5841	0.000226183	0.789946	-0.12409	Transcription factor, activated by proteolytic processing in response to signals from the SPS sensor system for external amino acids; activates transcription of amino acid permease genes
YHR021C	RPS27B	46.1776	27.4391	0.174915	46.8746	6.21367	-0.697019	0.943033	0.177555	0.0119107	51.3956	13.2055	-5.21795	0.631834	0.19468	0.0264117	114.186	19.244	-68.0082	8.26492e-05	0.432522	0.276847	Protein component of the small (40S) ribosomal subunit; nearly identical to Rps27Ap and has similarity to rat S27 ribosomal protein
YHR021W-A	ECM12	240.885	50.4133	0.912442	305.617	27.3393	-64.7325	0.00501471	1.15764	0.293558	265.57	29.1458	-24.6854	0.235031	1.00595	0.128178	212.769	11.8754	28.116	0.120762	0.805942	-0.00613141	Non-essential protein of unknown function
YHR025W	THR1	120.862	52.4329	0.45781	127.269	32.49	-6.4071	0.767302	0.48208	0.0485332	144.772	17.6471	-23.9099	0.210724	0.548378	0.107965	63.0211	12.6925	57.8408	0.00699838	0.238716	-0.168735	Homoserine kinase, conserved protein required for threonine biosynthesis; expression is regulated by the GCN4-mediated general amino acid control pathway
YHR034C	PIH1	167.503	28.9451	0.63448	221.596	28.2321	-54.0929	0.00371691	0.839378	0.238525	213.309	54.7445	-45.8064	0.101484	0.807989	0.197619	223.266	26.5659	-55.7629	0.00218913	0.845703	0.281016	Protein of unresolved function; may function in protein folding and/or rRNA processing, interacts with a chaperone (Hsp82p), two chromatin remodeling factors (Rvb1p, Rvb2p) and two rRNA processing factors (Rrp43p, Nop58p)
YHR066W	SSF1	184.05	50.1312	0.697159	236.891	28.1765	-52.8411	0.0173382	0.897314	0.237105	246.743	39.7828	-62.6932	0.0164739	0.934633	0.263966	251.305	7.57633	-67.2556	0.00207389	0.951915	0.331443	Constituent of 66S pre-ribosomal particles, required for ribosomal large subunit maturation; functionally redundant with Ssf2p; member of the Brix family
YHR067W	HTD2	201.022	23.3968	0.761447	202.067	14.5654	-1.04503	0.916769	0.765406	0.0443152	225.58	24.5131	-24.5578	0.080296	0.854469	0.121957	245.677	22.5223	-44.6549	0.00339201	0.930595	0.252907	Mitochondrial 3-hydroxyacyl-thioester dehydratase involved in fatty acid biosynthesis, required for respiratory growth and for normal mitochondrial morphology
YHR075C	PPE1	301.374	38.8912	1.14157	274.914	21.594	26.4601	0.102264	1.04134	-0.0397245	277.06	36.2513	24.3141	0.231842	1.04947	-0.0487194	214.849	45.4382	86.5244	0.00342527	0.813824	-0.202171	Protein with carboxyl methyl esterase activity that may have a role in demethylation of the phosphoprotein phosphatase catalytic subunit; also identified as a small subunit mitochondrial ribosomal protein
YHR076W	PTC7	306.824	24.9359	1.16221	269.1	21.8299	37.724	0.00937609	1.01932	-0.0812965	278.485	42.49	28.3393	0.182328	1.05487	-0.0631816	232.173	23.9695	74.6516	0.000109571	0.879442	-0.154928	Type 2C protein phosphatase; YHR076W is alternatively spliced to create two mRNA isoforms; protein from spliced form localizes to the mitochondria while the one from the unspliced form is localized to the nuclear envelope
YHR079C	IRE1	249.781	24.2577	0.94614	187.857	21.3337	61.9238	0.000228	0.71158	-0.184414	258.923	42.2328	-9.14185	0.645387	0.980768	0.0705815	187.146	36.3351	62.6349	0.00601436	0.708886	-0.133178	Serine-threonine kinase and endoribonuclease; transmembrane protein that mediates the unfolded protein response (UPR) by regulating Hac1p synthesis through HAC1 mRNA splicing; Kar2p binds inactive Ire1p and releases from it upon ER stress
YHR081W	LRP1	101.298	17.5718	0.383704	108.209	7.5611	-6.91125	0.296435	0.409883	0.0465153	117.161	14.3795	-15.8629	0.0724892	0.443791	0.0746677	187.485	7.93483	-86.1868	3.91141e-09	0.710169	0.368673	Nuclear exosome-associated nucleic acid binding protein; involved in RNA processing, surveillance, degradation, tethering, and export; homolog of mammalian nuclear matrix protein C1D involved in regulation of DNA repair and recombination
YHR112C		264.6	30.9816	1.00227	313.786	28.8338	-49.1861	0.00800935	1.18858	0.239431	280.004	28.6014	-15.4036	0.333212	1.06062	0.0964335	198.054	25.1561	66.5464	0.00047114	0.750204	-0.14182	Uncharacterized
YHR113W		274.025	30.6072	1.03797	275.882	33.5619	-1.85729	0.914061	1.04501	0.0620477	267.101	28.2605	6.9232	0.654373	1.01175	0.0132187	207.452	20.7588	66.5732	0.00015286	0.785801	-0.137994	Cytoplasmic aspartyl aminopeptidase; cleaves unblocked N-terminal acidic amino acid residues from peptide substrates; forms a 12 subunit homo-oligomeric complex; M18 metalloprotease family member; may interact with ribosomes
YHR129C	ARP1	222.287	26.6707	0.841996	203.028	14.3835	19.2584	0.0820454	0.769047	-0.0283226	211.376	21.1859	10.9113	0.383267	0.800665	-0.00933499	157.788	18.5031	64.4985	6.26755e-05	0.597683	-0.151693	Actin-related protein of the dynactin complex; required for spindle orientation and nuclear migration; putative ortholog of mammalian centractin
YHR138C		264.656	37.2423	1.00249	282.29	38.7865	-17.6336	0.391939	1.06928	0.119926	247.384	27.5246	17.2727	0.30769	0.937059	-0.0273325	198.97	32.8332	65.6858	0.00322957	0.753676	-0.138536	Uncharacterized
YHR140W		241.365	36.7206	0.914261	289.804	15.217	-48.4385	0.00279204	1.09774	0.231935	252.125	12.5422	-10.7605	0.413063	0.955021	0.0755012	203.558	18.8887	37.8075	0.016982	0.771051	-0.0426414	Uncharacterized
YHR160C	PEX18	358.073	37.9738	1.35634	301.202	31.7897	56.8708	0.00723339	1.14092	-0.143534	335.889	59.6041	22.1838	0.438868	1.27231	-0.0324888	349.447	29.8532	8.6262	0.62274	1.32366	0.116522	Peroxin required for targeting of peroxisomal matrix proteins containing PTS2; interacts with Pex7p; partially redundant with Pex21p
YHR161C	YAP1801	277.014	25.3161	1.0493	212.084	30.889	64.93	0.00189763	0.80335	-0.190334	231.12	20.7434	45.8946	0.00226127	0.875454	-0.13397	269.766	25.8964	7.24875	0.603021	1.02184	0.0879653	Protein involved in clathrin cage assembly; binds Pan1p and clathrin; homologous to Yap1802p, member of the AP180 protein family
YHR167W	THP2	279.956	39.695	1.06044	201.029	25.4813	78.9267	0.000423367	0.761475	-0.242762	260.418	15.0723	19.5385	0.207575	0.986431	-0.0337127	218.295	60.7232	61.661	0.0601255	0.826876	-0.116916	Subunit of the THO complex, which connects transcription elongation and mitotic recombination, and of the TREX complex, which is recruited to activated genes and couples transcription to mRNA export; involved in telomere maintenance
YHR171W	ATG7	271.019	30.4397	1.02659	222.965	26.7006	48.0537	0.00639632	0.844565	-0.127613	241.692	21.0221	29.3264	0.0397856	0.915501	-0.0720746	281.992	42.0493	-10.9728	0.592079	1.06815	0.154488	Autophagy-related protein and dual specificity member of the E1 family of ubiquitin-activating enzymes; mediates the conjugation of Atg12p with Atg5p and Atg8p with phosphatidylethanolamine, required steps in autophagosome formation
YHR184W	SSP1	267.305	38.6326	1.01252	208.617	17.0131	58.6874	0.00104249	0.790218	-0.168637	242.48	21.4554	24.8253	0.120918	0.918483	-0.0555594	253.338	18.593	13.9666	0.34843	0.959614	0.0584731	Protein involved in the control of meiotic nuclear division and coordination of meiosis with spore formation; transcription is induced midway through meiosis
YHR189W	PTH1	282.638	34.028	1.0706	241.37	21.8485	41.2683	0.013399	0.914279	-0.0995776	258.809	24.0343	23.8291	0.136297	0.980336	-0.0495791	207.54	22.0718	75.098	0.000175907	0.786136	-0.166696	One of two (see also PTH2) mitochondrially-localized peptidyl-tRNA hydrolases; dispensable for respiratory growth on rich medium, but required for respiratory growth on minimal medium
YHR210C		255.894	22.6487	0.969294	242.701	21.871	13.1927	0.273565	0.919321	0.00140006	258.796	26.8227	-2.90193	0.829301	0.980286	0.0478253	190.134	23.6349	65.7595	0.000245822	0.720205	-0.142467	Uncharacterized
YIL008W	URM1	162.37	46.0986	0.61504	156.647	15.7015	5.72376	0.725518	0.593359	0.0109162	160.214	31.0025	2.15673	0.912671	0.60687	0.0152021	226.598	20.6401	-64.228	0.00205582	0.858328	0.310942	Ubiquitin-like protein with weak sequence similarity to ubiquitin; depends on the E1-like activating enzyme Uba4p; molecular function of the Urm1p pathway is unknown, but it is required for normal growth, particularly at high temperature
YIL015C-A		236.729	19.1698	0.896702	226.108	16.8467	10.6217	0.28027	0.856469	0.00729163	211.841	14.1146	24.8881	0.0127771	0.802429	-0.0601982	178.487	22.0633	58.2429	0.000391765	0.676085	-0.12198	Putative protein of unknown function
YIL023C		254.592	43.9201	0.964364	214.212	25.5148	40.3803	0.0355558	0.811409	-0.101844	215.219	21.7826	39.3734	0.031924	0.815222	-0.112496	189.002	23.9542	65.59	0.0017369	0.715917	-0.142367	Zinc transporter; localizes to the ER; null mutant is sensitive to calcofluor white, leads to zinc accumulation in cytosol; ortholog of the mouse KE4 and member of the ZIP (ZRT, IRT-like Protein) family
YIL027C	KRE27	256.668	27.8704	0.972226	274.945	25.6538	-18.2774	0.207813	1.04146	0.12076	249.485	24.5346	7.18278	0.600323	0.945019	0.00973711	189.444	25.2671	67.2241	0.000374248	0.71759	-0.147692	Member of a transmembrane complex required for efficient folding of proteins in the ER; null mutant displays induction of the unfolded protein response, and also shows K1 killer toxin resistance
YIL036W	CST6	198.427	27.4441	0.751618	250.972	21.2436	-52.5451	0.00118025	0.950652	0.23887	257.02	20.7616	-58.5925	0.000445111	0.973559	0.250503	244.519	19.4788	-46.0915	0.00222966	0.926207	0.257267	Basic leucine zipper (bZIP) transcription factor of the ATF/CREB family, activates transcription of genes involved in utilization of non-optimal carbon sources; involved in telomere maintenance
YIL039W		265.393	36.5931	1.00528	229.699	22.5744	35.6941	0.0301821	0.870071	-0.0819251	236.81	29.491	28.5827	0.111539	0.897008	-0.0700673	201.609	32.7068	63.7835	0.00373593	0.763672	-0.131024	Conserved phosphoesterase domain-containing protein that acts together with Emp24p/Erv25p in cargo exit from the ER; deletion confers sensitivity to 4-(N-(S-glutathionylacetyl)amino) phenylarsenoxide (GSAO)
YIL076W	SEC28	161.56	21.138	0.61197	152.996	59.2634	8.5639	0.745038	0.579531	-4.60776e-06	124.105	58.5042	37.4548	0.183473	0.470095	-0.118619	226.822	22.9508	-65.2617	0.000210321	0.859173	0.31452	Epsilon-COP subunit of the coatomer; regulates retrograde Golgi-to-ER protein traffic; stabilizes Cop1p, the alpha-COP and the coatomer complex; non-essential for cell growth
YIL085C	KTR7	299.503	40.3279	1.13448	278.632	33.2417	20.8708	0.283691	1.05542	-0.0189287	271.163	22.1288	28.3397	0.0913179	1.02713	-0.0642371	229.704	25.5333	69.7987	0.000842079	0.870092	-0.139596	Putative mannosyltransferase involved in protein glycosylation; member of the KRE2/MNT1 mannosyltransferase family
YIL090W	ICE2	138.791	31.4744	0.525725	25.2491	10.213	113.542	2.42697e-07	0.0956405	-0.402221	111.618	1.69949	27.1736	0.0232836	0.422795	-0.0829526	46.061	7.66752	92.7305	2.92322e-06	0.174473	-0.293422	Integral ER membrane protein with type-III transmembrane domains; mutations cause defects in cortical ER morphology in both the mother and daughter cells
YIL103W	DPH1	266.691	34.2718	1.01019	242.951	12.8439	23.7396	0.071219	0.92027	-0.0363825	233.416	31.1052	33.2747	0.0704392	0.884152	-0.087653	154.097	16.2495	112.594	5.16915e-07	0.583702	-0.31537	Protein required, along with Dph2p, Kti11p, Jjj3p, and Dph5p, for synthesis of diphthamide, which is a modified histidine residue of translation elongation factor 2 (Eft1p or Eft2p); may act in a complex with Dph2p and Kti11p
YIL107C	PFK26	269.658	34.2258	1.02143	244.023	32.7433	25.6354	0.164053	0.92433	-0.0429679	253.151	27.074	16.5073	0.3058	0.958906	-0.0237133	207.567	17.0418	62.0919	0.000283081	0.786237	-0.122839	6-phosphofructo-2-kinase, inhibited by phosphoenolpyruvate and sn-glycerol 3-phosphate; has negligible fructose-2,6-bisphosphatase activity; transcriptional regulation involves protein kinase A
YIL112W	HOS4	241.821	34.4015	0.91599	185.124	9.57317	56.6971	0.000451121	0.701228	-0.166214	205.608	23.0643	36.2138	0.0249593	0.778817	-0.102366	242.426	46.6509	-0.604282	0.978671	0.918279	0.103048	Subunit of the Set3 complex, which is a meiotic-specific repressor of sporulation specific genes that contains deacetylase activity; potential Cdc28p substrate
YIL124W	AYR1	289.55	27.3658	1.09678	255.407	31.9026	34.1424	0.0556858	0.967451	-0.0711981	239.516	28.4654	50.0335	0.00591577	0.907258	-0.147843	220.367	19.9755	69.1822	5.53864e-05	0.834725	-0.141408	NADPH-dependent 1-acyl dihydroxyacetone phosphate reductase found in lipid particles, ER, and mitochondrial outer membrane; involved in phosphatidic acid biosynthesis; required for spore germination; capable of metabolizing steroid hormones
YIL128W	MET18	172.377	22.1212	0.652943	134.309	30.328	38.0679	0.027351	0.508746	-0.109591	121.196	17.2103	51.1805	0.000190883	0.459077	-0.169054	246.409	47.3641	-74.0325	0.0103561	0.933369	0.35225	DNA repair and TFIIH regulator, required for both nucleotide excision repair (NER) and RNA polymerase II (RNAP II) transcription; involved in telomere maintenance
YIL152W		247.599	35.2571	0.937876	192.741	23.0541	54.8584	0.00216374	0.73008	-0.158089	208.052	23.9597	39.5476	0.0187589	0.788075	-0.114162	203.725	22.8228	43.8746	0.00929746	0.771685	-0.0630251	Uncharacterized
YIL155C	GUT2	248.752	26.6675	0.942241	195.162	13.2774	53.5897	0.000109832	0.739249	-0.153053	207.133	31.1176	41.6183	0.0224424	0.784595	-0.12184	194.022	27.2457	54.7294	0.00261926	0.734932	-0.103662	Mitochondrial glycerol-3-phosphate dehydrogenase; expression is repressed by both glucose and cAMP and derepressed by non-fermentable carbon sources in a Snf1p, Rsf1p, Hap2/3/4/5 complex dependent manner
YIL165C		293.496	15.162	1.11173	235.144	14.7628	58.3524	1.27463e-05	0.890696	-0.16211	236.698	19.95	56.7981	0.000244805	0.896584	-0.172899	203.897	45.7926	89.5995	0.00402471	0.772336	-0.217102	Uncharacterized
YIL166C		278.353	22.06	1.05437	228.556	25.5634	49.7974	0.00298656	0.865741	-0.132745	242.43	21.6162	35.9228	0.0086974	0.918296	-0.0960055	223.392	39.6722	54.9609	0.0172523	0.846182	-0.0922049	Uncharacterized
YIR013C	GAT4	276.625	31.9128	1.04782	223.468	27.1836	53.1573	0.00399639	0.84647	-0.145819	226.928	15.2049	49.697	0.000956378	0.859577	-0.148429	232.077	19.0727	44.5482	0.00357616	0.87908	-0.0534826	Protein containing GATA family zinc finger motifs
YIR016W		278.756	18.3802	1.0559	217.144	27.6861	61.6124	0.00142456	0.822516	-0.177418	248.423	35.9136	30.3333	0.0983607	0.940997	-0.0747749	215.46	14.7625	63.2963	5.03724e-06	0.816137	-0.12361	Uncharacterized
YIR029W	DAL2	279.902	24.8396	1.06023	259.083	50.42	20.8191	0.380927	0.981374	-0.0226677	270.471	39.3899	9.43069	0.616812	1.02451	0.0045666	216.119	33.5762	63.783	0.00349715	0.818632	-0.124977	Allantoicase, converts allantoate to urea and ureidoglycolate in the second step of allantoin degradation; expression sensitive to nitrogen catabolite repression and induced by allophanate, an intermediate in allantoin degradation
YJL024C	APS3	279.33	35.8836	1.05807	238.432	34.3527	40.8977	0.0444223	0.903151	-0.0988381	223.471	18.5136	55.8584	0.00111179	0.846482	-0.171378	230.409	38.4779	48.9206	0.0300322	0.872762	-0.0689178	Small subunit of the clathrin-associated adaptor complex AP-3, which is involved in vacuolar protein sorting; related to the sigma subunit of the mammalian clathrin AP-3 complex; suppressor of loss of casein kinase 1 function
YJL029C	VPS53	127.075	50.0335	0.481345	106.976	53.0444	20.099	0.47061	0.405213	-0.0506213	129.574	43.2633	-2.49886	0.917819	0.49081	0.0277565	187.54	28.5527	-60.4649	0.00820362	0.710379	0.281982	Component of the GARP (Golgi-associated retrograde protein) complex, Vps51p-Vps52p-Vps53p-Vps54p, which is required for the recycling of proteins from endosomes to the late Golgi; required for vacuolar protein sorting
YJL042W	MHP1	255.528	23.7602	0.967911	203.215	11.3194	52.313	4.14153e-05	0.769756	-0.146856	224.907	19.3839	30.6217	0.0153796	0.85192	-0.0792106	209.974	24.032	45.5547	0.00383273	0.795355	-0.0660853	Microtubule-associated protein involved in assembly and stabilization of microtubules; overproduction results in cell cycle arrest at G2 phase; similar to Drosophila protein MAP and to mammalian MAP4 proteins
YJL047C	RTT101	246.252	42.8925	0.932772	194.45	12.0988	51.8022	0.00414212	0.736552	-0.146784	202.027	18.7643	44.2251	0.0137438	0.765253	-0.132074	196.614	29.4876	49.6384	0.0164014	0.744748	-0.0854192	Cullin subunit of a Roc1p-dependent E3 ubiquitin ligase complex with a role in anaphase progression; implicated in Mms22-dependent DNA repair; involved with Mms1p in nonfunctional rRNA decay; modified by the ubiquitin-like protein, Rub1p
YJL049W		265.427	18.0491	1.00541	187.652	13.6876	77.7748	2.43535e-07	0.710804	-0.241315	273.134	26.3388	-7.70695	0.544638	1.0346	0.0673984	119.902	17.2632	145.525	5.18621e-09	0.454176	-0.440635	Uncharacterized
YJL078C	PRY3	274.992	32.3266	1.04164	221.84	8.89298	53.1519	0.000460091	0.840304	-0.146126	250.6	26.4322	24.392	0.12583	0.949242	-0.0528119	223.695	29.9612	51.2974	0.00788715	0.847328	-0.0797282	Protein of unknown function
YJL124C	LSM1	232.684	35.2072	0.881379	190.189	16.757	42.4949	0.00598799	0.720413	-0.114252	205.098	26.6836	27.5863	0.0999601	0.776885	-0.0710011	158.939	20.0875	73.7452	0.000105675	0.602041	-0.182386	Lsm (Like Sm) protein; forms heteroheptameric complex (with Lsm2p, Lsm3p, Lsm4p, Lsm5p, Lsm6p, and Lsm7p) involved in degradation of cytoplasmic mRNAs
YJL139C	YUR1	242.264	37.0652	0.917666	195.565	13.6079	46.6986	0.00347848	0.740777	-0.128253	199.808	18.7452	42.456	0.00907257	0.756848	-0.125947	189.521	13.2032	52.7425	0.00144846	0.717884	-0.0988389	Mannosyltransferase of the KTR1 family, involved in protein N-glycosylation; located in the Golgi apparatus
YJL148W	RPA34	189.203	24.6754	0.716677	136.301	17.7942	52.9013	0.000345719	0.516294	-0.1624	161.464	37.726	27.7391	0.151466	0.611605	-0.0778387	202.852	24.3201	-13.6489	0.312495	0.768378	0.130535	RNA polymerase I subunit A34.5
YJL153C	INO1	261.888	30.4815	0.992	212.276	21.7192	49.6121	0.00214636	0.804076	-0.135349	212.714	18.1376	49.1744	0.00120539	0.805734	-0.148571	191.532	18.7894	70.3561	5.46293e-05	0.7255	-0.15738	Inositol 1-phosphate synthase, involved in synthesis of inositol phosphates and inositol-containing phospholipids; transcription is coregulated with other phospholipid biosynthetic genes by Ino2p and Ino4p, which bind the UASINO DNA element
YJL158C	CIS3	280.421	34.7896	1.0622	264.203	15.272	16.2187	0.221621	1.00077	-0.00513793	244.794	42.1651	35.6274	0.114847	0.92725	-0.0945886	215.432	22.899	64.9893	0.000518113	0.816031	-0.129329	Mannose-containing glycoprotein constituent of the cell wall; member of the PIR (proteins with internal repeats) family
YJL160C		284.535	34.278	1.07778	224.576	27.3315	59.9581	0.00209223	0.850668	-0.169992	260.136	46.2631	24.3986	0.293782	0.985363	-0.0514634	209.388	68.1223	75.1465	0.0421906	0.793137	-0.16609	Uncharacterized
YJL163C		266.023	35.9188	1.00766	235.988	25.9123	30.0342	0.0744983	0.893896	-0.0603598	237.259	17.6217	28.7635	0.0509208	0.898709	-0.0706616	195.658	19.3132	70.3647	0.000167298	0.741129	-0.15569	Uncharacterized
YJL164C	TPK1	243.171	35.7226	0.921102	191.117	15.9196	52.0538	0.00146111	0.723929	-0.148355	199.427	15.6963	43.744	0.00491951	0.755405	-0.130695	195.071	18.5067	48.1	0.00331559	0.738905	-0.0808756	cAMP-dependent protein kinase catalytic subunit; promotes vegetative growth in response to nutrients via the Ras-cAMP signaling pathway; inhibited by regulatory subunit Bcy1p in the absence of cAMP; partially redundant with Tpk2p and Tpk3p
YJL165C	HAL5	215.613	32.5284	0.816714	165.814	23.8506	49.7983	0.00370392	0.628084	-0.145344	184.33	11.136	31.2824	0.0165641	0.69822	-0.087459	168.391	20.4447	47.2217	0.00313877	0.637844	-0.0890316	Putative protein kinase; overexpression increases sodium and lithium tolerance, whereas gene disruption increases cation and low pH sensitivity and impairs potassium uptake, suggesting a role in regulation of Trk1p and/or Trk2p transporters
YJL168C	SET2	251.501	19.0116	0.952656	211.686	25.9076	39.8157	0.0108021	0.801839	-0.100326	220.764	27.8449	30.7369	0.0444254	0.836229	-0.0802266	140.911	18.1797	110.591	1.58355e-07	0.533752	-0.314112	Histone methyltransferase with a role in transcriptional elongation, methylates a lysine residue of histone H3; associates with the C-terminal domain of Rpo21p; histone methylation activity is regulated by phosphorylation status of Rpo21p
YJL172W	CPS1	236.693	20.2586	0.896565	191.711	9.29128	44.9823	3.60182e-05	0.726178	-0.12287	211.789	30.8904	24.9047	0.118139	0.802229	-0.0602667	185.649	27.0958	51.0438	0.00361929	0.703218	-0.0947255	Vacuolar carboxypeptidase yscS; expression is induced under low-nitrogen conditions
YJL192C	SOP4	266.439	27.3847	1.00924	217.661	18.9986	48.778	0.000961736	0.824473	-0.131275	214.02	21.9874	52.4186	0.00110819	0.810683	-0.160204	215.831	14.3148	50.6078	0.000266373	0.817542	-0.0806799	ER-membrane protein; suppressor of pma1-7, deletion of SOP4 slows down the export of wild-type Pma1p and Pma1-7 from the ER
YJL193W		261.252	28.1083	0.98959	212.172	18.7367	49.0797	0.000955247	0.803682	-0.13346	214.863	32.6984	46.3888	0.0170649	0.813874	-0.138111	180.775	15.4936	80.4765	3.51373e-06	0.684754	-0.19598	Uncharacterized
YJL196C	ELO1	254.79	25.6745	0.965114	204.508	17.2345	50.2824	0.000375344	0.774651	-0.139313	222.82	33.2273	31.9702	0.075275	0.844015	-0.0844247	202.464	14.6517	52.3259	0.000137437	0.76691	-0.0920416	Elongase I, medium-chain acyl elongase, catalyzes carboxy-terminal elongation of unsaturated C12-C16 fatty acyl-CoAs to C16-C18 fatty acids
YJL197W	UBP12	276.031	19.881	1.04557	251.507	23.4069	24.5235	0.0623519	0.952679	-0.0374766	237.484	17.9498	38.5469	0.00222103	0.89956	-0.106279	211.608	16.8355	64.4232	1.9766e-05	0.801544	-0.129015	Ubiquitin carboxyl-terminal hydrolase, ubiquitin-specific protease present in the nucleus and cytoplasm that cleaves ubiquitin from ubiquitinated proteins
YJL204C	RCY1	133.99	50.8494	0.507538	41.899	28.8175	92.0911	0.000395828	0.158708	-0.32193	128.86	80.0484	5.13052	0.900498	0.488105	-0.000147314	172.361	94.6384	-38.3704	0.390698	0.652881	0.201172	F-box protein involved in recycling plasma membrane proteins internalized by endocytosis; localized to sites of polarized growth
YJL206C		294.178	18.6832	1.11431	229.908	18.3214	64.2697	3.80619e-05	0.870863	-0.184388	265.593	32.6621	28.5848	0.0920372	1.00603	-0.0659319	262.572	27.0862	31.6056	0.036942	0.994591	0.00285576	Uncharacterized
YJL216C		281.391	17.3503	1.06587	230.538	22.2952	50.8528	0.00110806	0.873249	-0.136133	252.965	36.035	28.4257	0.116985	0.9582	-0.0671698	258.335	22.5575	23.0553	0.0614266	0.978543	0.0299154	Uncharacterized
YJR024C		297.073	23.7716	1.12528	250.857	36.6676	46.2158	0.0260508	0.950216	-0.11542	251.337	36.5767	45.736	0.0269336	0.952033	-0.130482	227.161	34.4139	69.9117	0.00238758	0.860458	-0.141037	5'-methylthioribulose-1-phosphate dehydratase; acts in the methionine salvage pathway; potential Smt3p sumoylation substrate; expression downregulated by caspofungin and deletion mutant is caspofungin resistant
YJR032W	CPR7	166.207	29.0016	0.629571	143.807	30.021	22.3998	0.173042	0.544724	-0.0514804	133.293	13.517	32.914	0.00852489	0.504897	-0.100751	222.875	22.7544	-56.6686	0.000834206	0.844225	0.283907	Peptidyl-prolyl cis-trans isomerase (cyclophilin), catalyzes the cis-trans isomerization of peptide bonds N-terminal to proline residues; binds to Hsp82p and contributes to chaperone activity
YJR036C	HUL4	285.704	22.3892	1.08221	258.182	32.9354	27.5213	0.110947	0.977964	-0.0468901	255.558	20.3862	30.1462	0.0199475	0.968021	-0.0730662	210.065	33.3027	75.6387	0.00122362	0.795701	-0.167467	Protein with similarity to hect domain E3 ubiquitin-protein ligases, not essential for viability
YJR048W	CYC1	272.326	27.683	1.03154	265.974	26.857	6.35243	0.659569	1.00748	0.0306094	256.075	14.034	16.2509	0.142979	0.969983	-0.0223581	210.09	22.9422	62.2361	0.000366098	0.795797	-0.122274	Cytochrome c, isoform 1; electron carrier of the mitochondrial intermembrane space that transfers electrons from ubiquinone-cytochrome c oxidoreductase to cytochrome c oxidase during cellular respiration
YJR053W	BFA1	252.859	35.5174	0.957799	193.589	31.4975	59.27	0.00476129	0.733291	-0.173744	220.33	46.7189	32.5291	0.177674	0.834582	-0.0868199	201.718	19.1507	51.1411	0.00222358	0.764082	-0.0883586	Component of the GTPase-activating Bfa1p-Bub2p complex involved in multiple cell cycle checkpoint pathways that control exit from mitosis
YJR054W		283.666	26.2564	1.07449	273.021	20.1716	10.6443	0.392326	1.03417	0.0166288	268.723	21.0589	14.943	0.245877	1.01789	-0.0157718	219.536	40.1614	64.1302	0.00893216	0.831574	-0.124723	Vacuolar protein of unknown function; potential Cdc28p substrate
YJR059W	PTK2	280.289	29.5132	1.0617	235.834	42.2626	44.4541	0.0546524	0.893312	-0.112117	216.745	39.1268	63.5433	0.00839923	0.821005	-0.20035	262.603	43.734	17.686	0.410783	0.994707	0.0497944	Putative serine/threonine protein kinase involved in regulation of ion transport across plasma membrane; enhances spermine uptake
YJR061W		282.172	28.7436	1.06883	259.452	15.7155	22.7204	0.0604969	0.982773	-0.0294138	256.26	21.2042	25.9126	0.059219	0.970681	-0.0575382	214.997	23.8235	67.175	0.000263767	0.814384	-0.136879	Uncharacterized
YJR062C	NTA1	253.29	35.6798	0.959432	207.462	15.2711	45.8281	0.00347117	0.785841	-0.122741	223.312	16.8412	29.9776	0.0401825	0.84588	-0.0770931	182.855	30.3728	70.4348	0.00120743	0.692633	-0.161261	Amidase, removes the amide group from N-terminal asparagine and glutamine residues to generate proteins with N-terminal aspartate and glutamate residues that are targets of ubiquitin-mediated degradation
YJR069C	HAM1	252.711	24.7832	0.95724	203.648	17.0175	49.0633	0.00055482	0.771394	-0.135112	206.861	23.4108	45.8501	0.00378747	0.783566	-0.137299	195.859	11.0237	56.8526	6.26406e-05	0.741889	-0.110054	Conserved protein with deoxyribonucleoside triphosphate pyrophosphohydrolase activity, mediates exclusion of noncanonical purines from deoxyribonucleoside triphosphate pools; mutant is sensitive to the base analog 6-N-hydroxylaminopurine
YJR073C	OPI3	179.385	17.13	0.67949	148.864	24.7084	30.5213	0.0287637	0.563879	-0.0795981	191.58	22.135	-12.1941	0.278172	0.72568	0.0720105	241.569	32.4511	-62.1832	0.00373457	0.915033	0.310287	Phospholipid methyltransferase (methylene-fatty-acyl-phospholipid synthase), catalyzes the last two steps in phosphatidylcholine biosynthesis
YJR078W	BNA2	257.166	25.6099	0.974114	201.558	18.1388	55.6077	0.000286601	0.763479	-0.159007	230.004	27.7354	27.1621	0.0837715	0.871227	-0.0658705	199.694	25.4561	57.4722	0.00133575	0.756417	-0.110545	Putative tryptophan 2,3-dioxygenase or indoleamine 2,3-dioxygenase, required for the de novo biosynthesis of NAD from tryptophan via kynurenine; expresssion is upregulated upon telomere uncapping; regulated by Hst1p and Aft2p
YJR082C	EAF6	251.955	26.7413	0.954375	174.225	8.28841	77.7301	2.47308e-06	0.659943	-0.24385	196.71	15.3127	55.2454	0.000122117	0.745113	-0.172997	136.933	24.5196	115.022	2.01987e-06	0.518686	-0.330708	Subunit of the NuA4 acetyltransferase complex that acetylates histone H4 and NuA3 acetyltransferase complex that acetylates histone H3
YJR083C	ACF4	245.862	28.3529	0.931296	204.572	19.7306	41.2903	0.00428339	0.774894	-0.107044	201.459	23.9483	44.4029	0.00570821	0.763103	-0.132804	186.514	30.773	59.3485	0.00326389	0.706491	-0.122362	Protein of unknown function, computational analysis of large-scale protein-protein interaction data suggests a possible role in actin cytoskeleton organization; potential Cdc28p substrate
YJR094C	IME1	292.805	46.3548	1.10911	262.905	56.1916	29.9007	0.306732	0.995852	-0.0544772	259.876	25.0734	32.93	0.0996391	0.984377	-0.0825885	209.945	37.9737	82.8602	0.00249377	0.795247	-0.191862	Master regulator of meiosis that is active only during meiotic events, activates transcription of early meiotic genes through interaction with Ume6p, degraded by the 26S proteasome following phosphorylation by Ime2p
YJR094W-A	RPL43B	237.806	27.9384	0.900779	185.785	25.6014	52.0209	0.00314224	0.70373	-0.149308	176.562	21.8743	61.2439	0.000422131	0.668794	-0.197755	192.234	17.3294	45.5718	0.00184282	0.728158	-0.0735347	Protein component of the large (60S) ribosomal subunit, identical to Rpl43Ap and has similarity to rat L37a ribosomal protein
YJR095W	SFC1	256.13	20.9134	0.970188	208.144	17.0756	47.9855	0.000279839	0.788425	-0.130343	231.989	11.4393	24.1409	0.0099257	0.878746	-0.0545755	212.47	22.4357	43.6595	0.00310549	0.804811	-0.0586562	Mitochondrial succinate-fumarate transporter, transports succinate into and fumarate out of the mitochondrion; required for ethanol and acetate utilization
YJR097W	JJJ3	250.634	16.5424	0.949372	244.432	20.6875	6.20256	0.548157	0.925878	0.0268222	228.467	14.5348	22.1674	0.0161745	0.865405	-0.0478913	151.938	22.6976	98.6964	1.22826e-05	0.575522	-0.269419	Protein of unknown function, contains a J-domain, which is a region with homology to the E. coli DnaJ protein
YJR099W	YUH1	286.13	38.5333	1.08383	270.031	36.2183	16.0988	0.418324	1.02285	-0.00353757	248.699	25.8963	37.4306	0.0363242	0.942043	-0.100597	217.7	24.637	68.4299	0.000706456	0.824622	-0.139983	Ubiquitin C-terminal hydrolase that cleaves ubiquitin-protein fusions to generate monomeric ubiquitin; hydrolyzes the peptide bond at the C-terminus of ubiquitin; also the major processing enzyme for the ubiquitin-like protein Rub1p
YJR108W	ABM1	272.232	19.547	1.03118	224.209	14.4137	48.0226	7.79158e-05	0.849277	-0.127251	240.69	28.7558	31.5413	0.0454148	0.911706	-0.0802896	240.1	13.2852	32.1314	0.00165324	0.909471	-0.0082798	Protein of unknown function, required for normal microtubule organization
YJR110W	YMR1	270.965	21.8706	1.02638	222.044	22.0052	48.9211	0.00146812	0.841075	-0.130909	249.929	25.0373	21.0358	0.125406	0.946701	-0.0406785	224.208	25.9878	46.7563	0.0049892	0.849274	-0.0642053	Phosphatidylinositol 3-phosphate (PI3P) phosphatase; involved in various protein sorting pathways, including CVT targeting and endosome to vacuole transport; has similarity to the conserved myotubularin dual specificity phosphatase family
YJR124C		266.053	16.3369	1.00778	198.106	23.8298	67.9477	0.000287019	0.7504	-0.203965	240.503	38.3737	25.5502	0.171526	0.910997	-0.0584855	226.448	23.3805	39.6051	0.00653355	0.857759	-0.0391636	Uncharacterized
YJR126C	VPS70	248.174	10.3079	0.940052	184.341	23.9436	63.8326	0.000717624	0.698262	-0.191967	221.162	35.4569	27.0121	0.123147	0.837733	-0.0665967	205.418	25.2015	42.7556	0.00729109	0.778099	-0.0585473	Protein of unknown function involved in vacuolar protein sorting
YJR129C		264.789	14.0155	1.00299	218.514	22.982	46.2748	0.00262311	0.827706	-0.122125	263.718	30.9345	1.07169	0.939	0.99893	0.0340542	227.601	12.9913	37.1885	0.00023383	0.862124	-0.0305366	Uncharacterized
YJR133W	XPT1	247.675	25.8081	0.938162	202.239	13.8778	45.436	0.000751141	0.766056	-0.122383	216.817	28.1718	30.8576	0.0567639	0.821277	-0.0812348	205.484	14.2056	42.1909	0.00139242	0.778348	-0.0566162	Xanthine-guanine phosphoribosyl transferase, required for xanthine utilization and for optimal utilization of guanine
YJR135C	MCM22	265.447	52.1838	1.00548	236.601	29.8581	28.8458	0.181523	0.896215	-0.0559741	254.251	36.9003	11.1957	0.624431	0.963072	-0.00419975	200.015	14.3011	65.4317	0.00323657	0.757632	-0.137245	Protein involved in minichromosome maintenance; component of the kinetochore; binds to centromeric DNA in a Ctf19p-dependent manner
YJR140C	HIR3	256.516	13.385	0.971651	208.82	22.2933	47.696	0.00187298	0.790984	-0.129169	218.108	26.2173	38.408	0.013568	0.826166	-0.108562	237.048	18.2687	19.4675	0.0533967	0.89791	0.033141	Subunit of the HIR complex, a nucleosome assembly complex involved in regulation of histone gene transcription; involved in position-dependent gene silencing and nucleosome reassembly
YJR145C	RPS4A	260.857	25.9407	0.988097	197.173	16.9781	63.6843	6.75226e-05	0.746868	-0.188859	201.355	20.8412	59.5022	0.000330083	0.762709	-0.18784	219.095	35.6713	41.7626	0.037326	0.829905	-0.0495011	Protein component of the small (40S) ribosomal subunit; mutation affects 20S pre-rRNA processing; identical to Rps4Bp and has similarity to rat S4 ribosomal protein
YKL006W	RPL14A	178.119	47.1636	0.674694	182.034	37.3463	-3.91531	0.857249	0.689525	0.0505895	174.914	22.467	3.20506	0.857459	0.662553	0.013498	231.206	21.2891	-53.0873	0.00860661	0.875782	0.275305	N-terminally acetylated protein component of the large (60S) ribosomal subunit, nearly identical to Rpl14Bp and has similarity to rat L14 ribosomal protein; rpl14a csh5 double null mutant exhibits synthetic slow growth
YKL041W	VPS24	190.507	34.0137	0.721617	96.8305	14.6748	93.6765	1.11799e-05	0.366782	-0.316589	151.083	21.2514	39.4237	0.0161926	0.572285	-0.121911	131.805	20.5077	58.7017	0.00111948	0.499262	-0.142977	One of four subunits of the endosomal sorting complex required for transport III (ESCRT-III); forms an ESCRT-III subcomplex with Did4p; involved in the sorting of transmembrane proteins into the multivesicular body (MVB) pathway
YKL069W		144.192	42.0895	0.546181	138.109	21.3498	6.08263	0.708046	0.523141	0.00590732	157.946	28.0267	-13.7539	0.446579	0.598279	0.072853	212.067	28.0144	-67.8758	0.0017653	0.803286	0.317185	Methionine-R-sulfoxide reductase, reduces the R enantiomer of free Met-SO, in contrast to Ycl033Cp which reduces Met-R-SO in a peptide linkage; has a role in protection against oxidative stress
YKL103C	LAP4	285.227	18.6979	1.0804	259.846	39.0865	25.3806	0.183396	0.984266	-0.0388772	263.853	36.9267	21.3741	0.230983	0.999442	-0.0399072	217.633	19.0746	67.5937	3.24085e-05	0.824368	-0.137192	Vacuolar aminopeptidase yscI; zinc metalloproteinase that belongs to the peptidase family M18; often used as a marker protein in studies of autophagy and cytosol to vacuole targeting (CVT) pathway
YKL107W		261.311	18.1546	0.989813	212.135	28.2842	49.1762	0.00576403	0.80354	-0.133813	237.692	42.0586	23.619	0.238815	0.900347	-0.051853	216.201	28.6597	45.1101	0.00953609	0.818942	-0.0619919	Uncharacterized
YKL110C	KTI12	202.835	21.9296	0.768313	156.648	12.8033	46.1867	0.000108486	0.593364	-0.134229	169.079	34.0439	33.7557	0.0635489	0.640451	-0.0986666	209.914	18.4151	-7.07889	0.501809	0.795127	0.111328	Protein that plays a role, with Elongator complex, in modification of wobble nucleosides in tRNA; involved in sensitivity to G1 arrest induced by zymocin; interacts with chromatin throughout the genome; also interacts with Cdc19p
YKL114C	APN1	278.79	20.5494	1.05602	235.484	14.1972	43.3054	0.000224488	0.891987	-0.108066	241.867	50.3389	36.9225	0.137404	0.916164	-0.099729	208.118	14.8518	70.6719	2.03899e-06	0.788326	-0.151534	Major apurinic/apyrimidinic endonuclease, 3'-repair diesterase involved in repair of DNA damage by oxidation and alkylating agents; also functions as a 3'-5' exonuclease to repair 7,8-dihydro-8-oxodeoxyguanosine
YKL149C	DBR1	226.348	30.3909	0.857378	158.368	29.1998	67.9795	0.000990451	0.59988	-0.212057	175.754	14.7581	50.5937	0.000570289	0.665735	-0.159062	171.744	23.0797	54.604	0.0013583	0.650545	-0.112522	RNA lariat debranching enzyme, involved in intron turnover; required for efficient Ty1 transposition
YKL176C	LST4	196.82	35.2832	0.74553	186.996	8.21982	9.82408	0.417841	0.708317	0.00230065	208.43	52.7195	-11.6105	0.645232	0.789509	0.0723093	253.659	16.8481	-56.8388	0.000728808	0.960828	0.297307	Protein possibly involved in a post-Golgi secretory pathway; required for the transport of nitrogen-regulated amino acid permease Gap1p from the Golgi to the cell surface
YKL185W	ASH1	325.89	38.8087	1.23443	311.032	32.8604	14.8582	0.429554	1.17815	0.0091439	303.127	40.8152	22.7632	0.296569	1.14821	-0.0393158	254.529	24.7615	71.3615	0.000522452	0.964124	-0.134521	Zinc-finger inhibitor of HO transcription; mRNA is localized and translated in the distal tip of anaphase cells, resulting in accumulation of Ash1p in daughter cell nuclei and inhibition of HO expression; potential Cdc28p substrate
YKL190W	CNB1	286.199	26.6933	1.08409	233.01	26.1445	53.1883	0.00250266	0.882615	-0.144014	248.599	21.3622	37.6002	0.00875437	0.941661	-0.10123	256.395	18.7402	29.8035	0.0208339	0.971194	0.00635759	Calcineurin B; the regulatory subunit of calcineurin, a Ca++/calmodulin-regulated type 2B protein phosphatase which regulates Crz1p (a stress-response transcription factor), the other calcineurin subunit is encoded by CNA1 and/or CMP1
YKL191W	DPH2	261.393	26.179	0.990126	225.186	17.7157	36.2068	0.00548537	0.852979	-0.0846703	220.006	20.4888	41.3875	0.00388243	0.833355	-0.119146	161.809	29.9012	99.5841	6.3316e-05	0.612913	-0.268299	Protein required, along with Dph1p, Kti11p, Jjj3p, and Dph5p, for synthesis of diphthamide, which is a modified histidine residue of translation elongation factor 2 (Eft1p or Eft2p); may act in a complex with Dph1p and Kti11p
YKL197C	PEX1	233.956	33.0074	0.886198	188.071	20.7663	45.8857	0.00424645	0.712389	-0.126841	193.801	45.426	40.1552	0.0949287	0.734095	-0.118427	217.389	15.6852	16.5677	0.198156	0.823441	0.0347252	AAA-peroxin that heterodimerizes with AAA-peroxin Pex6p and participates in the recycling of peroxisomal signal receptor Pex5p from the peroxisomal membrane to the cystosol; induced by oleic acid and upregulated during anaerobiosis
YKL198C	PTK1	268.639	40.8527	1.01757	227.023	14.7758	41.6165	0.0125787	0.859934	-0.103707	208.271	26.0412	60.3677	0.00289134	0.788907	-0.189998	213	32.0803	55.639	0.00995123	0.806819	-0.0988208	Putative serine/threonine protein kinase that regulates spermine uptake; involved in polyamine transport; possible mitochondrial protein
YKL211C	TRP3	265.605	18.09	1.00608	224.656	23.9602	40.9488	0.00638549	0.850969	-0.101787	222.984	17.0747	42.6207	0.000682058	0.844636	-0.123211	202.511	24.2097	63.0936	0.000462955	0.767087	-0.128322	Bifunctional enzyme exhibiting both indole-3-glycerol-phosphate synthase and anthranilate synthase activities, forms multifunctional hetero-oligomeric anthranilate synthase:indole-3-glycerol phosphate synthase enzyme complex with Trp2p
YKL212W	SAC1	126.659	34.2564	0.479771	78.7832	10.5653	47.8763	0.00279344	0.298421	-0.155922	93.2181	34.4423	33.4414	0.0923563	0.353099	-0.108441	209.181	20.9878	-82.5212	6.44232e-05	0.792351	0.365355	Phosphatidylinositol phosphate (PtdInsP) phosphatase involved in hydrolysis of PtdIns[4]P; transmembrane protein localizes to ER and Golgi; involved in protein trafficking and processing, secretion, and cell wall maintenance
YKL213C	DOA1	199.41	11.6962	0.755342	156.093	19.5444	43.3176	0.00152994	0.59126	-0.124049	176.293	34.2638	23.1177	0.164319	0.667775	-0.0588642	288.007	38.5129	-88.5971	0.00192463	1.09094	0.418683	WD repeat protein required for ubiquitin-mediated protein degradation, forms complex with Cdc48p, plays a role in controlling cellular ubiquitin concentration; also promotes efficient NHEJ in postdiauxic/stationary phase
YKL214C	YRA2	260.524	19.8382	0.986833	206.476	19.8224	54.0483	0.000288454	0.782105	-0.152426	226.227	22.8535	34.297	0.01301	0.856921	-0.0924131	208.534	34.7726	51.9898	0.012266	0.789902	-0.0883795	Member of the REF (RNA and export factor binding proteins) family; when overexpressed, can substitute for the function of Yra1p in export of poly(A)+ mRNA from the nucleus
YKL215C		255.897	18.4456	0.969308	210.19	14.4272	45.7075	0.000145097	0.796173	-0.121761	214.873	19.7522	41.0247	0.00219355	0.813911	-0.118563	194.518	25.3455	61.3796	0.000773242	0.73681	-0.125874	Uncharacterized
YKL220C	FRE2	268.304	23.3025	1.0163	211.283	24.8757	57.0208	0.00111838	0.800315	-0.162124	256.251	31.2858	12.0532	0.44169	0.970647	-0.0070366	231.378	15.5855	36.9259	0.00279206	0.876432	-0.0280775	Ferric reductase and cupric reductase, reduces siderophore-bound iron and oxidized copper prior to uptake by transporters; expression induced by low iron levels but not by low copper levels
YKL222C		254.827	28.2002	0.965253	207.417	25.5355	47.4093	0.00501	0.785672	-0.128422	210.528	35.3965	44.2985	0.0287837	0.797456	-0.131118	222.636	21.3138	32.1908	0.0226631	0.843318	-0.0157569	Protein of unknown function that may interact with ribosomes, based on co-purification experiments; similar to transcriptional regulators from the zinc cluster (binuclear cluster) family; null mutant is sensitive to caffeine
YKR007W	MEH1	197.268	20.9971	0.747228	131.839	14.369	65.4292	4.05759e-06	0.49939	-0.208235	151.793	23.9809	45.4755	0.00353854	0.574972	-0.143861	184.371	27.0727	12.8969	0.344385	0.698376	0.0333431	Component of the EGO complex, which is involved in the regulation of microautophagy, and of the GSE complex, which is required for proper sorting of amino acid permease Gap1p; loss results in a defect in vacuolar acidification
YKR010C	TOF2	254.088	26.3271	0.962456	198.898	11.3318	55.1903	5.93967e-05	0.753402	-0.158044	218.836	19.7667	35.2526	0.00941696	0.828923	-0.0969593	168.076	20.8769	86.0125	7.77378e-06	0.636651	-0.219935	Protein required for rDNA silencing and mitotic rDNA condensation; stimulates Cdc14p phosphatase activity and biphasic release to promote rDNA repeat segregation; required for condensin recruitment to the replication fork barrier site
YKR014C	YPT52	246.896	33.8765	0.93521	179.26	18.9598	67.6356	0.000156987	0.679015	-0.206629	202.843	29.2803	44.0526	0.0178218	0.768344	-0.131328	219.264	18.5321	27.6313	0.0536975	0.830546	-0.00179084	GTPase, similar to Ypt51p and Ypt53p and to mammalian rab5; required for vacuolar protein sorting and endocytosis
YKR019C	IRS4	224.2	22.6626	0.849243	153.389	20.0828	70.8107	3.97091e-05	0.581021	-0.223213	173.55	25.4623	50.65	0.00279842	0.657387	-0.159585	174.348	21.6275	49.8518	0.00121696	0.660411	-0.0954157	EH domain-containing protein involved in regulating phosphatidylinositol 4,5-bisphosphate levels and autophagy; Irs4p and Tax4p bind and activate the PtdIns phosphatase Inp51p; Irs4p and Tax4p are involved in localizing Atg17p to the PAS
YKR020W	VPS51	139.581	27.6134	0.528716	115.903	13.2709	23.6776	0.0375234	0.439028	-0.0616661	126.574	23.937	13.0072	0.340629	0.479446	-0.0291784	197.476	21.1603	-57.8955	0.000410759	0.748017	0.27746	Component of the GARP (Golgi-associated retrograde protein) complex, Vps51p-Vps52p-Vps53p-Vps54p, which is required for the recycling of proteins from endosomes to the late Golgi; links the (VFT/GARP) complex to the SNARE Tlg1p
YKR021W		271.715	19.9927	1.02922	227.089	31.3946	44.6263	0.0155797	0.860184	-0.11449	223.486	2.82134	48.2291	7.20609e-05	0.846537	-0.143576	211.51	22.2681	60.2052	0.000326495	0.801173	-0.114836	Protein proposed to regulate the endocytosis of plasma membrane proteins by recruiting the ubiquitin ligase Rsp5p to its target in the plasma membrane; green fluorescent protein (GFP)-fusion protein localizes to the cytoplasm
YKR023W		249.147	24.4893	0.943739	201.11	17.6473	48.037	0.000519548	0.761781	-0.13194	227.622	13.3483	21.5253	0.0393487	0.862204	-0.0456731	211.029	13.7395	38.1184	0.00135353	0.799351	-0.0405766	Uncharacterized
YKR027W	FMP50	265.603	23.4273	1.00607	185.704	31.2998	79.8995	0.000532929	0.703424	-0.249328	208.509	21.9219	57.0938	0.000496548	0.789809	-0.178034	199.248	36.2072	66.355	0.00433816	0.754728	-0.140677	Member of the ChAPs family of proteins (Chs5p-Arf1p-binding proteins: Bch1p, Bch2p, Bud7p, Chs6p), that forms the exomer complex with Chs5p to mediate export of specific cargo proteins, including Chs3p, from the Golgi to the plasma membrane
YKR028W	SAP190	240.091	31.0659	0.909436	179.129	25.5078	60.9622	0.00103332	0.678519	-0.182717	188.086	19.7443	52.0052	0.00111738	0.712447	-0.162431	244.677	30.4827	-4.58589	0.777855	0.926807	0.117409	Protein that forms a complex with the Sit4p protein phosphatase and is required for its function; member of a family of similar proteins including Sap4p, Sap155p, and Sap185p
YKR029C	SET3	252.059	34.5268	0.95477	177.569	32.1648	74.4899	0.0010633	0.672611	-0.231556	205.033	37.1651	47.0259	0.0305561	0.776641	-0.141847	241.392	34.31	10.6671	0.560563	0.914364	0.064619	Defining member of the SET3 histone deacetylase complex which is a meiosis-specific repressor of sporulation genes; necessary for efficient transcription by RNAPII; one of two yeast proteins that contains both SET and PHD domains
YKR030W	GMH1	247.919	25.6176	0.939087	205.597	16.8157	42.3224	0.001394	0.778775	-0.11054	213.016	16.1389	34.9033	0.00487794	0.806878	-0.096524	184.839	18.693	63.0802	7.13343e-05	0.700147	-0.135641	Golgi membrane protein of unknown function, interacts with Gea1p and Gea2p; required for localization of Gea2p; computational analysis suggests a possible role in either cell wall synthesis or protein-vacuolar targeting
YKR034W	DAL80	249.868	31.0699	0.946471	204.75	17.9996	45.1182	0.00248628	0.775569	-0.120739	220.564	24.04	29.304	0.0550097	0.835471	-0.075034	189.016	16.2159	60.8523	0.000155465	0.71597	-0.126389	Negative regulator of genes in multiple nitrogen degradation pathways; expression is regulated by nitrogen levels and by Gln3p; member of the GATA-binding family, forms homodimers and heterodimers with Deh1p
YKR043C		264.814	31.2831	1.00308	208.417	18.6471	56.3975	0.000483329	0.789458	-0.160463	229.996	14.2995	34.8182	0.0093434	0.871198	-0.0937697	210.841	21.3955	53.9735	0.00116627	0.79864	-0.0941059	Uncharacterized
YKR044W	UIP5	259.588	31.7545	0.983289	200.407	13.2073	59.1811	0.000173648	0.759118	-0.172057	215.289	13.6346	44.2992	0.00193762	0.815489	-0.130435	191.41	35.7385	68.1784	0.00343097	0.725037	-0.15009	Protein of unknown function that interacts with Ulp1p, a Ubl (ubiquitin-like protein)-specific protease for Smt3p protein conjugates
YKR046C	PET10	255.198	14.8879	0.966659	212.832	18.2894	42.3664	0.000980991	0.80618	-0.109246	214.575	15.3592	40.6228	0.000364543	0.812785	-0.117141	184.121	22.1802	71.0775	0.000135459	0.697426	-0.162901	Protein of unknown function that co-purifies with lipid particles; expression pattern suggests a role in respiratory growth; computational analysis of large-scale protein-protein interaction data suggests a role in ATP/ADP exchange
YKR050W	TRK2	298.754	25.7704	1.13164	248.281	25.733	50.4729	0.003121	0.940458	-0.131208	246.445	48.3237	52.3089	0.045354	0.933504	-0.155137	268.889	15.2173	29.8645	0.0113201	1.01852	0.0113577	Component of the Trk1p-Trk2p potassium transport system
YKR053C	YSR3	334.939	44.4835	1.26871	278.105	21.3316	56.8342	0.00416766	1.05343	-0.148039	293.026	46.0641	41.9133	0.103578	1.10995	-0.110552	292.4	10.3212	42.5392	0.0151345	1.10758	-0.0215753	Dihydrosphingosine 1-phosphate phosphatase, membrane protein involved in sphingolipid metabolism; has similarity to Lcb3p
YKR058W	GLG1	298.163	23.1494	1.12941	231.763	23.1701	66.4002	0.000193338	0.877891	-0.191657	278.312	33.6951	19.8519	0.238949	1.05421	-0.0322791	253.374	17.6621	44.7894	0.000778695	0.95975	-0.0454221	Self-glucosylating initiator of glycogen synthesis, also glucosylates n-dodecyl-beta-D-maltoside; similar to mammalian glycogenin
YKR064W		266.223	27.0022	1.00842	212.386	30.0457	53.8363	0.00503226	0.804494	-0.150479	234.916	27.2786	31.3063	0.0483792	0.889835	-0.0802646	216.022	17.1599	50.201	0.000467952	0.818264	-0.079229	Zinc cluster protein; regulates transcription in response to oleate levels; the authentic, non-tagged protein is detected in highly purified mitochondria in high-throughput studies
YKR065C	FMP18	252.039	35.8731	0.954695	197.545	12.2612	54.4945	0.000868798	0.748276	-0.15582	220.083	37.2141	31.9569	0.121791	0.833646	-0.0847704	228.29	27.977	23.7496	0.164281	0.864734	0.0150557	Constituent of the Translocase of the Inner Mitochondrial membrane (TIM23 complex); proposed alternatively to be a component of the import motor (PAM complex) or to interact with and modulate the core TIM23 complex
YKR070W		262.098	23.6487	0.992794	212.696	5.36007	49.4021	6.89488e-05	0.805665	-0.134511	242.178	31.4875	19.9197	0.215453	0.917341	-0.0377273	205.21	23.4086	56.888	0.000703856	0.777309	-0.106277	Uncharacterized
YKR089C	STC1	282.275	29.467	1.06922	242.168	18.0246	40.1074	0.00613263	0.917301	-0.0952533	246.417	30.6369	35.8582	0.0464594	0.933397	-0.095196	190.359	25.4909	91.9161	3.35296e-05	0.721057	-0.230552	Triacylglycerol lipase involved in triacylglycerol mobilization and degradation; found in lipid particles; phosphorylated and activated by Cdc28p; required with Tgl3p for timely bud formation
YKR093W	PTR2	296.435	21.9185	1.12286	246.339	27.3689	50.0962	0.00427448	0.933103	-0.130247	267.167	19.0411	29.2684	0.0158268	1.012	-0.0681964	257.033	25.3565	39.402	0.0108494	0.973611	-0.0257353	Integral membrane peptide transporter, mediates transport of di- and tri-peptides; conserved protein that contains 12 transmembrane domains; PTR2 expression is regulated by the N-end rule pathway via repression by Cup9p
YKR095W	MLP1	267.756	29.6962	1.01423	189.242	21.9455	78.5147	3.867e-05	0.716824	-0.24365	216.099	44.9864	51.6573	0.0379187	0.818556	-0.157131	206.669	32.9601	61.0872	0.00411899	0.782837	-0.119826	Myosin-like protein associated with the nuclear envelope, connects the nuclear pore complex with the nuclear interior; involved with Tel1p in telomere length control; involved with Pml1p and Pml39p in nuclear retention of unspliced mRNAs
YKR099W	BAS1	196.426	42.3566	0.744039	144.596	17.5379	51.8301	0.00464213	0.547713	-0.156892	167.837	34.8474	28.5891	0.16834	0.635747	-0.0800187	185.86	21.2081	10.5664	0.518585	0.704015	0.0418202	Myb-related transcription factor involved in regulating basal and induced expression of genes of the purine and histidine biosynthesis pathways; also involved in regulation of meiotic recombination at specific genes
YKR102W	FLO10	255.976	26.0364	0.969605	198.6	24.6304	57.3757	0.00100126	0.752273	-0.165943	220.356	17.7045	35.6202	0.00597364	0.83468	-0.0980801	192.912	14.3498	63.0634	2.17865e-05	0.730729	-0.13222	Lectin-like protein with similarity to Flo1p, thought to be involved in flocculation
YKR104W		265.512	53.8638	1.00573	253.051	38.6658	12.4611	0.600375	0.958527	0.00610239	220.26	25.2262	45.2523	0.0398772	0.834318	-0.133192	202.349	22.2523	63.1632	0.00608807	0.766474	-0.128624	Putative transporter of the multidrug resistance-associated protein (MRP) subfamily; contains a stop codon in S288C; adjacent ORFs YKR103W and YKR104W are merged in different strain backgrounds
YKR106W		254.603	32.3035	0.964407	201.657	22.7657	52.9464	0.0019501	0.763852	-0.149441	223.965	32.5082	30.6385	0.0955453	0.848352	-0.0794076	213.33	17.5694	41.273	0.00521281	0.808069	-0.0502525	Uncharacterized
YLL006W	MMM1	218.003	49.0989	0.825768	123.238	25.1673	94.765	0.000170957	0.46681	-0.315193	140.554	30.0585	77.4487	0.00156885	0.532402	-0.261987	226.766	67.1123	-8.76276	0.787662	0.858961	0.124027	Mitochondrial outer membrane protein, component of the Mdm10-Mdm12-Mmm1 complex involved in import and assembly of outer membrane beta-barrel proteins
YLL007C		241.45	56.1579	0.914585	158.213	5.95258	83.2375	0.00110057	0.599291	-0.266821	194.586	43.5141	46.8639	0.0850643	0.73707	-0.142761	188.132	15.7068	53.3181	0.0163439	0.712622	-0.101358	Uncharacterized
YLL010C	PSR1	271.902	36.7871	1.02993	233.924	22.6372	37.9775	0.0228957	0.886077	-0.0892677	239.668	15.0068	32.2343	0.0292492	0.907832	-0.0829621	194.125	6.6461	77.7763	6.94985e-05	0.735324	-0.181315	Plasma membrane associated protein phosphatase involved in the general stress response; required along with binding partner Whi2p for full activation of STRE-mediated gene expression, possibly through dephosphorylation of Msn2p
YLL019C	KNS1	251.822	30.4345	0.953871	184.217	12.2163	67.6047	3.23222e-05	0.697792	-0.205523	202.228	31.9945	49.5944	0.011813	0.766013	-0.15161	210.733	29.7229	41.089	0.0226564	0.798231	-0.0507144	Nonessential putative protein kinase of unknown cellular role; member of the LAMMER family of protein kinases, which are serine/threonine kinases also capable of phosphorylating tyrosine residues
YLL025W		267.945	20.6879	1.01494	248.113	25.7841	19.8324	0.144499	0.939821	-0.0213307	246.502	25.1919	21.4432	0.11224	0.933719	-0.0426565	206.058	27.9666	61.8868	0.00137883	0.780524	-0.122776	Putative protein of unknown function; YLL025W is not an essential gene
YLL039C	UBI4	149.225	21.1285	0.565246	122.534	40.5614	26.6911	0.182593	0.464144	-0.0711445	167.91	41.5492	-18.6845	0.344085	0.636021	0.092254	240.725	29.3804	-91.5003	0.000138013	0.911838	0.408769	Ubiquitin, becomes conjugated to proteins, marking them for selective degradation via the ubiquitin-26S proteasome system; essential for the cellular stress response; encoded as a polyubiquitin precursor comprised of 5 head-to-tail repeats
YLL042C	ATG10	240.338	19.2078	0.910373	192.266	27.7763	48.0724	0.00583608	0.72828	-0.133843	208.778	22.1572	31.5601	0.0168312	0.790827	-0.0849517	201.154	18.8741	39.1849	0.00217651	0.761945	-0.0482868	Conserved E2-like conjugating enzyme that mediates formation of the Atg12p-Atg5p conjugate, which is a critical step in autophagy
YLL046C	RNP1	277.153	26.5192	1.04982	228.465	23.9557	48.6883	0.00279266	0.865397	-0.128785	253.568	46.7105	23.5851	0.294979	0.960485	-0.0494441	256.554	13.0054	20.5991	0.0572899	0.971796	0.0374536	Ribonucleoprotein that contains two RNA recognition motifs (RRM)
YLR012C		266.34	33.1669	1.00886	218.8	20.7997	47.5394	0.00671243	0.82879	-0.126604	262.725	37.5909	3.61481	0.855244	0.995171	0.0246443	214.069	20.3749	52.2709	0.00356322	0.810867	-0.0870209	Uncharacterized
YLR015W	BRE2	190.259	35.1518	0.720678	173.67	30.9261	16.5893	0.343811	0.65784	-0.0246423	210.899	37.1671	-20.6396	0.297793	0.798858	0.105566	91.689	13.68	98.5701	2.93965e-06	0.347307	-0.294097	Subunit of the COMPASS (Set1C) complex, which methylates histone H3 on lysine 4 and is required in transcriptional silencing near telomeres; involved in telomere maintenance; similar to trithorax-group protein ASH2L
YLR019W	PSR2	263.337	44.8786	0.99749	238.139	35.6512	25.1983	0.237612	0.902042	-0.0425813	244.943	10.2274	18.3943	0.240799	0.927815	-0.0317709	189.243	15.4391	74.0947	0.000449254	0.716829	-0.170938	Functionally redundant Psr1p homolog, a plasma membrane phosphatase involved in the general stress response; required with Psr1p and Whi2p for full activation of STRE-mediated gene expression, possibly through dephosphorylation of Msn2p
YLR020C	YEH2	269.122	37.8557	1.0194	202.465	17.5161	66.6573	0.000325275	0.766911	-0.198461	229.722	19.0186	39.4	0.0154854	0.870158	-0.110505	185.452	12.229	83.6696	3.46658e-05	0.70247	-0.204796	Steryl ester hydrolase, catalyzes steryl ester hydrolysis at the plasma membrane; involved in sterol metabolism
YLR036C		263.445	24.1663	0.997898	210.196	8.19879	53.2496	3.50472e-05	0.796195	-0.148814	220.15	26.416	43.2949	0.00846547	0.833902	-0.126076	182.818	35.2896	80.6274	0.00118789	0.692491	-0.195638	Uncharacterized
YLR037C	DAN2	263.103	40.1895	0.996601	222.631	10.8645	40.4715	0.0119028	0.8433	-0.100481	216.539	24.6961	46.5642	0.0123818	0.820222	-0.138509	187.299	20.9467	75.8037	0.000219707	0.709466	-0.177509	Cell wall mannoprotein with similarity to Tir1p, Tir2p, Tir3p, and Tir4p; expressed under anaerobic conditions, completely repressed during aerobic growth
YLR039C	RIC1	108.266	49.5818	0.410097	49.564	26.0486	58.7016	0.00791677	0.187742	-0.200619	146.903	23.0422	-38.6369	0.0537426	0.556449	0.161936	115.032	13.8634	-6.76661	0.69247	0.435728	0.0707418	Protein involved in retrograde transport to the cis-Golgi network; forms heterodimer with Rgp1p that acts as a GTP exchange factor for Ypt6p; involved in transcription of rRNA and ribosomal protein genes
YLR048W	RPS0B	88.0656	39.5908	0.333582	62.5275	10.4063	25.5381	0.0797299	0.236847	-0.0790554	74.9337	14.7428	13.132	0.362481	0.28384	-0.0370662	149.167	25.3722	-61.1009	0.00214612	0.565025	0.268137	Protein component of the small (40S) ribosomal subunit, nearly identical to Rps0Ap; required for maturation of 18S rRNA along with Rps0Ap; deletion of either RPS0 gene reduces growth rate, deletion of both genes is lethal
YLR049C		260.089	33.9069	0.985187	228.309	29.3356	31.7809	0.0715495	0.864805	-0.0681673	205.526	19.2784	54.5632	0.00107782	0.778509	-0.169242	206.909	39.2888	53.181	0.0213436	0.783744	-0.0930724	Uncharacterized
YLR056W	ERG3	215.556	36.4549	0.816499	153.439	28.038	62.1168	0.00269465	0.581208	-0.192017	190.222	26.0201	25.3337	0.140753	0.720538	-0.064934	206.785	16.2717	8.77044	0.538611	0.783278	0.0565935	C-5 sterol desaturase, catalyzes the introduction of a C-5(6) double bond into episterol, a precursor in ergosterol biosynthesis; mutants are viable, but cannot grow on non-fermentable carbon sources
YLR061W	RPL22A	42.1232	25.8671	0.159558	17.1739	5.44222	24.9493	0.0142995	0.0650528	-0.0860483	31.8477	8.28878	10.2756	0.268814	0.120635	-0.0328594	102.261	29.3828	-60.1377	0.00219802	0.387352	0.245346	Protein component of the large (60S) ribosomal subunit, has similarity to Rpl22Bp and to rat L22 ribosomal protein
YLR087C	CSF1	222.427	38.4523	0.842526	192.78	35.9422	29.6469	0.155347	0.730227	-0.067645	266.547	49.2323	-44.1197	0.0973487	1.00965	0.199136	298.475	24.1641	-76.0485	0.000414576	1.13059	0.380741	Protein required for fermentation at low temperature; the authentic, non-tagged protein is detected in highly purified mitochondria in high-throughput studies
YLR094C	GIS3	291.403	47.9384	1.1038	279.458	29.5582	11.9451	0.547503	1.05855	0.0132547	292.474	49.808	-1.07118	0.967118	1.10786	0.0460018	226.999	13.6171	64.4036	0.00204732	0.859845	-0.122535	Protein of unknown function
YLR095C	IOC2	266.131	19.2917	1.00807	214.474	32.193	51.657	0.008736	0.812401	-0.142243	239.978	38.5317	26.1528	0.168077	0.909008	-0.0607569	198.757	25.8679	67.3735	0.000474855	0.752868	-0.144315	Member of a complex (Isw1b) with Isw1p and Ioc4p that exhibits nucleosome-stimulated ATPase activity and acts within coding regions to coordinate transcription elongation with termination and processing, contains a PHD finger motif
YLR107W	REX3	272.348	32.8422	1.03162	199.217	34.7036	73.1309	0.00186469	0.754608	-0.222335	238.492	32.0081	33.8559	0.0676899	0.903377	-0.0890405	212.584	32.8882	59.7636	0.00502581	0.805242	-0.112899	RNA exonuclease; required for maturation of the RNA component of RNase MRP; functions redundantly with Rnh70p and Rex2p in processing of U5 snRNA and RNase P RNA; member of RNase D family of exonucleases
YLR126C		280.629	18.6947	1.06299	260.486	15.9169	20.1426	0.0449234	0.98669	-0.0199594	269.436	17.5966	11.1927	0.263325	1.02059	-0.00200311	210.073	26.7762	70.556	0.000456328	0.79573	-0.150329	Uncharacterized
YLR168C		255.556	32.8291	0.968014	246.935	39.2663	8.62076	0.66219	0.935359	0.0186503	233.809	19.2309	21.7465	0.116967	0.88564	-0.0455887	186.901	29.7238	68.6546	0.00112461	0.707958	-0.153574	Mitochondrial intermembrane space protein involved in regulation of mitochondrial cardiolipin and phosphatidylethanolamine levels; null has defects in mitochondrial morphology; similar to Ups1p, Ups3p and to human PRELI
YLR185W	RPL37A	104.391	46.5375	0.39542	95.0689	18.4005	9.32202	0.582419	0.36011	-0.0143534	129.967	34.5759	-25.5761	0.231597	0.492299	0.111905	174.589	31.2519	-70.1984	0.00296979	0.661323	0.309399	Protein component of the large (60S) ribosomal subunit, has similarity to Rpl37Bp and to rat L37 ribosomal protein
YLR190W	MMR1	227.802	42.2857	0.862885	149.985	19.9592	77.817	0.000226276	0.568123	-0.249028	208.061	20.6447	19.7403	0.232651	0.788111	-0.0419844	202.845	36.7581	24.9563	0.238256	0.768353	0.000385748	Phosphorylated protein of the mitochondrial outer membrane, localizes only to mitochondria of the bud; interacts with Myo2p to mediate mitochondrial distribution to buds; mRNA is targeted to the bud via the transport system involving She2p
YLR193C	UPS1	150.004	46.8187	0.568199	178.904	44.7437	-28.9	0.244515	0.677668	0.139584	194.872	20.172	-44.8673	0.0199033	0.738151	0.191543	261.756	43.0686	-111.752	0.000450522	0.991502	0.485805	Mitochondrial intermembrane space protein that regulates mitochondrial cardiolipin levels, null has defects in Mgm1p processing, integrity of mitochondrial inner membrane complexes, and mitochondrial morphology; ortholog of human PRELI
YLR219W	MSC3	258.655	40.3692	0.979754	211.173	16.9937	47.482	0.00608373	0.799898	-0.127929	240.846	29.7142	17.8091	0.330049	0.912295	-0.0302279	226.297	11.3014	32.3575	0.0359546	0.857187	-0.0147935	Protein of unknown function, green fluorescent protein (GFP)-fusion protein localizes to the cell periphery; msc3 mutants are defective in directing meiotic recombination events to homologous chromatids; potential Cdc28p substrate
YLR246W	ERF2	262.8	36.0674	0.995456	220.2	16.1535	42.6	0.00922131	0.834093	-0.108604	229.378	19.7709	33.4226	0.0385052	0.868856	-0.0887733	196.652	25.5938	66.1484	0.00115579	0.744894	-0.141062	Subunit of a palmitoyltransferase, composed of Erf2p and Shr5p, that adds a palmitoyl lipid moiety to heterolipidated substrates such as Ras1p and Ras2p through a thioester linkage; mutants partially mislocalize Ras2p to the vacuole
YLR248W	RCK2	257.935	20.6392	0.977026	204.001	19.8723	53.9339	0.00030335	0.772731	-0.152513	220.83	15.2258	37.105	0.00117877	0.836477	-0.103422	204.385	13.0112	53.55	1.81973e-05	0.774185	-0.0953681	Protein kinase involved in the response to oxidative and osmotic stress; identified as suppressor of S. pombe cell cycle checkpoint mutations
YLR262C-A	RBF7	277.227	15.2426	1.0501	249.215	38.231	28.0124	0.138166	0.943994	-0.0504522	256.239	19.9484	20.9876	0.0571903	0.970604	-0.0395944	190.534	31.7385	86.693	0.000560389	0.721719	-0.212871	Protein of unknown that associates with ribosomes; null mutant exhibits translation defects, altered polyribosome profiles, and resistance to the translation inhibitor anisomcyin
YLR264W	RPS28B	198.551	24.905	0.752088	201.46	33.8605	-2.90913	0.861026	0.763108	0.0508801	210.207	33.4304	-11.6552	0.484924	0.796237	0.0727278	245.894	20.1507	-47.3423	0.0015174	0.931415	0.262057	Protein component of the small (40S) ribosomal subunit; nearly identical to Rps28Ap and has similarity to rat S28 ribosomal protein
YLR289W	GUF1	253.924	38.3747	0.961833	248.526	36.9262	5.39775	0.785477	0.941387	0.0305311	249.348	15.3267	4.57561	0.74296	0.944501	0.0192178	181.813	38.2177	72.1104	0.0040057	0.688687	-0.167344	Mitochondrial matrix GTPase that associates with mitochondrial ribosomes; important for translation under temperature and nutrient stress; may have a role in translational fidelity; similar to bacterial LepA elongation factor
YLR319C	BUD6	301.727	29.8896	1.14291	238.346	25.6878	63.3814	0.00089496	0.902826	-0.179507	266.977	36.0731	34.7506	0.081029	1.01128	-0.0882004	270.285	37.4706	31.442	0.118684	1.02381	0.00662145	Actin- and formin-interacting protein, involved in actin cable nucleation and polarized cell growth; isolated as bipolar budding mutant; potential Cdc28p substrate
YLR330W	CHS5	256.257	20.1589	0.970671	301.923	19.9787	-45.6662	0.00122723	1.14365	0.224424	286.883	30.4681	-30.6264	0.0625029	1.08668	0.152894	291.612	39.1294	-35.3553	0.0819314	1.10459	0.240696	Component of the exomer complex, which also contains Csh6p, Bch1p, Bch2p, and Bud7p and is involved in export of selected proteins, such as chitin synthase Chs3p, from the Golgi to the plasma membrane
YLR335W	NUP2	289.84	31.3957	1.09788	205.572	25.1883	84.2679	6.01236e-05	0.77868	-0.261009	212.1	44.8261	77.7396	0.00576589	0.803409	-0.252749	251.701	17.3361	38.1381	0.00742242	0.953414	-0.0236961	Nucleoporin involved in nucleocytoplasmic transport, binds to either the nucleoplasmic or cytoplasmic faces of the nuclear pore complex depending on Ran-GTP levels; also has a role in chromatin organization
YLR337C	VRP1	53.2296	16.1556	0.201627	55.0295	39.6875	-1.79986	0.919842	0.208445	0.0175039	79.1714	41.167	-25.9418	0.192921	0.299892	0.105926	196.616	70.9777	-143.386	0.00380278	0.744758	0.565309	Proline-rich actin-associated protein involved in cytoskeletal organization and cytokinesis; related to mammalian Wiskott-Aldrich syndrome protein (WASP)-interacting protein (WIP)
YLR346C		286.062	35.2676	1.08357	231.478	32.3666	54.5837	0.00873215	0.876812	-0.149327	275.097	35.1098	10.9655	0.55856	1.04203	-0.000360456	278.116	22.9893	7.94587	0.594367	1.05347	0.0890946	Uncharacterized
YLR368W	MDM30	284.602	22.5197	1.07804	263.913	23.6658	20.6898	0.120327	0.999669	-0.0212345	260.626	13.5093	23.9767	0.0231886	0.987218	-0.0498555	219.805	25.0057	64.7975	0.00044985	0.832594	-0.126861	F-box protein; associates with mitochondria and has a role in mitochondrial fusion; stimulates nuclear export of specific mRNAs; promotes ubiquitin-mediated degradation of Gal4p in some strains
YLR370C	ARC18	180.384	38.5937	0.683272	160.757	32.7948	19.627	0.299725	0.608928	-0.0381312	166.451	28.9548	13.9328	0.426885	0.630497	-0.0268114	230.016	24.9378	-49.6319	0.00757971	0.871272	0.263159	Subunit of the ARP2/3 complex, which is required for the motility and integrity of cortical actin patches
YLR380W	CSR1	262.879	16.0794	0.995755	273.892	21.7049	-11.0129	0.316505	1.03747	0.0944904	244.065	38.9135	18.8144	0.303664	0.924488	-0.0334279	195.434	42.4373	67.4452	0.0099574	0.74028	-0.145941	Phosphatidylinositol transfer protein with a potential role in regulating lipid and fatty acid metabolism under heme-depleted conditions; interacts specifically with thioredoxin peroxidase; may have a role in oxidative stress resistance
YLR384C	IKI3	159.523	31.2075	0.604254	113.885	12.9868	45.6374	0.00226106	0.431384	-0.140844	133.45	35.4626	26.0731	0.174743	0.505492	-0.0758	172.667	27.8323	-13.1437	0.410618	0.65404	0.116255	Subunit of Elongator complex, which is required for modification of wobble nucleosides in tRNA; maintains structural integrity of Elongator; homolog of human IKAP, mutations in which cause familial dysautonomia (FD)
YLR385C	SWC7	285.479	21.9939	1.08136	244.452	17.8117	41.0266	0.00175004	0.925954	-0.098092	264.547	13.0654	20.9318	0.0381515	1.00207	-0.0381955	206.123	23.2234	79.3559	4.83291e-05	0.780768	-0.181641	Protein of unknown function, component of the Swr1p complex that incorporates Htz1p into chromatin
YLR388W	RPS29A	139.969	34.8138	0.530187	147.377	25.7899	-7.40806	0.634743	0.558248	0.0561607	170.57	24.7514	-30.6009	0.0606836	0.646099	0.13606	214.887	21.8207	-74.9175	0.000116691	0.813965	0.342099	Protein component of the small (40S) ribosomal subunit; nearly identical to Rps29Bp and has similarity to rat S29 and E. coli S14 ribosomal proteins
YLR390W-A	CCW14	255.113	16.4811	0.966339	202.717	12.3791	52.396	1.02635e-05	0.767869	-0.147254	218.72	20.85	36.3929	0.00576424	0.828487	-0.101131	201.076	22.7082	54.0371	0.000868971	0.761653	-0.0983885	Covalently linked cell wall glycoprotein, present in the inner layer of the cell wall
YLR394W	CST9	256.456	28.9028	0.971423	203.513	24.7657	52.9428	0.00215631	0.770882	-0.149055	209.748	9.06398	46.7079	0.000525948	0.794499	-0.14001	181.557	35.1245	74.8986	0.0016829	0.687716	-0.17685	SUMO E3 ligase; required for synaptonemal complex formation; localizes to synapsis initiation sites on meiotic chromosomes; potential Cdc28p substrate
YLR418C	CDC73	241.369	33.6968	0.914276	164.766	19.3066	76.6029	4.77181e-05	0.624113	-0.241706	200.034	19.1994	41.335	0.00745736	0.757703	-0.12183	307.48	33.4022	-66.1114	0.00296386	1.1647	0.350992	Constituent of Paf1 complex with RNA polymerase II, Paf1p, Hpr1p, Ctr9, Leo1, Rtf1 and Ccr4p, distinct from Srb-containing Pol II complexes; required for expression of certain genes, modification of some histones, and telomere maintenance
YLR431C	ATG23	251.14	32.8087	0.951287	200.685	23.4281	50.4545	0.00324394	0.760171	-0.140697	230.45	32.8019	20.6902	0.24825	0.872915	-0.0422229	222.464	22.7811	28.6753	0.0593736	0.842668	-0.00397701	Peripheral membrane protein required for the cytoplasm-to-vacuole targeting (Cvt) pathway and efficient macroautophagy; cycles between the phagophore assembly site (PAS) and non-PAS locations; forms a complex with Atg9p and Atg27p
YLR432W	IMD3	266.463	22.0683	1.00933	210.781	26.9043	55.6816	0.00209667	0.798413	-0.157421	221.712	42.6488	44.751	0.0507729	0.839816	-0.131157	218.24	30.663	48.2228	0.00978565	0.826665	-0.0716362	Inosine monophosphate dehydrogenase, catalyzes the first step of GMP biosynthesis, member of a four-gene family in S. cerevisiae, constitutively expressed
YLR446W		265.597	23.2436	1.00605	221.773	12.7223	43.8241	0.000249934	0.840048	-0.11268	217.47	21.2986	48.1268	0.00130015	0.82375	-0.144069	176.263	29.6105	89.3338	0.00015895	0.667663	-0.22772	Uncharacterized
YLR448W	RPL6B	165.656	31.9361	0.627483	107.586	20.2198	58.0696	0.0008469	0.407523	-0.186704	144.461	36.9577	21.1943	0.278541	0.547202	-0.0564371	148.288	19.588	17.3679	0.214757	0.561696	0.00323571	Protein component of the large (60S) ribosomal subunit, has similarity to Rpl6Ap and to rat L6 ribosomal protein; binds to 5.8S rRNA
YLR450W	HMG2	255.402	15.1507	0.96743	217.292	21.4902	38.1094	0.00510949	0.823076	-0.09308	219.291	25.4486	36.1111	0.0155076	0.830646	-0.100022	193.685	25.2381	61.7167	0.000884113	0.733655	-0.127358	One of two isozymes of HMG-CoA reductase that convert HMG-CoA to mevalonate, a rate-limiting step in sterol biosynthesis; overproduction induces assembly of peripheral ER membrane arrays and short nuclear-associated membrane stacks
YLR452C	SST2	231.012	48.1087	0.875045	169.077	18.2094	61.9354	0.00306586	0.640441	-0.188226	182.882	10.8234	48.1296	0.0119211	0.692736	-0.149058	202.175	28.296	28.8369	0.153382	0.765814	-0.0129757	GTPase-activating protein for Gpa1p, regulates desensitization to alpha factor pheromone; also required to prevent receptor-independent signaling of the mating pathway; member of the RGS (regulator of G-protein signaling) family
YLR460C		228.671	24.7047	0.866178	179.05	26.4719	49.6212	0.00392488	0.678219	-0.142052	202.791	28.347	25.88	0.0950721	0.768147	-0.0651157	192.773	48.4382	35.8981	0.137836	0.7302	-0.0406979	Uncharacterized
YML003W		262.077	27.5755	0.992714	266.068	17.457	-3.99157	0.728341	1.00783	0.0677334	260.128	10.9433	1.94844	0.845504	0.985334	0.0303427	198.06	31.9677	64.0166	0.00251382	0.750227	-0.133289	Uncharacterized
YML005W	TRM12	271.413	20.1051	1.02808	255.185	30.2998	16.2279	0.278188	0.966611	-0.00698103	257.529	20.4473	13.8842	0.213818	0.975488	-0.0135247	197.545	32.4854	73.8682	0.0013216	0.748276	-0.166715	S-adenosylmethionine-dependent methyltransferase of the seven beta-strand family; required for wybutosine formation in phenylalanine-accepting tRNA
YML006C	GIS4	259.886	26.1214	0.984417	254.913	29.3841	4.97307	0.740082	0.965579	0.0333367	211.323	21.625	48.5628	0.0016208	0.800466	-0.146542	223.819	21.0399	36.0666	0.0100666	0.847801	-0.02833	CAAX box containing protein of unknown function, proposed to be involved in the RAS/cAMP signaling pathway
YML013W	SEL1	184.846	82.4517	0.700174	54.0879	51.8535	130.758	0.00164286	0.204878	-0.458186	185.163	45.9179	-0.317291	0.992256	0.701375	0.0278085	211.929	81.1162	-27.0831	0.533892	0.802761	0.179607	Protein involved in ER-associated protein degradation; proposed to coordinate the assembly of proteins involved in ERAD; contains a UBX (ubiquitin regulatory X) domain and a ubiquitin-associated (UBA) domain
YML016C	PPZ1	265.447	26.7493	1.00548	271.591	16.3253	-6.1434	0.577427	1.02875	0.076561	255.683	16.923	9.76466	0.386522	0.968495	0.00122099	184.317	37.9717	81.1307	0.00175433	0.698169	-0.19671	Serine/threonine protein phosphatase Z, isoform of Ppz2p; involved in regulation of potassium transport, which affects osmotic stability, cell cycle progression, and halotolerance
YML026C	RPS18B	151.688	29.4923	0.574576	124.616	17.3617	27.0724	0.0365768	0.472029	-0.0720945	155.591	30.0638	-3.90287	0.805012	0.589359	0.0366175	196.316	19.4968	-44.6284	0.00275055	0.743623	0.23225	Protein component of the small (40S) ribosomal subunit; nearly identical to Rps18Ap and has similarity to E. coli S13 and rat S18 ribosomal proteins
YML027W	YOX1	249.779	38.3215	0.946133	197.986	16.9862	51.7932	0.00401169	0.749947	-0.146041	197.482	22.5634	52.2976	0.00557464	0.748037	-0.162144	209.402	17.8334	40.3774	0.0177105	0.793189	-0.0488699	Homeodomain-containing transcriptional repressor, binds to Mcm1p and to early cell cycle boxes (ECBs) in the promoters of cell cycle-regulated genes expressed in M/G1 phase; expression is cell cycle-regulated; potential Cdc28p substrate
YML028W	TSA1	158.241	30.8932	0.599399	142.611	49.8434	15.63	0.509925	0.540194	-0.0274365	169.513	39.5063	-11.2716	0.565247	0.642094	0.0654726	222.739	33.0403	-64.4978	0.00305008	0.843709	0.310244	Thioredoxin peroxidase, acts as both a ribosome-associated and free cytoplasmic antioxidant; self-associates to form a high-molecular weight chaperone complex under oxidative stress; deletion results in mutator phenotype
YML030W		284.594	26.3196	1.07801	266.235	36.6334	18.3589	0.319136	1.00847	-0.0124068	236.878	23.2428	47.7163	0.00315971	0.897265	-0.139779	240.143	20.9895	44.4513	0.00329827	0.909633	-0.0497953	Putative protein of unknown function; GFP-fusion protein localizes to mitochondria; null mutant is viable and displays reduced frequency of mitochondrial genome loss
YML034W	SRC1	253.345	25.7429	0.95964	195.535	9.31862	57.8094	7.74345e-05	0.740665	-0.168114	247.59	8.75116	5.75477	0.54902	0.937841	0.014668	179.138	23.6446	74.2068	0.000107872	0.678553	-0.175526	Inner nuclear membrane protein that functions in regulation of subtelomeric genes and is linked to TREX (transcription export) factors; SRC1 produces 2 splice variant proteins with different functions; possible role in chromatid segregation
YML042W	CAT2	289.759	19.7904	1.09757	236.989	22.2443	52.7699	0.000853791	0.897687	-0.141715	250.666	21.0859	39.0934	0.00454433	0.949492	-0.106373	258.79	24.1606	30.9693	0.0275301	0.980265	0.00342526	Carnitine acetyl-CoA transferase present in both mitochondria and peroxisomes, transfers activated acetyl groups to carnitine to form acetylcarnitine which can be shuttled across membranes
YML054C	CYB2	292.669	28.5325	1.1086	216.658	17.4	76.0116	2.36413e-05	0.820673	-0.229167	238.595	40.9932	54.0745	0.0222803	0.903768	-0.162701	242.722	40.7757	49.9468	0.0305805	0.919403	-0.0672469	Cytochrome b2 (L-lactate cytochrome-c oxidoreductase), component of the mitochondrial intermembrane space, required for lactate utilization; expression is repressed by glucose and anaerobic conditions
YML063W	RPS1B	99.7169	27.6477	0.377715	88.8864	28.3052	10.8305	0.471277	0.336691	-0.0210055	131.142	44.8019	-31.4249	0.16311	0.496749	0.133387	197.348	23.716	-97.6307	7.27067e-06	0.747529	0.411362	Ribosomal protein 10 (rp10) of the small (40S) subunit; nearly identical to Rps1Ap and has similarity to rat S3a ribosomal protein
YML074C	FPR3	273.405	28.6534	1.03562	255.143	26.2963	18.2613	0.219221	0.966452	-0.0142837	269.202	46.3418	4.20311	0.84663	1.0197	0.0234328	201.257	7.32547	72.1477	1.16789e-05	0.762337	-0.159368	Nucleolar peptidyl-prolyl cis-trans isomerase (PPIase); FK506 binding protein; phosphorylated by casein kinase II (Cka1p-Cka2p-Ckb1p-Ckb2p) and dephosphorylated by Ptp1p
YML100W-A		283.763	35.2272	1.07486	289.515	23.8708	-5.75224	0.703534	1.09665	0.0787563	262.416	40.5153	21.3473	0.310899	0.993999	-0.0400162	216.676	39.6412	67.0865	0.00694617	0.820744	-0.135881	Uncharacterized
YML102W	CAC2	221.605	18.9837	0.839412	261.012	20.1021	-39.4069	0.00322876	0.988681	0.193757	239.782	38.7479	-18.1776	0.323352	0.908267	0.100752	288.694	28.1237	-67.0887	0.000897617	1.09354	0.346459	Component of the chromatin assembly complex (with Rlf2p and Msi1p) that assembles newly synthesized histones onto recently replicated DNA, required for building functional kinetochores, conserved from yeast to humans
YML103C	NUP188	241.625	17.7128	0.915248	240.069	38.9623	1.55645	0.929714	0.909352	0.0426125	287.604	27.3455	-45.9787	0.00686265	1.08941	0.208941	354.864	25.1137	-113.238	9.15641e-06	1.34418	0.52961	Subunit of the nuclear pore complex (NPC), involved in the structural organization of the complex and of the nuclear envelope, also involved in nuclear envelope permeability, interacts with Pom152p and Nic96p
YML107C		254.092	18.9862	0.96247	222.329	24.4509	31.7625	0.0250802	0.842157	-0.0693017	225.418	57.2078	28.6735	0.282738	0.853858	-0.0720379	131.773	32.4288	122.319	5.4899e-05	0.499141	-0.357457	Protein required for nuclear retention of unspliced pre-mRNAs along with Mlp1p and Pml1p; anchored to nuclear pore complex via Mlp1p and Mlp2p; found with the subset of nuclear pores farthest from the nucleolus; may interact with ribosomes
YML119W		280.685	20.5227	1.0632	270.959	27.7172	9.72564	0.481584	1.02636	0.0195101	295.121	21.8482	-14.4359	0.227007	1.11788	0.095083	329.207	19.9426	-48.5219	0.000795001	1.247	0.300747	Uncharacterized
YML128C	MSC1	212.764	43.3737	0.805926	138.214	25.3958	74.5503	0.000684587	0.523538	-0.239674	180.652	17.3959	32.1119	0.0582763	0.68429	-0.0910109	149.381	33.7882	63.3831	0.00633301	0.565838	-0.151436	Protein of unknown function; mutant is defective in directing meiotic recombination events to homologous chromatids; the authentic, non-tagged protein is detected in highly purified mitochondria and is phosphorylated
YMR030W	RSF1	297.317	42.4925	1.1262	260.921	5.24866	36.396	0.033583	0.988336	-0.0781749	264.123	38.897	33.1933	0.145741	1.00047	-0.0829367	231.827	6.89969	65.4894	0.00156443	0.878133	-0.124184	Protein required for respiratory growth; localized to both the nucleus and mitochondrion; may interact with transcription factors to mediate the transition to respiratory growth and activate transcription of nuclear and mitochondrial genes
YMR075W	RCO1	233.678	41.1563	0.885143	240.24	14.1367	-6.56267	0.653038	0.910001	0.0717712	229.213	17.5753	4.46433	0.768583	0.868233	0.0167251	160.542	16.1753	73.1356	0.000254757	0.608114	-0.179663	Essential subunit of the histone deacetylase Rpd3S complex; interacts with Eaf3p
YMR078C	CTF18	202.606	15.6412	0.767448	147.21	25.5638	55.3966	0.00171961	0.557613	-0.169161	183.583	20.437	19.0237	0.0858148	0.695389	-0.0428965	189.448	28.7743	13.1588	0.34	0.717604	0.0345753	Subunit of a complex with Ctf8p that shares some subunits with Replication Factor C and is required for sister chromatid cohesion; may have overlapping functions with Rad24p in the DNA damage replication checkpoint
YMR080C	NAM7	246.59	27.7316	0.934052	252.082	34.9991	-5.4919	0.750898	0.954855	0.0703074	251.715	30.7866	-5.12554	0.745115	0.953467	0.0549089	300.857	19.3189	-54.2669	0.000449345	1.13961	0.308302	ATP-dependent RNA helicase of the SFI superfamily involved in nonsense mediated mRNA decay; required for efficient translation termination at nonsense codons and targeting of NMD substrates to P-bodies; involved in telomere maintenance
YMR092C	AIP1	250.866	20.9481	0.950251	206.289	17.2548	44.5776	0.000696687	0.781396	-0.118491	221.188	39.6627	29.6781	0.136968	0.837833	-0.0763077	177.177	45.4249	73.6897	0.00868672	0.671123	-0.1746	Actin cortical patch component, interacts with the actin depolymerizing factor cofilin; required to restrict cofilin localization to cortical patches; contains WD repeats
YMR123W	PKR1	226.614	32.2129	0.858386	167.169	36.8996	59.4451	0.00952623	0.633216	-0.179676	218.368	41.618	8.24597	0.691307	0.827152	0.00138397	170.024	21.7878	56.5898	0.00135996	0.644031	-0.119933	V-ATPase assembly factor, functions with other V-ATPase assembly factors in the ER to efficiently assemble the V-ATPase membrane sector (V0)
YMR137C	PSO2	251.792	18.1227	0.953756	207.462	19.742	44.3297	0.00127483	0.78584	-0.117367	208.669	10.5289	43.123	6.25134e-05	0.790411	-0.127102	220.962	19.6521	30.8295	0.0115573	0.836978	-0.0118652	Required for a post-incision step in the repair of DNA single and double-strand breaks that result from interstrand crosslinks produced by a variety of mono- and bi-functional psoralen derivatives; induced by UV-irradiation
YMR139W	RIM11	258.227	19.7243	0.978131	201.451	16.4563	56.7759	4.20089e-05	0.763071	-0.163219	207.948	11.794	50.2784	1.71729e-05	0.787683	-0.15328	211.913	23.7584	46.3136	0.00295248	0.802701	-0.0678359	Protein kinase required for signal transduction during entry into meiosis; promotes the formation of the Ime1p-Ume6p complex by phosphorylating Ime1p and Ume6p; shares similarity with mammalian glycogen synthase kinase 3-beta
YMR165C	SMP2	239.365	40.8899	0.906684	220.417	45.1132	18.9474	0.419833	0.834914	-0.0237161	241.055	28.3877	-1.6901	0.923888	0.913086	0.0408559	174.448	33.7756	64.9162	0.00475618	0.66079	-0.146159	Mg<sup>2+</sup>-dependent phosphatidate (PA) phosphatase, catalyzes the dephosphorylation of PA to yield diacylglycerol and P<sub>i</sub>, responsible for de novo lipid synthesis; homologous to mammalian lipin 1
YMR166C		259.719	36.291	0.983782	228.607	27.569	31.1116	0.0828848	0.865935	-0.0657064	202.623	29.6814	57.0953	0.00576486	0.767512	-0.178886	221.005	15.5392	38.714	0.0155039	0.837138	-0.0384277	Uncharacterized
YMR171C		307.017	29.8756	1.16294	254.27	19.1077	52.7471	0.00110013	0.963142	-0.138164	310.488	17.5835	-3.47156	0.781824	1.17609	0.0573416	304.153	31.5785	2.86363	0.863828	1.15209	0.117076	Specificity factor required for Rsp5p-dependent ubiquitination and sorting of specific cargo proteins at the multivesicular body; mRNA is targeted to the bud via the mRNA transport system involving She2p
YMR174C	PAI3	258.313	17.7698	0.978458	203.334	20.2031	54.9787	0.000311302	0.770206	-0.156394	235.718	30.099	22.5953	0.139584	0.89287	-0.048407	205.976	28.7134	52.3372	0.00451078	0.780211	-0.0906167	Cytoplasmic proteinase A (Pep4p) inhibitor, dependent on Pbs2p and Hog1p protein kinases for osmotic induction; intrinsically unstructured, N-terminal half becomes ordered in the active site of proteinase A upon contact
YMR179W	SPT21	192.745	46.8554	0.730094	198.013	29.3417	-5.26802	0.786239	0.750049	0.0586496	200.171	10.5727	-7.42619	0.64029	0.758224	0.0558731	286.978	29.7839	-94.2335	0.000233183	1.08704	0.437255	Protein required for normal transcription at several loci including HTA2-HTB2 and HHF2-HHT2, but not required at the other histone loci; functionally related to Spt10p; involved in telomere maintenance
YMR181C		262.018	22.521	0.992492	203.531	17.8652	58.4864	7.55376e-05	0.770952	-0.168937	242.477	23.9216	19.541	0.136595	0.918473	-0.0363043	255.897	28.936	6.12091	0.668107	0.969307	0.0859889	Uncharacterized
YMR205C	PFK2	199.971	35.199	0.757465	149.511	22.0882	50.4602	0.00341185	0.566328	-0.150991	189.11	30.3652	10.8611	0.526765	0.716324	-0.0123569	214.492	22.9135	-14.5216	0.335098	0.812471	0.138327	Beta subunit of heterooctameric phosphofructokinase involved in glycolysis, indispensable for anaerobic growth, activated by fructose-2,6-bisphosphate and AMP, mutation inhibits glucose induction of cell cycle-related genes
YMR214W	SCJ1	272.912	25.4962	1.03376	224.68	27.6906	48.2318	0.00646116	0.851061	-0.127907	243.751	21.4223	29.1613	0.033842	0.923298	-0.0711768	243.833	9.42319	29.0786	0.00991974	0.923611	0.00356707	One of several homologs of bacterial chaperone DnaJ, located in the ER lumen where it cooperates with Kar2p to mediate maturation of proteins
YMR216C	SKY1	224.811	35.753	0.851558	152.817	33.4533	71.9948	0.00204793	0.578851	-0.227575	162.248	32.1011	62.5634	0.00429242	0.614576	-0.204623	175.38	37.1998	49.4312	0.0272717	0.664319	-0.0935678	SR protein kinase (SRPK) involved in regulating proteins involved in mRNA metabolism and cation homeostasis; similar to human SRPK1
YMR222C	FSH2	272.08	39.4286	1.03061	261.974	26.7276	10.106	0.551918	0.992327	0.016342	251.311	27.9771	20.7692	0.240436	0.951936	-0.0395081	182.321	26.6609	89.7597	9.77893e-05	0.690609	-0.226632	Putative serine hydrolase that localizes to the cytoplasm; sequence is similar to S. cerevisiae Fsh1p and Fsh3p and the human candidate tumor suppressor OVCA2
YMR230W	RPS10B	150.247	45.984	0.569116	164.101	17.5539	-13.854	0.408775	0.621594	0.0826405	168.478	27.3399	-18.2315	0.336841	0.638175	0.0906851	217.776	25.6752	-67.5291	0.00208473	0.824908	0.318395	Protein component of the small (40S) ribosomal subunit; nearly identical to Rps10Ap and has similarity to rat ribosomal protein S10
YMR263W	SAP30	223.531	19.8038	0.846708	205.369	28.7484	18.1624	0.209777	0.777911	-0.0239216	218.1	12.6699	5.43081	0.514721	0.826137	0.0116037	331.68	53.2669	-108.149	0.00329507	1.25636	0.502792	Subunit of a histone deacetylase complex, along with Rpd3p and Sin3p, that is involved in silencing at telomeres, rDNA, and silent mating-type loci; involved in telomere maintenance
YMR269W		84.8563	14.0551	0.321425	91.4638	6.13446	-6.60744	0.21742	0.346454	0.0420637	68.9173	16.8418	15.939	0.0828154	0.26105	-0.048161	170.995	10.1349	-86.1384	1.99221e-09	0.647707	0.361639	Nucleolar protein of unknown function implicated in ribosome biogenesis; TMA23 may be a fungal-specific gene as no homologs have been yet identified in higher eukaryotes
YMR272C	SCS7	263.432	25.254	0.997847	203.504	9.86147	59.9279	1.66412e-05	0.770847	-0.174114	216.874	20.4896	46.5576	0.00155372	0.821492	-0.138436	236.517	58.4234	26.9142	0.324848	0.895899	0.00781536	Sphingolipid alpha-hydroxylase, functions in the alpha-hydroxylation of sphingolipid-associated very long chain fatty acids, has both cytochrome b5-like and hydroxylase/desaturase domains, not essential for growth
YMR275C	BUL1	187.911	42.1961	0.711783	158.337	48.386	29.5735	0.244503	0.599763	-0.0742961	202.064	9.12385	-14.1537	0.330245	0.765396	0.0806601	256.768	35.1018	-68.857	0.00410452	0.972605	0.339118	Ubiquitin-binding component of the Rsp5p E3-ubiquitin ligase complex, functional homolog of Bul2p, disruption causes temperature-sensitive growth, overexpression causes missorting of amino acid permeases
YMR312W	ELP6	139.302	23.0665	0.527661	155.814	15.0585	-16.5118	0.105758	0.590206	0.0905107	156.982	15.6969	-17.6791	0.0906446	0.594627	0.0870175	213.746	14.8331	-74.4436	1.82791e-06	0.809644	0.340026	Subunit of Elongator complex, which is required for modification of wobble nucleosides in tRNA; required for Elongator structural integrity
YNL021W	HDA1	193.132	19.4787	0.731562	247.418	30.862	-54.2851	0.00544601	0.937188	0.244398	275.23	34.0523	-82.0971	0.00100647	1.04254	0.338773	300.819	54.2869	-107.686	0.00373253	1.13947	0.488375	Putative catalytic subunit of a class II histone deacetylase complex that also contains Hda2p and Hda3p; Hda1p interacts with the Hda2p-Hda3p subcomplex to form an active tetramer; deletion increases histone H2B, H3 and H4 acetylation
YNL029C	KTR5	283.161	36.8397	1.07258	234.024	12.3414	49.1372	0.00224584	0.886455	-0.129279	237.567	12.4026	45.594	0.00373963	0.899876	-0.131946	224.944	26.1198	58.2169	0.00260527	0.852062	-0.102535	Putative mannosyltransferase involved in protein glycosylation; member of the KRE2/MNT1 mannosyltransferase family
YNL030W	HHF2	271.227	19.9037	1.02738	216.659	10.1481	54.5683	4.61068e-06	0.820678	-0.152247	263.881	28.5002	7.34598	0.593909	0.999551	0.0112146	248.225	29.2304	23.0025	0.127405	0.940246	0.0258809	Histone H4, core histone protein required for chromatin assembly and chromosome function; one of two identical histone proteins (see also HHF1); contributes to telomeric silencing; N-terminal domain involved in maintaining genomic integrity
YNL040W		259.278	37.8562	0.982115	206.178	4.72651	53.1007	0.0015653	0.780976	-0.149087	224.625	13.5306	34.6538	0.0217317	0.850851	-0.0939438	213.823	30.2429	45.4554	0.0206925	0.809936	-0.0641469	Uncharacterized
YNL041C	COG6	258.789	46.7983	0.980263	207.52	19.693	51.2698	0.00936839	0.786059	-0.14225	205.432	21.9306	53.3576	0.00835	0.778151	-0.164862	212.605	13.7369	46.1845	0.0135703	0.805322	-0.0671124	Component of the conserved oligomeric Golgi complex (Cog1p through Cog8p), a cytosolic tethering complex that functions in protein trafficking to mediate fusion of transport vesicles to Golgi compartments
YNL044W	YIP3	263.059	28.3124	0.996437	215.596	17.4639	47.4638	0.000995453	0.81665	-0.126976	238.162	17.3731	24.897	0.0469095	0.90213	-0.0564422	204.909	36.1688	58.1508	0.00870159	0.776169	-0.11066	Protein localized to COPII vesicles, proposed to be involved in ER to Golgi transport; interacts with members of the Rab GTPase family and Yip1p; also interacts with Rtn1p
YNL045W		264.482	25.4319	1.00183	198.953	39.7531	65.5285	0.00757808	0.753612	-0.195117	261.851	23.9225	2.63084	0.838998	0.99186	0.0281041	221.772	21.0344	42.7098	0.00330254	0.840046	-0.0515787	Leucyl aminopeptidase yscIV (leukotriene A4 hydrolase) with epoxide hydrolase activity, metalloenzyme containing one zinc atom; green fluorescent protein (GFP)-fusion protein localizes to the cytoplasm and nucleus
YNL047C	SLM2	266.974	40.1245	1.01126	232.218	31.8258	34.7552	0.0784959	0.879615	-0.0780515	203.584	10.5232	63.3892	0.000629357	0.771153	-0.201683	187.799	32.8875	79.1743	0.000980614	0.711361	-0.188664	Phosphoinositide PI4,5P(2) binding protein, forms a complex with Slm1p; acts downstream of Mss4p in a pathway regulating actin cytoskeleton organization in response to stress; phosphorylated by the TORC2 complex
YNL050C		247.629	21.4004	0.93799	202.66	11.4998	44.969	8.54339e-05	0.767652	-0.120624	229.102	11.3571	18.5271	0.0405108	0.867811	-0.0345348	222.347	18.2836	25.2827	0.0273429	0.842222	0.00741116	Uncharacterized
YNL058C		254.643	27.1397	0.964559	169.026	34.8671	85.6176	0.000680354	0.64025	-0.273187	215.671	28.4408	38.9727	0.0218846	0.816935	-0.110971	185.257	19.385	69.3868	4.31576e-05	0.70173	-0.156728	Uncharacterized
YNL066W	SUN4	266.136	15.3712	1.00809	238.081	18.733	28.0545	0.0133045	0.901823	-0.0528381	257.786	21.8117	8.34971	0.439077	0.976462	0.0066797	195.936	23.0193	70.1996	0.000179454	0.742182	-0.155018	Cell wall protein related to glucanases, possibly involved in cell wall septation; member of the SUN family
YNL070W	TOM7	271.561	25.0628	1.02864	221.504	26.6388	50.0576	0.0038869	0.839029	-0.135094	236.531	16.8019	35.0297	0.00497037	0.895953	-0.0935998	228.214	27.3908	43.3471	0.0102397	0.864447	-0.0510431	Component of the TOM (translocase of outer membrane) complex responsible for recognition and initial import steps for all mitochondrially directed proteins; promotes assembly and stability of the TOM complex
YNL080C		114.238	27.4882	0.432719	72.6433	34.0024	41.5944	0.0319256	0.275164	-0.13462	82.6965	49.5792	31.5412	0.195981	0.313244	-0.103031	174.912	36.0318	-60.6742	0.00676802	0.662545	0.277426	Protein involved in N-glycosylation; deletion mutation confers sensitivity to exidative stress and shows synthetic lethality with mutations in the spindle checkpoint genes BUB3 and MAD1; YNL080C is not an essential gene
YNL085W	MKT1	247.866	28.1334	0.938887	185.97	17.9778	61.8965	0.000102834	0.704431	-0.184695	215.19	27.0904	32.6759	0.0418656	0.815115	-0.0880947	190.219	27.8189	57.6472	0.0021911	0.720527	-0.115083	Protein that forms a complex with Pbp1p that may mediate posttranscriptional regulation of HO endonuclease; involved in propagation of M2 dsRNA satellite of L-A virus; contains a DTG signature typical of retroviral proteases
YNL091W	NST1	225.046	37.0399	0.852447	205.187	9.04568	19.859	0.134983	0.777223	-0.0300437	209.448	21.3656	15.5979	0.303566	0.793364	-0.0266899	163.002	27.8722	62.0444	0.00219219	0.61743	-0.141247	Protein of unknown function, mediates sensitivity to salt stress; interacts physically with the splicing factor Msl1p and also displays genetic interaction with MSL1
YNL097C	PHO23	250.974	31.3124	0.950659	236.023	14.3407	14.9507	0.215559	0.894027	-0.00624638	232.071	23.7063	18.9026	0.195313	0.879058	-0.0354758	335.68	53.6191	-84.7062	0.00945333	1.27152	0.425429	Probable component of the Rpd3 histone deacetylase complex, involved in transcriptional regulation of PHO5; C-terminus has similarity to human candidate tumor suppressor p33(ING1) and its isoform ING3
YNL098C	RAS2	292.644	13.9283	1.1085	230.924	32.8992	61.7195	0.00448169	0.874713	-0.175036	241.939	49.6979	50.7053	0.0542121	0.916434	-0.149943	270.409	38.7852	22.2347	0.2275	1.02428	0.0377124	GTP-binding protein that regulates the nitrogen starvation response, sporulation, and filamentous growth; farnesylation and palmitoylation required for activity and localization to plasma membrane; homolog of mammalian Ras proto-oncogenes
YNL100W		245.669	33.8884	0.930566	187.546	16.3145	58.123	0.000435657	0.710403	-0.170843	212.645	24.0373	33.0242	0.0400679	0.805474	-0.0897303	219.87	16.1528	25.7991	0.060126	0.832842	0.00463838	Putative protein of unknown function; non-tagged protein is detected in purified mitochondria; null mutant is viable and displays reduced respiratory growth and reduced frequency of mitochondrial genome los
YNL136W	EAF7	280.369	36.8185	1.062	232.097	26.2386	48.2723	0.00900459	0.879154	-0.126563	257.985	11.2875	22.3844	0.100118	0.977214	-0.0444334	148.602	30.1738	131.767	4.07226e-06	0.562885	-0.382298	Subunit of the NuA4 histone acetyltransferase complex, which acetylates the N-terminal tails of histones H4 and H2A
YNL141W	AAH1	143.434	37.3123	0.543312	160.853	23.2014	-17.4184	0.269035	0.609291	0.0947742	177.341	31.6592	-33.907	0.0763261	0.671748	0.149081	232.882	38.2677	-89.448	0.000919564	0.882131	0.398583	Adenine deaminase (adenine aminohydrolase), converts adenine to hypoxanthine; involved in purine salvage; transcriptionally regulated by nutrient levels and growth phase; Aah1p degraded upon entry into quiescence via SCF and the proteasome
YNL154C	YCK2	255.54	35.5965	0.967955	235.045	11.3008	20.4949	0.118546	0.890323	-0.0263304	207.99	16.8673	47.5504	0.00301153	0.78784	-0.143333	229.08	22.65	26.4598	0.0909819	0.867728	0.00624859	Palmitoylated plasma membrane-bound casein kinase I isoform; shares redundant functions with Yck1p in morphogenesis, proper septin assembly, endocytic trafficking; provides an essential function overlapping with that of Yck1p
YNL159C	ASI2	263.635	27.0634	0.998616	213.575	25.1663	50.0598	0.00309166	0.808995	-0.136694	241.221	18.2647	22.4133	0.0688692	0.913717	-0.0469514	220.531	32.039	43.1037	0.0216456	0.835344	-0.053424	Integral inner nuclear membrane protein that acts with Asi1p and Asi3p to ensure the fidelity of SPS-sensor signalling by maintaining the dormant repressed state of gene expression in the absence of inducing signals
YNL169C	PSD1	226.666	24.532	0.858584	156.016	18.8268	70.6501	2.16028e-05	0.59097	-0.222109	213.293	30.1481	13.3734	0.382024	0.807927	-0.0180308	196.496	26.4939	30.1703	0.0468421	0.744302	-0.0198373	Phosphatidylserine decarboxylase of the mitochondrial inner membrane, converts phosphatidylserine to phosphatidylethanolamine
YNL201C	PSY2	250.31	23.4803	0.948144	288.065	26.7375	-37.7547	0.0177071	1.09115	0.193262	300.23	33.3454	-49.9199	0.0122055	1.13724	0.22512	310.412	26.359	-60.1018	0.00107289	1.1758	0.331954	Putative subunit of an evolutionarily conserved protein phosphatase complex containing the catalytic subunit Pph3p and the regulatory subunit Psy4p; required for cisplatin and oxaliplatin resistance; putative homolog of mammalian R3
YNL204C	SPS18	282.722	20.4684	1.07092	217.141	26.0172	65.5819	0.000564225	0.822502	-0.191658	211.579	39.7409	71.1438	0.00523893	0.801434	-0.228789	199.026	46.3443	83.6967	0.00530107	0.753885	-0.199232	Protein of unknown function, contains a putative zinc-binding domain; expressed during sporulation
YNL206C	RTT106	181.748	29.8834	0.688439	160.052	34.6339	21.6957	0.232607	0.606258	-0.0456936	199.863	15.9662	-18.1156	0.136998	0.757058	0.0947803	260.496	42.4835	-78.7479	0.00400506	0.986726	0.374016	Protein with a role in regulation of Ty1 transposition
YNL215W	IES2	157.889	32.5434	0.598065	176.357	24.0673	-18.4683	0.21655	0.66802	0.101653	158.62	26.8472	-0.730808	0.962008	0.600833	0.0254947	290.204	41.8904	-132.315	0.000115436	1.09926	0.56698	Protein that associates with the INO80 chromatin remodeling complex under low-salt conditions; essential for growth under anaerobic conditions
YNL217W		258.858	35.7042	0.980524	297.626	35.4756	-38.7673	0.0591024	1.12737	0.198814	313.521	22.334	-54.6627	0.00210469	1.18758	0.244315	313.742	39.8425	-54.8837	0.0202178	1.18842	0.31575	Uncharacterized
YNL219C	ALG9	249.74	30.2544	0.945986	199.72	19.1956	50.0207	0.00122556	0.756513	-0.139335	226.01	34.4918	23.7304	0.194913	0.856098	-0.0539404	247.531	59.1394	2.20911	0.934732	0.937618	0.0956906	Mannosyltransferase, involved in N-linked glycosylation; catalyzes the transfer of mannose from Dol-P-Man to lipid-linked oligosaccharides; mutation of the human ortholog causes type 1 congenital disorders of glycosylation
YNL227C	JJJ1	94.8798	38.397	0.359393	52.2158	19.5367	42.664	0.0109532	0.197787	-0.142558	74.5282	15.3181	20.3516	0.160446	0.282304	-0.0634326	145.705	26.6297	-50.8254	0.00780954	0.551913	0.232054	Co-chaperone that stimulates the ATPase activity of Ssa1p, required for a late step of ribosome biogenesis; associated with the cytosolic large ribosomal subunit; contains a J-domain; mutation causes defects in fluid-phase endocytosis
YNL233W	BNI4	249.953	35.8784	0.94679	263.365	38.2677	-13.4124	0.50293	0.997595	0.100984	299.996	20.8925	-50.0439	0.00335979	1.13635	0.225538	288.817	54.6899	-38.8644	0.161109	1.094	0.251361	Targeting subunit for Glc7p protein phosphatase, localized to the bud neck, required for localization of chitin synthase III to the bud neck via interaction with the chitin synthase III regulatory subunit Skt5p
YNL236W	SIN4	134.95	24.5247	0.511174	88.2415	19.9591	46.7085	0.00123736	0.334248	-0.149834	60.9183	45.2314	74.0317	0.008095	0.230751	-0.260999	203.648	52.067	-68.6979	0.141967	0.771394	0.316448	Subunit of the RNA polymerase II mediator complex; associates with core polymerase subunits to form the RNA polymerase II holoenzyme; contributes to both postive and negative transcriptional regulation; dispensible for basal transcription
YNL237W	YTP1	270.041	36.5722	1.02288	215.79	25.5039	54.2511	0.0049276	0.817386	-0.151284	256.524	27.3407	13.5167	0.428535	0.971683	-0.0123301	246.736	37.7342	23.3047	0.261367	0.934607	0.0242416	Probable type-III integral membrane protein of unknown function, has regions of similarity to mitochondrial electron transport proteins
YNL238W	KEX2	307.668	40.2604	1.16541	207.327	55.1465	100.34	0.00441834	0.785331	-0.318311	254.816	25.296	52.8517	0.00616793	0.965213	-0.15591	217.008	34.4366	90.6594	0.000442628	0.822001	-0.215212	Subtilisin-like protease (proprotein convertase), a calcium-dependent serine protease involved in the activation of proproteins of the secretory pathway
YNL241C	ZWF1	140.829	60.78	0.533444	160.514	25.1518	-19.6847	0.382821	0.608008	0.102836	135.206	21.4425	5.62353	0.794489	0.512143	-0.00103037	247.583	27.8958	-106.754	0.000328658	0.937815	0.46305	Glucose-6-phosphate dehydrogenase (G6PD), catalyzes the first step of the pentose phosphate pathway; involved in adapting to oxidatve stress; homolog of the human G6PD which is deficient in patients with hemolytic anemia
YNL242W	ATG2	226.469	54.4987	0.857835	153.717	40.3474	72.752	0.0091501	0.58226	-0.230111	190.94	13.6027	35.5287	0.076122	0.723257	-0.101981	290.607	61.945	-64.1385	0.0637286	1.10078	0.337311	Peripheral membrane protein required for vesicle formation during autophagy, pexophagy, and the cytoplasm-to-vaucole targeting (Cvt) pathway; involved in Atg9p cycling between the phagophore assembly site and mitochondria
YNL281W	HCH1	226.388	49.0565	0.85753	155.252	20.8563	71.136	0.00143552	0.588076	-0.224005	196.476	36.1231	29.9118	0.185307	0.744228	-0.0807161	232.439	37.1906	-6.05064	0.784821	0.880449	0.117247	Heat shock protein regulator that binds to Hsp90p and may stimulate ATPase activity; originally identified as a high-copy number suppressor of a HSP90 loss-of-function mutation; GFP-fusion protein localizes to the cytoplasm and nucleus
YNL292W	PUS4	277.043	39.6241	1.04941	222.353	17.507	54.6904	0.00216596	0.842246	-0.151542	233.518	22.0107	43.5254	0.0135718	0.884538	-0.124992	225.024	53.0904	52.0196	0.0697771	0.852363	-0.0816094	Pseudouridine synthase, catalyzes only the formation of pseudouridine-55 (Psi55), a highly conserved tRNA modification, in mitochondrial and cytoplasmic tRNAs; PUS4 overexpression leads to translational derepression of GCN4 (Gcd- phenotype)
YNL302C	RPS19B	105.998	24.4326	0.401507	71.3401	21.8005	34.6577	0.0126694	0.270228	-0.109999	62.8872	15.4444	43.1105	0.000714	0.238209	-0.14804	158.627	57.2526	-52.6295	0.075532	0.600861	0.24352	Protein component of the small (40S) ribosomal subunit, required for assembly and maturation of pre-40 S particles; mutations in human RPS19 are associated with Diamond Blackfan anemia; nearly identical to Rps19Ap
YNL305C		239.775	19.5692	0.908239	169.326	37.6448	70.4495	0.00416817	0.641385	-0.218718	246.139	6.38325	-6.3636	0.385601	0.932343	0.0586176	188.97	59.291	50.8055	0.0912761	0.715794	-0.0925387	Uncharacterized
YNL321W		249.057	50.7656	0.943399	185.558	17.2473	63.4991	0.0035009	0.702872	-0.190527	226.105	24.4977	22.9523	0.245526	0.856459	-0.0510913	194.637	22.2886	54.4205	0.0110963	0.737261	-0.102365	Low affinity vacuolar membrane localized monovalent cation/H+ antiporter; member of the calcium exchanger (CAX) family; potential Cdc28p substrate
YNL329C	PEX6	224.946	28.4244	0.852066	252.628	52.548	-27.6825	0.27391	0.956924	0.150018	243.668	37.5267	-18.722	0.320988	0.922983	0.103295	272.128	28.1002	-47.1822	0.00811944	1.03079	0.272448	AAA-peroxin that heterodimerizes with AAA-peroxin Pex1p and participates in the recycling of peroxisomal signal receptor Pex5p from the peroxisomal membrane to the cystosol
YNL333W	SNZ2	277.25	18.6928	1.05019	200.09	25.9787	77.1592	0.000193327	0.757918	-0.23661	209.72	17.3572	67.5294	1.49473e-05	0.794395	-0.215886	189.791	21.4534	87.4586	1.1671e-05	0.718905	-0.215762	Member of a stationary phase-induced gene family; transcription of SNZ2 is induced prior to diauxic shift, and also in the absence of thiamin in a Thi2p-dependent manner; forms a coregulated gene pair with SNO2; interacts with Thi11p
YNL339C	YRF1-6	272.384	19.8728	1.03176	319.295	26.5629	-46.9108	0.00531388	1.20945	0.232375	325.095	22.1666	-52.7106	0.000841612	1.23142	0.238868	293.916	30.9779	-21.5321	0.171107	1.11332	0.195054	Helicase encoded by the Y' element of subtelomeric regions, highly expressed in the mutants lacking the telomerase component TLC1; potentially phosphorylated by Cdc28p
YNR006W	VPS27	145.825	41.5906	0.552366	160.292	23.4444	-14.4678	0.3888	0.607168	0.0840775	194.353	32.8377	-48.5281	0.0230163	0.736185	0.204809	238.153	43.459	-92.3279	0.00177631	0.902093	0.410487	Endosomal protein that forms a complex with Hse1p; required for recycling Golgi proteins, forming lumenal membranes and sorting ubiquitinated proteins destined for degradation; has Ubiquitin Interaction Motifs which bind ubiquitin (Ubi4p)
YNR025C	YNR025C	273.582	34.6472	1.0363	221.282	27.6301	52.3003	0.0056638	0.83819	-0.143184	248.868	29.377	24.7145	0.153778	0.942681	-0.0542364	225.155	40.6798	48.4277	0.0368626	0.852858	-0.0694457	Dubious open reading frame unlikely to encode a functional protein, based on available experimental and comparative sequence data; deletion reduces expression of PIS1 gene encoding phosphatidylinositol synthase
YNR027W	BUD17	268.378	15.8242	1.01658	215.751	20.3856	52.6266	0.000485462	0.81724	-0.145464	259.136	25.242	9.24233	0.444918	0.981575	0.00362134	227.958	19.9821	40.42	0.00235461	0.863477	-0.0412819	Putative pyridoxal kinase, a key enzyme in vitamin B6 metabolism; involved in bud-site selection; diploid mutants display a random rather than a bipolar budding pattern; similarity to yeast BUD16 and human pyridoxal kinase (PDXK)
YNR028W	CPR8	262.831	26.3858	0.995573	201.33	25.2815	61.5013	0.000811534	0.762613	-0.180194	255.569	34.2911	7.26208	0.670994	0.968065	0.0103239	212.815	11.797	50.0167	0.000330581	0.806116	-0.0799443	Peptidyl-prolyl cis-trans isomerase (cyclophilin), catalyzes the cis-trans isomerization of peptide bonds N-terminal to proline residues; similarity to Cpr4p suggests a potential role in the secretory pathway
YNR034W	SOL1	261.4	37.2258	0.990152	210.118	31.8062	51.282	0.0126331	0.795902	-0.141772	212.352	15.1016	49.0486	0.00275906	0.804362	-0.148164	214.717	19.7003	46.6837	0.00557871	0.81332	-0.0679153	Protein with a possible role in tRNA export; shows similarity to 6-phosphogluconolactonase non-catalytic domains but does not exhibit this enzymatic activity; homologous to Sol2p, Sol3p, and Sol4p
YNR051C	BRE5	230.375	23.2593	0.872632	112.5	8.83221	117.875	3.61824e-09	0.426135	-0.400248	216.145	12.425	14.2296	0.133683	0.818732	-0.0207401	110.841	32.639	119.534	4.67432e-05	0.419853	-0.35679	Ubiquitin protease cofactor, forms deubiquitination complex with Ubp3p that coregulates anterograde and retrograde transport between the endoplasmic reticulum and Golgi compartments; null is sensitive to brefeldin A
YNR055C	HOL1	275.016	22.383	1.04173	207.07	18.3785	67.9463	2.20209e-05	0.784355	-0.202161	219.226	19.2358	55.7896	0.000194585	0.830403	-0.171739	233.021	27.5563	41.9955	0.011618	0.882654	-0.0444837	Putative transporter in the major facilitator superfamily (DHA1 family) of multidrug resistance transporters; mutations in membrane-spanning domains permit cation and histidinol uptake
YNR062C		257.52	22.0041	0.975453	212.44	17.0739	45.0797	0.000534945	0.804696	-0.119057	235.334	18.8922	22.1855	0.0539509	0.891417	-0.0469688	193.643	14.3029	63.8762	6.40067e-06	0.733497	-0.134656	Uncharacterized
YNR066C		265.014	17.8592	1.00384	203.027	15.2257	61.9874	1.06108e-05	0.76904	-0.181597	223.114	16.4035	41.9004	0.000596332	0.845128	-0.120568	205.847	12.2686	59.1666	3.96457e-06	0.779725	-0.113693	Uncharacterized
YNR075W	COS10	253.056	33.691	0.958545	203.644	28.9009	49.4114	0.00902414	0.771381	-0.136361	222.334	13.8126	30.7219	0.0243459	0.842174	-0.079946	194.156	13.1708	58.8999	0.00029257	0.735439	-0.117666	Protein of unknown function, member of the DUP380 subfamily of conserved, often subtelomerically-encoded proteins
YOL004W	SIN3	192.895	22.4795	0.730663	93.4193	18.2866	99.4758	5.58915e-07	0.353861	-0.338077	108.347	14.3074	84.548	6.84994e-07	0.410405	-0.292492	223.38	29.0164	-30.4849	0.0579514	0.846136	0.195846	Component of the Sin3p-Rpd3p histone deacetylase complex, involved in transcriptional repression and activation of diverse processes, including mating-type switching and meiosis; involved in the maintenance of chromosomal integrity
YOL009C	MDM12	24.0493	13.6464	0.091096	39.2876	6.12522	-15.2383	0.00896652	0.148817	0.0625489	45.9508	20.0237	-21.9015	0.0459246	0.174056	0.0864218	80.8419	33.3704	-56.7926	0.00728284	0.306219	0.225144	Mitochondrial outer membrane protein, required for transmission of mitochondria to daughter cells; component of the Mdm10-Mdm12-Mmm1 complex involved in import and assembly of outer membrane beta-barrel proteins
YOL012C	HTZ1	215.483	32.4341	0.816222	150.073	24.8245	65.4094	0.000564935	0.56846	-0.204503	185.848	11.7223	29.635	0.022074	0.703969	-0.0812372	166.133	18.7752	49.3494	0.00175319	0.629293	-0.0971451	Histone variant H2AZ, exchanged for histone H2A in nucleosomes by the SWR1 complex; involved in transcriptional regulation through prevention of the spread of silent heterochromatin
YOL032W	OPI10	300.142	22.5937	1.1369	291.491	23.2636	8.65095	0.482725	1.10413	0.0274871	298.343	37.3958	1.79923	0.917893	1.13009	0.036387	228.658	24.1955	71.4845	0.000154367	0.866127	-0.145715	Protein with a possible role in phospholipid biosynthesis, based on inositol-excreting phenotype of the null mutant and its suppression by exogenous choline
YOL036W		265.443	17.6848	1.00547	213.454	19.9121	51.9894	0.000424662	0.808537	-0.14364	218.716	38.7846	46.7269	0.030484	0.82847	-0.138788	231.425	14.7775	34.0179	0.00161467	0.876611	-0.0182543	Uncharacterized
YOL041C	NOP12	172.741	31.9179	0.654321	162.373	20.741	10.3679	0.444604	0.615049	-0.00459317	183.92	28.0572	-11.179	0.47829	0.696666	0.0672089	220.167	15.2513	-47.4262	0.00139029	0.833966	0.25162	Nucleolar protein involved in pre-25S rRNA processing and biogenesis of large 60S ribosomal subunit; contains an RNA recognition motif (RRM); binds to Ebp2; similar to Nop13p and Nsr1p
YOL064C	MET22	241.993	25.4312	0.916641	270.395	16.5581	-28.4021	0.0212047	1.02422	0.156166	230.529	9.18827	11.4642	0.242465	0.873216	-0.00859258	288.461	13.5969	-46.4678	0.000550648	1.09266	0.276845	Bisphosphate-3'-nucleotidase, involved in salt tolerance and methionine biogenesis; dephosphorylates 3'-phosphoadenosine-5'-phosphate and 3'-phosphoadenosine-5'-phosphosulfate, intermediates of the sulfate assimilation pathway
YOL071W	EMI5	280.177	29.3877	1.06128	250.424	33.2059	29.7536	0.101531	0.948574	-0.0564552	268.496	37.5267	11.6812	0.531301	1.01703	-0.00391826	215.138	39.8809	65.0387	0.00798548	0.814918	-0.129618	Non-essential protein of unknown function required for transcriptional induction of the early meiotic-specific transcription factor IME1, also required for sporulation; null mutant excretes excess acetic acid
YOL073C		291.211	24.9512	1.10307	257.838	31.2999	33.373	0.0559917	0.976658	-0.0679502	240.187	23.9414	51.0231	0.00210251	0.909801	-0.151353	255.236	33.5585	35.9743	0.0526719	0.966804	-0.0149284	Uncharacterized
YOL075C		292.629	29.7666	1.10844	223.626	16.8603	69.0035	3.75862e-05	0.847067	-0.202629	234.605	15.0134	58.0245	0.000150456	0.888654	-0.177669	187.042	37.8407	105.588	0.000278263	0.708491	-0.278024	Uncharacterized
YOL087C		327.428	30.6681	1.24026	261.816	29.5207	65.6118	0.00138339	0.991729	-0.182796	281.413	25.2265	46.015	0.00666205	1.06596	-0.127169	299.586	55.6194	27.842	0.29735	1.1348	0.0309664	Putative protein of unknown function; green fluorescent protein (GFP)-fusion protein localizes to the cytoplasm; deletion mutant is sensitive to various chemicals including phenanthroline, sanguinarine, and nordihydroguaiaretic acid
YOL089C	HAL9	240.114	26.3382	0.909524	187.634	15.56	52.4806	0.00019117	0.710734	-0.150585	212.367	29.4808	27.7474	0.0881374	0.80442	-0.0705418	184.52	24.7201	55.5944	0.00130608	0.698939	-0.110537	Putative transcription factor containing a zinc finger; overexpression increases salt tolerance through increased expression of the ENA1 (Na+/Li+ extrusion pump) gene while gene disruption decreases both salt tolerance and ENA1 expression
YOL090W	MSH2	243.605	15.6861	0.922745	170.601	34.3929	73.0035	0.00238816	0.646217	-0.227623	193.771	33.8478	49.8334	0.0134988	0.733983	-0.153699	185.014	36.522	58.5911	0.00938851	0.700809	-0.120434	Protein that forms heterodimers with Msh3p and Msh6p that bind to DNA mismatches to initiate the mismatch repair process; contains a Walker ATP-binding motif required for repair activity; Msh2p-Msh6p binds to and hydrolyzes ATP
YOL098C		267.646	33.4065	1.01381	218.064	13.5806	49.582	0.0011502	0.826	-0.134079	263.145	30.6479	4.50074	0.788332	0.996763	0.0214766	237.897	7.82148	29.7495	0.0215035	0.901123	-0.00116844	Uncharacterized
YOL105C	WSC3	262.247	29.2516	0.99336	206.268	23.6013	55.9792	0.00113935	0.781318	-0.159394	220.64	21.6221	41.6068	0.00617893	0.835759	-0.119854	202.715	37.7003	59.5318	0.00953314	0.767861	-0.11623	Partially redundant sensor-transducer of the stress-activated PKC1-MPK1 signaling pathway involved in maintenance of cell wall integrity; involved in the response to heat shock and other stressors; regulates 1,3-beta-glucan synthesis
YOL121C	RPS19A	249.015	29.6509	0.943239	200.196	20.7369	48.8195	0.00182819	0.758316	-0.134931	253.73	25.3017	-4.71545	0.741154	0.9611	0.0537046	221.795	22.7676	27.2204	0.0599468	0.840131	0.000648546	Protein component of the small (40S) ribosomal subunit, required for assembly and maturation of pre-40 S particles; mutations in human RPS19 are associated with Diamond Blackfan anemia; nearly identical to Rps19Bp
YOL155C		294.963	32.6974	1.11728	271.912	16.6799	23.051	0.0972117	1.02997	-0.0280983	231.326	34.1916	63.6362	0.00452908	0.876236	-0.198589	283.561	52.7271	11.4018	0.649832	1.07409	0.0797125	Haze-protective mannoprotein that reduces the particle size of aggregated proteins in white wines
YOR001W	RRP6	175.342	30.6098	0.664175	159.247	30.7352	16.0957	0.332346	0.603207	-0.0257672	160.918	27.3432	14.4246	0.348718	0.609537	-0.0294	243.666	17.3514	-68.3233	5.53017e-05	0.922976	0.33186	Nuclear exosome exonuclease component; has 3'-5' exonuclease activity; involved in RNA processing, maturation, surveillance, degradation, tethering, and export; has similarity to E. coli RNase D and to human PM-Sc1 100 (EXOSC10)
YOR026W	BUB3	118.503	21.2628	0.448875	107.754	21.0844	10.7492	0.346701	0.408158	-0.0169264	140.856	18.5176	-22.3528	0.0475104	0.533544	0.101727	162.371	14.1683	-43.8678	0.000228065	0.61504	0.215542	Kinetochore checkpoint WD40 repeat protein that localizes to kinetochores during prophase and metaphase, delays anaphase in the presence of unattached kinetochores; forms complexes with Mad1p-Bub1p and with Cdc20p, binds Mad2p and Mad3p
YOR032C	HMS1	247.527	23.3983	0.937602	163.497	25.4698	84.0297	6.40278e-05	0.619308	-0.268601	214.14	19.2263	33.387	0.00895906	0.811136	-0.0908371	207.88	22.0627	39.647	0.0057761	0.787424	-0.0470419	Basic helix-loop-helix (bHLH) protein with similarity to myc-family transcription factors; overexpression confers hyperfilamentous growth and suppresses the pseudohyphal filamentation defect of a diploid mep1 mep2 homozygous null mutant
YOR035C	SHE4	170.821	36.4395	0.64705	97.6063	9.22659	73.2148	9.09589e-05	0.369721	-0.243035	175.753	24.5063	-4.9319	0.75144	0.665731	0.0432693	162.532	11.6168	8.28903	0.518817	0.615652	0.0397776	Protein containing a UCS (UNC-45/CRO1/SHE4) domain, binds to myosin motor domains to regulate myosin function; involved in endocytosis, polarization of the actin cytoskeleton, and asymmetric mRNA localization
YOR043W	WHI2	249.652	14.8358	0.945652	173.007	28.8507	76.6448	0.00064162	0.655331	-0.240202	212.007	25.2737	37.6456	0.0124508	0.803055	-0.106662	195.196	40.8596	54.4562	0.0209193	0.739379	-0.102252	Protein required, with binding partner Psr1p, for full activation of the general stress response, possibly through Msn2p dephosphorylation; regulates growth during the diauxic shift; negative regulator of G1 cyclin expression
YOR066W		283.73	23.2422	1.07473	273.17	14.4453	10.5598	0.281405	1.03473	0.0169615	258.005	21.4606	25.7246	0.0451684	0.977292	-0.0566019	219.578	15.3103	64.1513	1.19497e-05	0.831736	-0.124777	Activator of G1-specific transcription factors, MBF and SBF; involved in regulation of the timing of G1-specific gene transcription and cell cycle initiation; localization is cell-cycle dependent and regulated by Cdc28p phosphorylation
YOR078W	BUD21	66.3286	17.3622	0.251245	44.1859	8.52551	22.1427	0.00437766	0.167371	-0.0705577	57.2665	5.63498	9.06211	0.159453	0.216918	-0.0247789	138.391	28.0958	-72.0627	0.000643298	0.524209	0.300602	Component of small ribosomal subunit (SSU) processosome that contains U3 snoRNA; originally isolated as bud-site selection mutant that displays a random budding pattern
YOR099W	KTR1	297.124	45.2946	1.12547	258.45	20.4881	38.6742	0.0359378	0.978977	-0.0868431	231.983	34.2844	65.1414	0.0062825	0.878722	-0.20398	257.233	31.9411	39.8911	0.0593452	0.974367	-0.0273009	Alpha-1,2-mannosyltransferase involved in O- and N-linked protein glycosylation; type II membrane protein; member of the KRE2/MNT1 mannosyltransferase family
YOR113W	AZF1	308.292	21.6052	1.16777	239.819	51.4682	68.4727	0.0207384	0.908407	-0.197474	232.827	41.0962	75.465	0.00457275	0.881921	-0.241477	262.168	35.16	46.124	0.0221059	0.993061	-0.0462572	Zinc-finger transcription factor, involved in induction of CLN3 transcription in response to glucose; genetic and physical interactions indicate a possible role in mitochondrial transcription or genome maintenance
YOR120W	GCY1	264.485	31.9865	1.00184	252.728	35.4225	11.7575	0.520652	0.957302	0.00856132	268.184	18.9414	-3.69934	0.775658	1.01585	0.0520825	194.479	31.0735	70.0061	0.00124452	0.736663	-0.154973	Putative NADP(+) coupled glycerol dehydrogenase, proposed to be involved in an alternative pathway for glycerol catabolism; member of the aldo-keto reductase (AKR) family
YOR133W	EFT1	270.294	20.8811	1.02384	196.498	20.57	73.7963	2.81216e-05	0.744309	-0.225268	183.34	31.6102	86.9537	0.000382166	0.694471	-0.290464	182.374	47.2075	87.9204	0.00464817	0.690809	-0.220409	Elongation factor 2 (EF-2), also encoded by EFT2; catalyzes ribosomal translocation during protein synthesis; contains diphthamide, the unique posttranslationally modified histidine residue specifically ADP-ribosylated by diphtheria toxin
YOR165W	SEY1	262.251	29.0894	0.993373	73.8361	8.42125	188.414	5.66461e-10	0.279682	-0.661042	274.495	38.3353	-12.2446	0.517939	1.03975	0.0841291	58.5196	31.658	203.731	3.5325e-06	0.221665	-0.662437	Protein of unknown function, contains two predicted GTP-binding motifs GXXXXGKS and DXXG near the N-terminus, homolog of the Arabidopsis gene RHD3 (Root Hair Defective)
YOR171C	LCB4	279.681	27.8814	1.0594	216.388	26.9882	63.2932	0.000932195	0.81965	-0.183599	261.201	19.8123	18.4792	0.145731	0.9894	-0.0297399	219.652	36.6676	60.0282	0.00786149	0.832017	-0.110846	Sphingoid long-chain base kinase, responsible for synthesis of long-chain base phosphates, which function as signaling molecules, regulates synthesis of ceramide from exogenous long-chain bases, localizes to the Golgi and late endosomes
YOR175C	ALE1	247.069	32.6655	0.935869	201.145	8.05635	45.9248	0.00147965	0.761911	-0.124357	253.367	22.7508	-6.29715	0.657511	0.959722	0.0594159	200.984	25.8435	46.0852	0.00831409	0.761304	-0.0716196	Broad-specificity lysophospholipid acyltransferase, part of MBOAT family of membrane-bound O-acyltransferases; key component of Lands cycle; may have role in fatty acid exchange at sn-2 position of mature glycerophospholipids
YOR178C	GAC1	245.271	28.2319	0.929055	198.923	11.5028	46.3472	0.000513378	0.753498	-0.126317	242.654	32.4343	2.61678	0.87328	0.919143	0.0253921	208.613	6.23685	36.6575	0.00253689	0.790201	-0.0366581	Regulatory subunit for Glc7p type-1 protein phosphatase (PP1), tethers Glc7p to Gsy2p glycogen synthase, binds Hsf1p heat shock transcription factor, required for induction of some HSF-regulated genes under heat shock
YOR180C	DCI1	306.892	47.2716	1.16247	278.361	33.1488	28.5315	0.179754	1.0544	-0.0464628	275.848	31.2067	31.0445	0.136681	1.04488	-0.0734189	225.013	30.1617	81.8796	0.00086098	0.852321	-0.182278	Peroxisomal delta(3,5)-delta(2,4)-dienoyl-CoA isomerase, involved in fatty acid metabolism, contains peroxisome targeting signals at amino and carboxy termini
YOR182C	RPS30B	159.208	32.5409	0.603062	150.846	15.0969	8.36286	0.497516	0.571385	0.000284779	160.177	13.0981	-0.968982	0.934699	0.606733	0.0265867	210.296	18.4374	-51.0873	0.00129881	0.796575	0.259849	Protein component of the small (40S) ribosomal subunit; nearly identical to Rps30Ap and has similarity to rat S30 ribosomal protein
YOR189W	IES4	260.389	17.6551	0.986321	222.511	17.2882	37.8774	0.00168413	0.842846	-0.0911999	233.756	19.166	26.6325	0.0211733	0.885441	-0.0634006	330.84	21.7032	-70.4516	8.47329e-05	1.25318	0.375357	Component of the INO80 chromatiin remodeling complex and target of the Mec1p/Tel1p DNA damage signaling pathway; proposed to link chromatin remodeling to replication checkpoint responses
YOR191W	RIS1	222.672	19.3848	0.843453	253.574	34.8756	-30.9026	0.0881597	0.960508	0.161758	266.153	20.6426	-43.4811	0.00200701	1.00815	0.196752	242.751	21.0693	-20.079	0.0909537	0.91951	0.168837	RING finger protein involved in proteolytic control of sumoylated substrates; interacts with SUMO (Smt3p); member of the SWI/SNF family of DNA-dependent ATPases; plays a role in antagonizing silencing during mating-type switching
YOR196C	LIP5	170.8	37.0975	0.646969	187.451	24.3529	-16.6515	0.297463	0.710043	0.0973631	192.726	15.3309	-21.9265	0.123148	0.730024	0.10764	232.621	33.6809	-61.8213	0.00535735	0.881141	0.305338	Protein involved in biosynthesis of the coenzyme lipoic acid, has similarity to E. coli lipoic acid synthase
YOR214C		315.642	31.6557	1.19561	280.7	25.5895	34.942	0.0318338	1.06326	-0.0689887	280.981	29.3599	34.6608	0.0477092	1.06432	-0.0858577	234.313	52.0827	81.3285	0.00994472	0.88755	-0.176545	Uncharacterized
YOR221C	MCT1	199.354	22.3487	0.755129	262.026	30.4081	-62.6723	0.00213933	0.992525	0.277417	233.281	18.7085	-33.9269	0.00666174	0.88364	0.157206	292.83	101.182	-93.476	0.0731368	1.10921	0.43714	Predicted malonyl-CoA:ACP transferase, putative component of a type-II mitochondrial fatty acid synthase that produces intermediates for phospholipid remodeling
YOR234C	RPL33B	259.802	26.1528	0.9841	300.478	8.21837	-40.6752	0.000710436	1.13817	0.20623	302.168	13.6026	-42.3652	0.000819885	1.14457	0.19787	296.341	51.9715	-36.5384	0.155559	1.1225	0.246654	Ribosomal protein L37 of the large (60S) ribosomal subunit, nearly identical to Rpl33Ap and has similarity to rat L35a; rpl33b null mutant exhibits normal growth while rpl33a rpl33b double null mutant is inviable
YOR270C	VPH1	132.545	29.133	0.502064	197.396	33.363	-64.8515	0.00303669	0.747713	0.272259	184.343	22.6726	-51.7986	0.00165266	0.698271	0.215285	202.238	32.7188	-69.6934	0.0016985	0.766054	0.319217	Subunit a of vacuolar-ATPase V0 domain, one of two isoforms (Vph1p and Stv1p); Vph1p is located in V-ATPase complexes of the vacuole while Stv1p is located in V-ATPase complexes of the Golgi and endosomes
YOR293W	RPS10A	44.8949	29.6213	0.170056	87.8576	60.289	-42.9627	0.155915	0.332794	0.17175	54.7523	8.98635	-9.85738	0.429459	0.207395	0.0438007	126.125	34.92	-81.2296	0.00119943	0.477744	0.326394	Protein component of the small (40S) ribosomal subunit; nearly identical to Rps10Bp and has similarity to rat ribosomal protein S10
YOR298C-A	MBF1	245.142	44.3197	0.928566	197.46	27.424	47.681	0.0187876	0.747956	-0.131396	204.546	20.2811	40.5954	0.0263873	0.774796	-0.118485	183.722	28.307	61.4195	0.00453257	0.695917	-0.130507	Transcriptional coactivator that bridges the DNA-binding region of Gcn4p and TATA-binding protein Spt15p; suppressor of frameshift mutations
YOR311C	HSD1	250.301	36.3549	0.948112	189.458	60.1399	60.8437	0.133333	0.717643	-0.180219	265.351	26.154	-15.0491	0.354533	1.00512	0.0930324	148.99	18.0381	101.311	3.63671e-06	0.564357	-0.279463	Diacylglycerol kinase, localized to the endoplasmic reticulum (ER); overproduction induces enlargement of ER-like membrane structures and suppresses a temperature-sensitive sly1 mutation; contains a CTP transferase domain
YOR312C	RPL20B	140.677	51.2655	0.532868	225.803	34.7586	-85.126	0.00307392	0.855315	0.350689	198.205	52.3551	-57.5282	0.0651528	0.750778	0.238159	212.071	60.9595	-71.3934	0.0434717	0.803298	0.329045	Protein component of the large (60S) ribosomal subunit, nearly identical to Rpl20Ap and has similarity to rat L18a ribosomal protein
YOR313C	SPS4	334.212	48.8516	1.26596	297.8	32.5117	36.4128	0.0958905	1.12803	-0.0708317	290.859	27.9914	43.3535	0.0405791	1.10174	-0.116112	230.313	56.2266	103.9	0.00412482	0.872397	-0.254304	Protein whose expression is induced during sporulation; not required for sporulation; heterologous expression in E. coli induces the SOS response that senses DNA damage
YOR327C	SNC2	236.624	20.4694	0.896304	299.34	37.6573	-62.7156	0.0074418	1.13386	0.285063	257.602	17.7448	-20.9775	0.0518803	0.975765	0.11352	285.337	119.971	-48.7131	0.36795	1.08082	0.283113	Vesicle membrane receptor protein (v-SNARE) involved in the fusion between Golgi-derived secretory vesicles with the plasma membrane; member of the synaptobrevin/VAMP family of R-type v-SNARE proteins
YPL047W	SGF11	286.63	44.9953	1.08572	253.109	50.6835	33.5204	0.212566	0.958748	-0.069428	259.404	31.38	27.2255	0.177694	0.982592	-0.0618695	189.941	43.9411	96.689	0.00146485	0.719473	-0.246817	Integral subunit of SAGA histone acetyltransferase complex, regulates transcription of a subset of SAGA-regulated genes, required for the Ubp8p association with SAGA and for H2B deubiquitylation
YPL051W	ARL3	339.239	41.4151	1.285	292.511	30.4987	46.7281	0.0223773	1.108	-0.108895	316.634	40.9644	22.6058	0.310515	1.19937	-0.0367983	257.44	50.2492	81.7995	0.00828624	0.975151	-0.168497	GTPase of the Ras superfamily required to recruit Arl1p to the Golgi; similar to ADP-ribosylation factor
YPL060W	LPE10	286.127	18.3904	1.08382	338.864	35.0156	-52.7366	0.0119429	1.28358	0.257202	340.942	24.9501	-54.8142	0.00144293	1.29145	0.248815	324.043	86.3965	-37.9152	0.335393	1.22743	0.262838	Mitochondrial inner membrane magnesium transporter, involved in maintenance of magnesium concentrations inside mitochondria; indirectly affects splicing of group II introns; functionally and structurally related to Mrs2p
YPL066W		304.398	50.371	1.15302	236.641	38.0234	67.757	0.00933538	0.896368	-0.195545	255.094	21.7178	49.3041	0.0178708	0.966265	-0.142943	242.512	20.6655	61.8864	0.00448159	0.918605	-0.107585	Uncharacterized
YPL067C		330.439	34.5957	1.25166	275.173	27.0101	55.2655	0.00358315	1.04232	-0.143001	302.121	16.2555	28.3177	0.0446158	1.1444	-0.0597007	261.765	52.9137	68.6738	0.0230728	0.991535	-0.122445	Uncharacterized
YPL105C		244.352	23.4665	0.925574	284.5	20.7994	-40.148	0.00404914	1.07765	0.201131	245.314	36.227	-0.962732	0.95511	0.929221	0.0388185	229.7	59.4122	14.6521	0.584673	0.870074	0.0463127	Protein of unknown function that may interact with ribosomes, based on co-purification experiments; authentic, non-tagged protein is detected in highly purified mitochondria in high-throughput studies
YPL133C	RDS2	243.49	34.9458	0.922309	213.968	28.6306	29.5217	0.0905087	0.810484	-0.0629422	218.496	7.73614	24.9935	0.0537163	0.827636	-0.0596247	182.812	15.0787	60.6774	0.00033657	0.69247	-0.128385	Zinc cluster transcriptional activator involved in conferring resistance to ketoconazole
YPL159C	PET20	340.878	44.9512	1.2912	289.223	44.1766	51.6547	0.0463123	1.09554	-0.127228	291.319	31.2656	49.5588	0.0216847	1.10348	-0.138657	256.057	30.8595	84.8209	0.000571722	0.969912	-0.179259	Mitochondrial protein, required for respiratory growth under some conditions and for stability of the mitochondrial genome
YPL166W		300.388	28.0511	1.13783	249.21	26.2439	51.1774	0.00349244	0.943978	-0.133549	258.311	22.8143	42.0768	0.00637626	0.97845	-0.116144	262.604	52.7132	37.7839	0.150244	0.994711	-0.0179592	Autophagy-specific protein that is required for recruitment of other ATG proteins to the pre-autophagosomal structure (PAS); interacts with Atg17p and localizas to the PAS in a manner interdependent with Atg17p and Cis1p; not conserved
YPL179W	PPQ1	246.75	32.6954	0.934658	218.946	12.8827	27.8034	0.0326439	0.829342	-0.055779	204.787	21.1169	41.9623	0.00766448	0.77571	-0.123431	190.718	18.6829	56.0322	0.000651994	0.722415	-0.109431	Putative protein serine/threonine phosphatase; null mutation enhances efficiency of translational suppressors
YPL180W	TCO89	107.692	34.115	0.407926	117.501	65.0124	-9.80887	0.74258	0.445081	0.0587749	74.0943	18.5643	33.5982	0.0232338	0.28066	-0.111765	194.526	44.5634	-86.8333	0.00296288	0.73684	0.373786	Subunit of TORC1 (Tor1p or Tor2p-Kog1p-Lst8p-Tco89p), a complex that regulates growth in response to nutrient availability; cooperates with Ssd1p in the maintenance of cellular integrity; deletion strains are hypersensitive to rapamycin
YPL191C		273.809	40.9718	1.03715	266.128	24.2902	7.68045	0.645084	1.00806	0.0258766	252.166	33.3152	21.6429	0.270839	0.955174	-0.0425689	197.048	46.3175	76.761	0.00778458	0.746393	-0.176674	Uncharacterized
YPL207W		265.384	33.1452	1.00524	270.597	35.3663	-5.21324	0.776051	1.02499	0.0730249	259.916	25.8835	5.46744	0.719363	0.984531	0.0174891	194.13	31.5944	71.2533	0.00125835	0.735342	-0.159322	Protein required for the synthesis of wybutosine, a modified guanosine found at the 3'-position adjacent to the anticodon of phenylalanine tRNA which supports reading frame maintenance by stabilizing codon-anticodon interactions
YPL226W	NEW1	264.93	35.8969	1.00352	283.98	17.6143	-19.0503	0.178623	1.07568	0.125347	259.219	32.4436	5.71148	0.749197	0.981889	0.0164995	196.331	23.8378	68.5992	0.000442738	0.743678	-0.149458	ATP binding cassette family member; Asn/Gln-rich rich region supports [NU+] prion formation and susceptibility to [PSI+] prion induction; homologous to mRNA export factor from S. pombe and similar protein from C. albicans
YPL263C	KEL3	302.003	43.9078	1.14395	282.968	27.1261	19.0354	0.302019	1.07185	-0.0114742	274.828	17.739	27.1747	0.106588	1.04102	-0.0594642	236.963	22.7243	65.04	0.00164715	0.897587	-0.120529	Cytoplasmic protein of unknown function
YPR002W	PDH1	296.756	40.6282	1.12408	273.087	29.3681	23.6685	0.213625	1.03442	-0.0300773	262.958	29.6722	33.7977	0.0859889	0.996054	-0.0853068	221.653	12.9764	75.103	0.000390089	0.839594	-0.160833	Mitochondrial protein that participates in respiration, induced by diauxic shift; homologous to E. coli PrpD, may take part in the conversion of 2-methylcitrate to 2-methylisocitrate
YPR007C	REC8	276.807	31.3236	1.04851	228.161	20.8262	48.6455	0.00232606	0.864247	-0.128692	249.403	21.3855	27.4033	0.0574009	0.94471	-0.0639569	224.043	22.4713	52.7635	0.00171176	0.848649	-0.0845254	Meiosis-specific component of sister chromatid cohesion complex; maintains cohesion between sister chromatids during meiosis I; maintains cohesion between centromeres of sister chromatids until meiosis II; homolog of S. pombe Rec8p
YPR008W	HAA1	283.43	31.4281	1.0736	270.744	24.2134	12.6857	0.382062	1.02554	0.00884869	261.473	28.1552	21.9561	0.174823	0.990429	-0.0423705	212.885	14.2551	70.5442	3.1856e-05	0.806384	-0.149117	Transcriptional activator involved in the transcription of TPO2, YRO2, and other genes putatively encoding membrane stress proteins; involved in adaptation to weak acid stress
YPR018W	RLF2	222.331	32.847	0.842165	211.758	30.8915	10.5736	0.530545	0.802113	0.00458317	216.687	33.9144	5.64403	0.750839	0.820786	0.0106234	289.934	41.969	-67.6021	0.0086165	1.09823	0.348707	Largest subunit (p90) of the Chromatin Assembly Complex (CAF-1) with Cac2p and Msi1p that assembles newly synthesized histones onto recently replicated DNA; involved in the maintenance of transcriptionally silent chromatin
YPR020W	ATP20	246.386	27.794	0.933279	207.343	22.48	39.0427	0.0108733	0.78539	-0.0984252	185.815	21.1553	60.5706	0.000385729	0.703845	-0.193969	207.829	35.7603	38.5565	0.0529216	0.787232	-0.0433865	Subunit g of the mitochondrial F1F0 ATP synthase; reversibly phosphorylated on two residues; unphosphorylated form is required for dimerization of the ATP synthase complex
YPR023C	EAF3	242.801	37.7084	0.919702	229.375	13.4996	13.4262	0.326516	0.868845	-0.00211249	199.86	15.7643	42.9409	0.00738465	0.757047	-0.127706	150.495	27.9395	92.3062	8.31564e-05	0.570057	-0.248477	Esa1p-associated factor, nonessential component of the NuA4 acetyltransferase complex, homologous to Drosophila dosage compensation protein MSL3; plays a role in regulating Ty1 transposition
YPR024W	YME1	213.186	29.681	0.807524	89.6317	73.7869	123.555	0.0175154	0.339514	-0.425211	63.1767	37.7394	150.01	1.95454e-05	0.239306	-0.537533	92.298	36.9697	120.888	8.42499e-05	0.349614	-0.369083	Catalytic subunit of the mitochondrial inner membrane i-AAA protease complex, which is responsible for degradation of unfolded or misfolded mitochondrial gene products; mutation causes an elevated rate of mitochondrial turnover
YPR032W	SRO7	184.021	23.1214	0.69705	187.11	25.8648	-3.08867	0.814959	0.708749	0.0486432	143.044	18.5222	40.9773	0.00194663	0.541833	-0.128729	217.213	23.6386	-33.1916	0.0199853	0.822775	0.202401	Effector of Rab GTPase Sec4p, forms a complex with Sec4p and t-SNARE Sec9p; involved in exocytosis and docking and fusion of post-Golgi vesicles with plasma membrane; homolog of Sro77p and Drosophila lgl tumor suppressor
YPR043W	RPL43A	159.115	31.8137	0.602708	157.788	33.9432	1.32726	0.939733	0.59768	0.026916	163.877	20.3456	-4.76229	0.720596	0.620747	0.0409419	230.164	28.2648	-71.0488	0.000604672	0.871832	0.335422	Protein component of the large (60S) ribosomal subunit, identical to Rpl43Bp and has similarity to rat L37a ribosomal protein; null mutation confers a dominant lethal phenotype
YPR045C		175.463	28.0621	0.664634	190.611	48.0382	-15.1474	0.50407	0.722011	0.0926021	190.714	9.81156	-15.25	0.142966	0.7224	0.0830214	249.313	36.3294	-73.8494	0.00229403	0.944367	0.352842	Uncharacterized
YPR066W	UBA3	178.246	31.2163	0.675176	195.011	15.5709	-16.7641	0.175659	0.738676	0.0992845	180.257	8.74561	-2.01016	0.851578	0.68279	0.0332709	248.967	25.5852	-70.7202	0.00031966	0.943056	0.342149	Protein that acts together with Ula1p to activate Rub1p before its conjugation to proteins (neddylation), which may play a role in protein degradation; GFP-fusion protein localizes to the cytoplasm in a punctate pattern
YPR097W		336.25	46.8381	1.27367	304.049	38.0253	32.2004	0.15826	1.1517	-0.0544667	287.15	34.2173	49.1	0.0310686	1.08769	-0.137585	243.68	34.5047	92.57	0.000545521	0.92303	-0.21054	Protein that contains a Phox homology (PX) domain and binds phosphoinositides; the authentic, non-tagged protein is detected in highly purified mitochondria in high-throughput studies
YPR098C		309.274	43.111	1.17149	281.162	54.2679	28.1121	0.308556	1.06501	-0.0443962	277.32	33.877	31.9541	0.124294	1.05045	-0.0765216	229.888	22.5233	79.3857	0.000274762	0.870789	-0.171839	Uncharacterized
YPR140W	TAZ1	290.301	49.4191	1.09962	256.728	47.256	33.5724	0.20329	0.972456	-0.0688881	236.803	22.8247	53.498	0.011122	0.89698	-0.160858	226.212	18.9308	64.0885	0.00294087	0.856864	-0.121801	Lyso-phosphatidylcholine acyltransferase, required for normal phospholipid content of mitochondrial membranes; may remodel acyl groups of cardiolipin in the inner membrane; human ortholog tafazzin is implicated in Barth syndrome
YPR154W	PIN3	288.726	41.5127	1.09366	268.015	30.9641	20.7106	0.276109	1.01521	-0.0204852	263.233	30.2159	25.4934	0.180031	0.997093	-0.0550068	212.399	25.4602	76.3273	0.000450287	0.804541	-0.168816	Protein that induces appearance of [PIN+] prion when overproduced
YPR155C	NCA2	248.517	40.343	0.941353	226.093	27.4667	22.424	0.2085	0.856413	-0.0350478	201.561	4.24355	46.9556	0.00502608	0.76349	-0.142091	199.71	42.8609	48.8071	0.0475232	0.756478	-0.0813264	Protein involved in regulation of mitochondrial expression of subunits 6 (Atp6p) and 8 (Atp8p) of the Fo-F1 ATP synthase; functions with Nca3p
YPR173C	VPS4	121.736	41.512	0.461121	188.776	36.8298	-67.0398	0.00585316	0.71506	0.278378	189.348	15.6741	-67.6117	0.000520466	0.717226	0.273627	264.052	52.8848	-142.316	0.000360168	1.0002	0.5898	AAA-ATPase involved in multivesicular body (MVB) protein sorting, ATP-bound Vps4p localizes to endosomes and catalyzes ESCRT-III disassembly and membrane release; ATPase activity is activated by Vta1p; regulates cellular sterol metabolism
YPR174C		256.908	38.2433	0.973137	219.58	41.75	37.3283	0.104665	0.831742	-0.0898187	213.877	17.0611	43.0311	0.00850733	0.81014	-0.126017	211.004	32.3784	45.9043	0.0247022	0.799257	-0.0668349	Uncharacterized
YPR179C	HDA3	157.876	19.37	0.598016	149.405	23.9863	8.47081	0.482154	0.56593	-0.000391559	185.259	17.8789	-27.3828	0.0146702	0.701739	0.126447	219.765	35.3951	-61.8886	0.00585113	0.832443	0.300208	Subunit of a possibly tetrameric trichostatin A-sensitive class II histone deacetylase complex that contains an Hda1p homodimer and an Hda2p-Hda3p heterodimer; required for the activity of the complex; has similarity to Hda2p
YPR193C	HPA2	263.356	31.2907	0.997562	261.664	29.674	1.69266	0.91575	0.99115	0.0464592	269.078	38.3048	-5.72123	0.764232	1.01923	0.0595787	200.733	12.6803	62.623	8.84943e-05	0.760354	-0.127476	Tetrameric histone acetyltransferase with similarity to Gcn5p, Hat1p, Elp3p, and Hpa3p; acetylates histones H3 and H4 in vitro and exhibits autoacetylation activity
